1 **Arabidopsis Poly(ADP-ribose)-binding protein RCD1 interacts with Photoregulatory Protein**  
2 **Kinases in nuclear bodies.**

3 Julia P. Vainonen<sup>1,2\*</sup>, Alexey Shapiguzov<sup>1,3\*</sup>, Julia Krasensky-Wrzaczek<sup>1\*</sup>, Raffaella De Masi<sup>4,5</sup>,  
4 Richard Gossens<sup>1</sup>, Iulia Danciu<sup>6,7</sup>, Natalia Battchikova<sup>8</sup>, Claudia Jonak<sup>6,7</sup>, Lennart Wirthmueller<sup>4,5</sup>,  
5 Michael Wrzaczek<sup>1</sup>, Jaakko Kangasjärvi<sup>1</sup>

6 Author affiliations

7 1. Organismal and Evolutionary Biology Research Programme, Faculty of Biological and  
8 Environmental Sciences, and Viikki Plant Science Center, University of Helsinki, FI-00014 Helsinki,  
9 Finland.

10 2. Current address: Turku Bioscience Centre, University of Turku, FI-20520 Turku, Finland

11 3. Permanent address: Institute of Plant Physiology, Russian Academy of Sciences, Botanicheskaya  
12 Street, 35, 127276 Moscow, Russia.

13 4. Department Biochemistry of Plant Interactions, Leibniz Institute of Plant Biochemistry, Weinberg 3,  
14 06120 Halle (Saale), Germany

15 5. Dahlem Centre of Plant Sciences, Institute of Biology, Freie Universität Berlin, Königin-Luise-Str.  
16 12-16, 14195 Berlin, Germany

17 6. Gregor Mendel Institute, Austrian Academy of Sciences, Vienna BioCenter, Dr. Bohr-Gasse 3, 1030  
18 Vienna, Austria

19 7. Bioresources Unit, Center for Health & Bioresources, AIT Austrian Institute of Technology GmbH,  
20 3430, Tulln, Austria.

21 8. Department of Biochemistry, Molecular Plant Biology, University of Turku, FI-20014 Turku,  
22 Finland.

23

24 \* These authors contributed equally to the manuscript.

25 Corresponding author: Jaakko Kangasjärvi, [jaakko.kangasjarvi@helsinki.fi](mailto:jaakko.kangasjarvi@helsinki.fi)

26

27 **Abstract**

28

29

30 Continuous reprogramming of gene expression in response to environmental signals in plants is achieved  
31 through signaling hub proteins that integrate external stimuli and transcriptional responses. RADICAL-  
32 INDUCED CELL DEATH1 (RCD1) functions as a nuclear hub protein, which interacts with a variety  
33 of transcription factors with its C-terminal RST domain and thereby acts as a co-regulator of numerous  
34 plant stress reactions. Here a previously function for RCD1 as a novel plant PAR reader protein is  
35 shown; RCD1 functions as a scaffold protein, which recruits transcription factors to specific locations  
36 inside the nucleus in PAR-dependent manner. The N-terminal WWE- and PARP-like domains of  
37 RCD1 bind poly(ADP-ribose) (PAR) and determine its localization to nuclear bodies (NBs), which is  
38 prevented by chemical inhibition of PAR synthesis. RCD1 also binds and recruits Photoregulatory  
39 Protein Kinases (PPKs) to NBs. The PPKs, which have been associated with circadian clock, abscisic  
40 acid, and light signaling pathways, phosphorylate RCD1 at multiple sites in the intrinsically disordered  
41 region between the WWE- and PARP-like-domains, which affects the stability and function of RCD1  
42 in the nucleus. Phosphorylation of RCD1 by PPKs provides a mechanism where turnover of a PAR-  
43 binding transcriptional co-regulator is controlled by nuclear phosphorylation signaling pathways.

44 **INTRODUCTION**

45 Plants are constantly exposed to a variety of environmental cues that are relayed to the nucleus leading  
46 to changes in gene expression. The eukaryotic nucleus has many functions including DNA and RNA  
47 biogenesis and processing, transcriptional regulation, RNA splicing, protein modification and  
48 degradation. These functions are organized within non-membranous compartments, so-called “nuclear  
49 bodies” (NBs; Mao *et al*, 2011). Several NBs have been identified, including the nucleolus, Cajal  
50 bodies, Polycomb bodies, and photobodies. NB-associated proteins have been described, including  
51 members of the splicing machinery (Reddy *et al*, 2012), chromatin-associated proteins (Simon *et al*,  
52 2015), ubiquitin ligases (Christians *et al*, 2012), photoreceptors (Van Buskirk *et al*, 2012), and protein  
53 kinases (Wang *et al*, 2015).

54 *Arabidopsis thaliana* RADICAL-INDUCED CELL DEATH1 (RCD1) is a nuclear-localized  
55 multidomain protein comprised of an N-terminal bipartite nuclear localization sequence (NLS), a  
56 WWE-domain, a poly(ADP-ribose) polymerase-like (PARP-like)-domain, and an RCD1-SRO-TAF4  
57 (RST)-domain (Ahlfors *et al*, 2004; Jaspers *et al*, 2009; Jaspers *et al*, 2010; **Figure 1A**). The inter-  
58 domain regions of RCD1 are intrinsically disordered regions (IDRs), which likely provides flexibility  
59 in assuming the final overall protein conformation. RCD1 and its paralog, SRO1 (SIMILAR TO RCD  
60 ONE 1), can form homo- and heterodimers (Wirthmueller *et al*, 2018) and can be considered essential  
61 proteins since the *rcd1 sro1* double mutant is not viable under standard growth conditions (Jaspers *et al*  
62 *et al*, 2009; Teotia & Lamb, 2011). In plants, the RST-domain is unique to the RCD1-SRO protein family  
63 and TAF4 proteins (Jaspers *et al*, 2010). It has been described as a domain that mediates interactions  
64 with many RCD1-associated proteins (O’Shea *et al*, 2017; Bugge *et al*, 2018; Shapiguzov *et al*, 2019).  
65 A structurally diverse set of transcription factors interacts with the RST-domain, making RCD1 an  
66 important hub of transcriptional regulation (Jaspers *et al*, 2009; Vainonen *et al*, 2012; O’Shea *et al*,  
67 2017; Christensen *et al*, 2019; Shapiguzov *et al*, 2019; Jespersen & Barbar, 2020). Unlike the RST-  
68 domain, the WWE- and PARP-like-domains of RCD1 have hardly been characterized. The WWE-  
69 domain was originally proposed to be a protein-protein interaction domain related to ubiquitination and  
70 ADP-ribosylation (Aravind 2001). Later studies have shown that animal WWE-domains bind iso-ADP  
71 ribose (a structural unit of poly(ADP-ribose) - PAR; Wang *et al*, 2012; DaRosa *et al*, 2015). In  
72 *Arabidopsis thaliana*, the WWE-domain has only been found in RCD1 and its paralog SRO1. While  
73 the PARP-like-domain in these proteins does not have PARP activity (Jaspers *et al*, 2010;

74 Wirthmueller *et al*, 2018), the presence of a WWE- and a PARP-like-domains together suggests a  
75 function of RCD1 in PAR-related processes (Vainonen *et al*, 2016).

76 Poly-ADP-ribosylation (PARylation) of proteins is a reversible posttranslational modification, which  
77 has so far been mostly studied in animals (Gupte *et al*, 2017; Cohen & Chang, 2018). PARPs catalyze  
78 PARylation by covalently attaching ADP-ribose moieties to glutamate, aspartate, lysine, arginine,  
79 serine, threonine and cysteine residues in a species- and tissue-specific manner (Jungmichel *et al*, 2013;  
80 Zhang *et al*, 2013; Martello *et al*, 2016; Leung 2017; Palazzo *et al*, 2018). PAR-glycohydrolase  
81 (PARG) can trim down PAR chains to the terminal protein-bound ADP-ribose thereby removing PAR  
82 from proteins. Additionally, several signaling components that recognize PARylated proteins, so-called  
83 “PAR readers”, have been identified in animal systems (Gupte *et al*, 2017; Kim *et al*, 2020) but have  
84 not been described in plants yet. On a functional level, PARylation has been shown to regulate a  
85 variety of cellular processes including chromatin remodeling, transcription, and programmed cell death  
86 (Gupte *et al*, 2017; Kim *et al*, 2020). In plants, the role of PAR is only starting to emerge: the few  
87 studies available suggest an important role for PARylation in plant stress and developmental responses  
88 (Vainonen *et al*, 2016).

89 In addition to transcription factors, RCD1 has been shown to interact with Photoregulatory Protein  
90 Kinases (PPKs; also named MUT9-like kinases, MLKs, or Arabidopsis EL1-like kinases, AELs;  
91 Wirthmueller *et al*, 2018; Shapiguzov *et al*, 2019). In Arabidopsis, this recently discovered protein  
92 kinase family is comprised of 4 members that have been shown to localize to NBs (Wang *et al*, 2015).  
93 PPKs interact with different nuclear proteins, including histones, components of the circadian clock  
94 and light signaling, and the ABA receptor PYR/PYL/RCAR (Wang *et al*, 2015; Huang *et al*, 2016; Liu  
95 *et al*, 2017; Ni *et al*, 2017; Su *et al*, 2017; Chen *et al*, 2018; Zheng *et al*, 2018). While the mechanistic  
96 role of histone and circadian clock component phosphorylation by PPKs has not been described,  
97 phosphorylation of the transcription regulators PIF3 and CRY2, and the ABA receptor  
98 PYR/PYL/RCAR has been shown to target these proteins for degradation (Liu *et al*, 2017; Ni *et al*,  
99 2017; Chen *et al*, 2018).

100 Here we show that Arabidopsis RCD1 localizes to NBs in a PAR-dependent manner. RCD1 directly  
101 binds PAR via the WWE- and PARP-like-domains and can therefore be described as the first identified  
102 PAR reader in plants. Furthermore, we demonstrate that RCD1 is phosphorylated by PPK protein  
103 kinase family members, which co-localize with RCD1 *in vivo* in NBs. Increased RCD1 protein levels

104 together with altered tolerance to oxidative stress in *ppk* mutant plants suggest that phosphorylation by  
105 PPKs regulates RCD1 protein stability.

106

## 107 **RESULTS**

### 108 **Nuclear localization is essential for RCD1 function**

109 To address the role of RCD1 localization for its function, the basic amino acids of the NLS were  
110 substituted with aliphatic ones (K21L/R22I and R56I/R57I). These point mutations were introduced  
111 into a construct expressing RCD1 tagged with triple HA epitope at the protein C-terminus, under the  
112 native RCD1 promoter (Jaspers *et al*, 2009) and expressed in *rcd1* background (RCD1*nls*-HA lines  
113 hereafter). Among other stress- and development-related phenotypes (Overmyer *et al*, 2000; Ahlfors *et al*,  
114 2004; Jaspers *et al*, 2009; Teotia & Lamb, 2009; Hiltcher *et al*, 2014), the *rcd1* mutant displays  
115 curly leaves and tolerance to the herbicide methyl viologen (MV) (Ahlfors *et al*, 2004; Fujibe *et al*,  
116 2004; Shapiguzov *et al*, 2019). At the molecular level, MV interferes with the electron transfer chain in  
117 chloroplasts and catalyzes production of reactive oxygen species (ROS). Introduction of RCD1*nls*-HA  
118 into *rcd1* did not complement the curly leaf phenotype whereas RCD1-HA restored the leaf phenotype  
119 (**Figure 1B**). Similarly, the increased tolerance of *rcd1* to MV was not reverted to wild type-like  
120 sensitivity in RCD1*nls*-HA plants (**Figure 1C**). Analysis of RCD1 protein levels in the transgenic lines  
121 revealed increased RCD1 accumulation in RCD1*nls*-HA lines compared to wild type RCD1-HA  
122 (**Figure 1D**). Thus, despite higher levels of RCD1 in RCD1*nls*-HA lines, *rcd1* phenotypes were not  
123 complemented. These results suggest that nuclear localization is required for the proper function of  
124 RCD1.

### 125 **RCD1 localizes to NBs and binds PAR**

126 To study the subcellular localization of RCD1 in further detail, we generated stable Arabidopsis lines  
127 expressing wild type RCD1-Venus fusion protein, as well as deletion constructs lacking the individual  
128 domains (WWE, PARP-like, and RST) under control of the *UBIQUITIN10* promoter in *rcd1*  
129 background. A schematic representation of RCD1-Venus constructs is shown in **Supplementary**  
130 **figure 1A**. Wild type RCD1-Venus and the domain deletion mutants complemented the *rcd1* mutant  
131 habitus (**Supplementary figure 1B**), confirming that the introduced transgenes retained functionality.  
132 The MV sensitivity phenotype was restored by RCD1-Venus, the RCD1 $\Delta$ WWE-Venus and

133 RCD1 $\Delta$ PARP-Venus constructs but only partially by RCD1 $\Delta$ RST-Venus (**Supplementary figure 1C**),  
134 suggesting that the RST-domain is essential for at least some of the several functions of RCD1.

135 Microscopic analysis of wild type RCD1-Venus lines showed that RCD1 localized exclusively to the  
136 nucleus. Within the nucleus, RCD1-Venus localized to the nucleoplasm and, interestingly, in distinct  
137 NBs (**Figure 2A**). Deletion of the WWE- or the PARP-like-domain eliminated the localization of  
138 RCD1 to these NBs under standard growth conditions, whereas its nuclear distribution was not  
139 influenced by the deletion of the RST-domain (**Figure 2A**). Immunoblot analysis of the corresponding  
140 lines showed increased levels of RCD1 in all deletion construct lines compared to wild type RCD1-  
141 Venus (**Supplementary figure 1D**). Thus, disappearance of RCD1 from NBs was not due to low  
142 protein abundance.

143 The WWE-domain has previously been described to bind PAR in mammalian cells (Zhang *et al*, 2011;  
144 Wang *et al*, 2012; DaRosa *et al*, 2015). Therefore, we tested whether 3-methoxybenzamide (3MB), a  
145 chemical inhibitor of PAR synthesis, would influence NB localization of RCD1-Venus. Indeed, in  
146 3MB-treated plants, RCD1-Venus appeared almost exclusively in the nucleoplasm (**Figure 2B**). This  
147 suggests that the presence of PARylated proteins in the nucleus would be necessary for RCD1 to  
148 localize to NBs.

149 To examine whether RCD1 can bind PAR directly, we tested the interaction *in vitro*. Recombinant  
150 proteins were expressed in *E. coli*, purified (**Supplementary Figure 2A**) and dot-blotted on a  
151 nitrocellulose membrane. The membrane was then incubated with PAR polymer, washed, and  
152 subsequently probed with anti-PAR or anti-GST antibodies. As shown in **Figure 2C**, the WWE-  
153 domain of RCD1 alone, as well as the full-length protein (fused to either GST or His-tags,  
154 respectively), interacted with PAR. Interestingly, the affinity to PAR was stronger for full-length RCD1  
155 compared to the WWE-domain alone (**Figure 2C**). This suggests that the PARP-like-domain of RCD1  
156 was also involved in PAR binding *in vitro*. To verify that PAR-binding was mediated by the WWE-  
157 domain, we tested the PAR-binding properties of a truncated version of RCD1 lacking the WWE-  
158 domain (GST-RCD1 $\Delta$ WWE), which was not able to bind PAR as shown in **Figure 2C**.

159 For quantitative characterization of the RCD1-PAR interaction we applied surface plasmon resonance  
160 (SPR), a method which allows label-free detection of biomolecular interactions. SPR demonstrated that  
161 full-length RCD1 interacted with PAR and that the interaction was abolished by deletion of the WWE-  
162 domain (GST-RCD1 $\Delta$ WWE; **Figure 2D**). The binding curve was congruent with the WWE-domains

163 described in other studies (Zhang *et al*, 2011; Wang *et al*, 2012). Absence of dissociation in the running  
164 buffer (**Figure 2D**) confirmed strong complex formation between PAR and RCD1. Estimation of the  
165 affinity of the interaction by binding experiments with increasing concentrations of the PAR ligand  
166 resulted in a dissociation constant of 28.2 nM (**Supplementary Figure 2D**). However, SPR analyses  
167 did not identify interaction between RCD1 and compounds related to PAR, monomeric ADP-ribose or  
168 cyclic ADP-ribose, a known second messenger (**Supplementary Figure 2B and C**). Thus, our  
169 experiments showed that RCD1 binds PAR with specificity, high affinity and this interaction requires  
170 the WWE- and PARP-like- domains.

### 171 **RCD1 colocalizes with PPKs in NBs**

172 Immunoblot analyses showed that nuclear-localized RCD1-HA migrated in SDS-PAGE as a double  
173 band (**Figure 1D**), indicative of post-translational modification of the protein. To test whether the  
174 double band was caused by phosphorylation of RCD1, protein extracts from plants expressing wild  
175 type RCD1-HA were treated with calf intestinal alkaline phosphatase (CIP). The phosphatase treatment  
176 eliminated the double band of RCD1-HA (**Supplementary Figure 3**), suggesting that RCD1 is an *in*  
177 *vivo* phosphoprotein. RCD1-HA migrated as a single band in the transgenic lines expressing RCD1*nls*-  
178 HA (**Figure 1D**), indicating that nuclear localization was necessary for phosphorylation of RCD1.

179 Our previous proteomic analyses of RCD1-interactors (Wirthmueller *et al*, 2018; Shapiguzov *et al*,  
180 2019), showed that RCD1 interacted *in vivo* with a newly described family of protein kinases, the  
181 Photoregulatory Protein Kinases (PPKs). This interaction was confirmed by targeted co-  
182 immunoprecipitation experiments in tobacco using RCD1-GFP and PPK-HA constructs, in which  
183 RCD1-GFP co-immunoprecipitated with PPK1, 3 and 4 (**Supplementary Figure 4**). The apparent lack  
184 of interaction between RCD1 and PPK2 in this assay could indicate either isoform-specific differences  
185 in the strength of association, or represented a technical limitation as PPK2 protein was hardly  
186 detectable in total protein extracts. Collectively, these data confirmed complex formation between  
187 RCD1 and PPKs also in a heterologous expression system.

188 It has previously been shown that PPKs localize to NBs in Arabidopsis (Wang *et al*, 2015). To test  
189 whether PPKs co-localized with RCD1, we co-expressed RCD1-Venus and PPK-RFP transiently in  
190 tobacco. Results shown in **Figure 3A** demonstrated co-localization of RCD1 with all four RFP-tagged  
191 PPKs in NBs, but not with RFP alone (**Figure 3A**). Expression of PPK-RFP constructs alone in  
192 tobacco showed uniform distribution of the proteins inside the nucleus (**Figure 3B**), which suggests



193 that localization of PPKs to NBs was dependent on the interaction with RCD1-Venus. Thus, these  
194 results were in line with complex formation between RCD1 and PPKs and confirmed their co-  
195 localization in NBs.

### 196 **RCD1 is phosphorylated by PPKs**

197 Interaction of RCD1 with PPKs prompted us to study the phosphorylation of RCD1 in more detail.  
198 Mass spectrometric determination of *in vivo* phosphosites in RCD1-HA immunoprecipitated from  
199 Arabidopsis revealed several phospho-serine and phospho-threonine-containing peptides (**Table 1**). To  
200 verify whether PPKs could phosphorylate RCD1 directly, we tested PPK kinase activity towards RCD1  
201 *in vitro* using recombinant GST-tagged proteins. GST-PPK2 and GST-PPK4 could be purified from *E.*  
202 *coli* with detectable kinase activity against the generic substrates MBP and casein (**Supplementary**  
203 **figure 5**). Phosphorylation experiments using radioactively labelled  $\gamma$ [<sup>32</sup>P]-ATP (**Figure 4B**) showed  
204 that both GST-PPKs were able to directly phosphorylate GST-RCD1 *in vitro*. Phosphorylated GST-  
205 RCD1 was analyzed by mass spectrometry to identify PPK-dependent *in vitro* phosphorylation sites.  
206 This revealed that several of the PPK-dependent *in vitro* phosphopeptides of RCD1 were also identified  
207 in the *in vivo* pull-down experiments. All *in vivo* and *in vitro* phosphopeptides from this and an earlier  
208 study (Wirthmueller *et al*, 2018) are listed in **Table 1**. A schematic representation of all identified  
209 phospho-sites in RCD1 is shown in **Figure 4A**. Interestingly, RCD1 is phosphorylated almost  
210 exclusively in its IDRs.

211 Combined data of *in vivo* and *in vitro* analyses of RCD1 phosphorylation revealed that most  
212 phosphosites concentrated in IDR2, the region between the WWE- and PARP-like-domains. We  
213 mutated the 15 identified phosphosites in this region to non-phosphorylatable alanine residues by gene  
214 synthesis (GST-RCD1<sup>S/T</sup>IDR2<sup>A</sup>). This protein variant was subjected to *in vitro* kinase assays with  
215 GST-PPK2 and GST-PPK4. Mutation of the 15 phosphosites in IDR2 abolished phosphorylation of  
216 RCD1 by PPKs (**Figure 4B, C**). Thus, PPKs showed specificity towards RCD1 phosphosites in IDR2.  
217 This is consistent with the previous result that the sequence up to the PARP-like-domain was sufficient  
218 to co-immunoprecipitate endogenous PPKs from plant cell extracts (Wirthmueller *et al*, 2018). To  
219 address the role of IDR2 phosphorylation *in vivo*, we generated transgenic lines expressing  
220 RCD1<sup>S/T</sup>IDR2<sup>A</sup>-HA construct in *rcd1* background under the native RCD1 promoter. Analysis of  
221 protein abundance with a HA-specific antibody revealed that in half of the *rcd1*: RCD1<sup>S/T</sup>IDR2<sup>A</sup>-HA  
222 lines (e.g. line C), RCD1 level was notably higher than in the lines expressing highest levels of wild



223 type RCD1 (**Figure 4D**). In accordance with the *in-vitro* data, mutation of the IDR2 phospho-sites to  
224 alanine resulted in disappearance of the phosphorylated protein form in *rcd1*: RCD1<sup>S/T</sup>IDR2<sup>A</sup>-HA line  
225 (**Supplementary figure 6**). Despite the higher abundance, the RCD1<sup>S/T</sup>IDR2<sup>A</sup>-HA variant did not fully  
226 complement *rcd1*-specific (Shapiguzov *et al*, 2019) accumulation of alternative oxidases (AOX1/2), as  
227 revealed by immunoblot with  $\alpha$ AOX1/2 antibodies (**Figure 4D**). Neither did expression of  
228 RCD1<sup>S/T</sup>IDR2<sup>A</sup>-HA expression fully complement the *rcd1* MV tolerance (**Figure 4E**), which suggests  
229 that mutation of the 15 residues in IDR2 affect the nuclear function of RCD1.

230 In addition to the PPK-related phospho-sites between the WWE- and the PARP-like-domains, RCD1  
231 contains other *in vivo* phosphorylation sites, presumably targeted by other protein kinases linking  
232 RCD1 to different upstream signaling pathways (**Figure 4A**). One of the identified sites, Thr204, is a  
233 predicted target for proline-directed protein kinases. We tested Arabidopsis GSK3/Shaggy-like protein  
234 kinases (ASKs), a group of stress-related proline-directed protein kinases (Saidi *et al*, 2012), for their  
235 ability to phosphorylate RCD1. *In vitro* kinase assays with several ASKs (**Supplementary figure 7A**)  
236 showed that ASK $\alpha$ , ASK $\gamma$ , and to a lesser extent, ASK $\epsilon$  phosphorylated RCD1. Since Thr204 was the  
237 only phosphorylated residue flanked by a proline, we mutated Thr204 to alanine (RCD1-T204A). This  
238 mutation abolished or strongly reduced phosphorylation of RCD1 by the ASKs (**Supplementary**  
239 **figure 7B**) indicating that ASK $\alpha$ , ASK $\gamma$ , and ASK $\epsilon$  target Thr204. The kinases targeting phospho-sites  
240 towards the N- and C-termini remain to be identified.

241 Our results with *rcd1*: RCD1<sup>S/T</sup>IDR2<sup>A</sup>-HA lines (**Figure 4D** and **Supplementary figure 6**) suggest that  
242 phosphorylation by PPKs affects the stability of RCD1. PPK-mediated phosphorylation of proteins has  
243 been shown to impact protein stability by targeting proteins for degradation (Ni *et al*, 2016; Liu *et al*,  
244 2017; Chen *et al*, 2018). To further address this question, we analyzed RCD1 levels in triple *ppk*  
245 mutant plants. Immunoblot analysis of *ppk124* and *ppk234* with an RCD1-specific antibody revealed  
246 increased RCD1 levels compared to wild type plants (**Figure 5A**). Furthermore, in accordance with  
247 earlier results (Shapiguzov *et al*, 2019), higher accumulation of native RCD1, such as in triple *ppk*  
248 mutants, coincided with lower resistance of plants to MV compared to wild type (**Figure 5B**). These  
249 data suggest that PPK-dependent phosphorylation of RCD1 plays an important regulatory role for  
250 RCD1 protein stability and function.

251

252

253 **DISCUSSION**

254 Plants continuously reprogram their gene expression in response to environmental stimuli. In nature,  
255 numerous simultaneous signals and cues have to be processed and integrated to achieve an adequate  
256 and balanced response. This can be accomplished e.g., with hub proteins which integrate signals from  
257 different sources and adjust the activity of transcription factors to ensure appropriate responses (Bugge  
258 *et al*, 2018; Vandereyken *et al*, 2018; Jespersen & Barbar, 2020). Hub proteins frequently interact with  
259 many different protein partners, including transcription factors, to provide a flexible system which can  
260 simultaneously adjust several cellular functions according to changes in the surrounding environment.  
261 The RCD1 protein has been suggested in several studies to be such a hub protein (Jaspers *et al*, 2009;  
262 Hiltcher *et al*, 2014, Bugge *et al*, 2018; Shapiguzov *et al*, 2019; Jespersen & Barbar, 2020).  
263 Accordingly, disruption of the *RCD1* gene results in highly pleiotropic phenotypes and altered  
264 expression of a large number of genes (Ahlfors *et al*, 2004; Jaspers *et al*, 2009; Teotia & Lamb 2009,  
265 Brosché *et al*, 2014). Interaction of RCD1 with such a great variety of proteins is facilitated by its IDRs  
266 (IDR3 and IDR4), which enable RCD1 to adjust its final conformation upon binding to its interaction  
267 partners (Kragelund *et al*, 2012; O’Shea *et al*, 2017). In addition, other factors, such as recognition of  
268 signaling molecules or regulation of protein stability can contribute to the versatility of hub proteins,  
269 including RCD1.

270 **RCD1 and PARylation**

271 Protein PARylation is a transient post-translational modification that has been associated with  
272 adjustment of development and response to stress conditions in plants (Briggs & Bent, 2011; Lamb *et al*  
273 *et al*, 2012; Feng *et al*, 2015). While the inventories of PARPs and PARGs have been defined in  
274 Arabidopsis (Vainonen *et al*, 2016; Rissel & Peiter, 2019), so far only a limited number of proteins  
275 have been reported to be PARylated in plants. These include PARPs (Babiychuk *et al*, 1998; Feng *et al*,  
276 2015), histones (Whitby *et al*, 1979; Willmitzer 1979) and the nuclear protein DAWDLE involved in  
277 micro-RNA processing (Feng *et al*, 2016). Nuclear Cajal bodies have also been linked to active PARPs  
278 in plants (Love *et al*, 2017). The so-called “PAR readers”, proteins which non-covalently bind PAR  
279 (Teloni & Altmeyer, 2016; Gupte *et al*, 2017), have thus far remained unidentified in plants. It has been  
280 suggested that the PAR polymer provides an interaction platform for PAR reader proteins to modulate  
281 cellular responses, including chromatin remodeling, protein degradation and cell death (Kim *et al*,  
282 2020). Our biochemical analyses revealed that RCD1 binds PAR and that the interaction is mediated by

283 the WWE- and PARP-like-domains in a cooperative fashion. This suggests that RCD1 functions as a  
284 PAR-binding protein *in vivo*, making it a novel PAR reader protein described in plants.

285 In mammalian cells, PAR colocalizes with PAR-binding proteins in NBs (Ahel *et al*, 2008). The  
286 localization of RCD1 in NBs reported in this study was compromised if either the WWE- or the PARP-  
287 like-domain was removed. Furthermore, NB localization was suppressed by 3MB, a nicotinamide  
288 analog that inhibits PARP activity (**Figure 2**). Taken together, these observations suggest that  
289 localization of RCD1 to NBs was PAR-dependent. The molecular mechanisms whereby PAR  
290 participates in the formation of NBs and the recruitment of RCD1 therein, however, remain unknown.  
291 While the WWE-PARP module of RCD1 interacts with PAR, the C-terminal RST-domain of RCD1  
292 binds many different transcription factors (Jaspers *et al*, 2009, 2010). Thus, one possible mode of  
293 RCD1 action could be the PAR-dependent recruitment of transcription factors to various nuclear  
294 locations, including PAR-dependent NBs, PARylated histones or other PARylated chromatin-  
295 associated proteins. This would make the PAR reader RCD1 a scaffold component that introduces its  
296 partner transcription factors to specific locations in the nucleus or the chromatin.

297 By recruiting transcription factors to PARylated chromatin components, both activation (Hiltscher *et*  
298 *al*, 2014) and repression (Vainonen *et al*, 2012; Shapiguzov *et al*, 2019) of these transcription factors  
299 could be achieved, depending on whether they would be brought in contact with actively transcribed  
300 chromatin, or targeted for degradation. Analysis of WWE-domain proteins in animals has shown that  
301 the WWE-domains co-exist in a protein not only with PARP-/PARP-like-domains, but also with E3  
302 ubiquitin-ligase domains (Aravind 2001; Wang *et al*, 2012) which are involved in proteasomal  
303 degradation. Intriguingly, a significant fraction of transcription factors interacting with RCD1 are  
304 known to be regulated by proteasomal degradation (Qin *et al*, 2008; Ni *et al*, 2017; Favero *et al*, 2020).  
305 Furthermore, gene ontology analysis of altered gene expression in the *rcd1* mutant revealed enrichment  
306 in ubiquitin-proteasome-pathway associated genes (Jaspers *et al* 2009). This supports a functional link  
307 between RCD1 and the nuclear proteasomal apparatus in Arabidopsis and suggests an evolutionary  
308 conserved link of PARylation and PAR readers with proteasomal degradation.

### 309 **Phosphorylation in RCD1 regulation**

310 Hub proteins are often targets for multiple regulatory modifications enabling their involvement in a  
311 variety of upstream signaling processes. For example, RCD1 has recently been shown to perceive

312 signals from organelles through thiol redox relay (Shapiguzov *et al*, 2019). Protein phosphorylation is  
313 another example of a ubiquitous post-translational protein modification that plays a major role in  
314 almost all physiological processes (Mergner *et al*, 2020). RCD1 is an *in vivo* phosphoprotein; overall,  
315 13 phospho-peptides harboring potentially 30 phosphosites have been identified after  
316 immunoprecipitation of RCD1 from protein extracts. Notably, these phosphosites were enriched in the  
317 IDRs at the N-terminus as well as between the WWE-, PARP-like-, and RST-domains of RCD1  
318 (**Figure 4A**). It has been shown that protein kinases preferentially target IDRs, and that  
319 phosphorylation can trigger disorder-to-order transitions of the protein structure (Iakoucheva *et al*,  
320 2004; Bah & Forman-Kay, 2016). For example, phosphorylation of C-terminal IDRs of RCD1 may  
321 assist protein folding or adjust its conformation to allow interaction with other proteins through the  
322 RST-domain. Structural analysis of RCD1 *in vitro* has shown that the disordered parts of the RST-  
323 domain adapt their final folding upon interaction with different transcription factors (Bugge *et al*, 2018;  
324 Shapiguzov *et al*, 2019). Additional phosphorylation of IDRs flanking the RST-domain (IDR3 and  
325 IDR4) may influence the structure of RCD1 and its interaction with transcription factors *in vivo*.

326 In addition to C-terminal phosphopeptides flanking the RST-domain, we identified a phosphorylation  
327 hotspot in IDR2 between the WWE- and the PARP-like-domains targeted by PPKs. IDR2 has been  
328 shown to be important for homo- or heterodimerization of RCD1 and its closest homolog SRO1  
329 (Wirthmüller *et al*, 2018). Consequently, phosphorylation of IDR2 may affect the overall scaffolding  
330 structure of RCD1 and therefore regulate a wide variety of protein-protein interactions. In a recent  
331 study, IDR2 was reported to be required for the interaction between RCD1 and the oomycete effector  
332 protein HaRxL106 that prevents activation of plant immunity (Wirthmüller *et al*, 2018). Similarly, a  
333 *Phytophthora* RxLR effector has been shown to prevent relocalization of two tobacco NAC  
334 transcription factors from the endoplasmic reticulum to nucleus, which promoted disease progression  
335 (McLellan *et al*, 2013). Interestingly these tobacco NAC transcription factors, NTP1 and NTP2, are  
336 homologs of Arabidopsis ANAC013 and ANAC017, which are negatively regulated by RCD1  
337 (Shapiguzov *et al*, 2019). Furthermore, it has been shown that ASK $\alpha$ , a potential upstream kinase of  
338 RCD1, has been contributing to plant immunity by modulating the oxidative pentose phosphate  
339 pathway (Stampfl *et al*, 2016). These results link RCD1 to the regulation of plant immunity and the  
340 phosphorylation of IDR2 appears to be involved in these processes.

341 It seems likely that phosphorylation of RCD1 by PPKs regulates RCD1 stability. The endogenous  
342 levels of RCD1 were higher in *ppk124* and *ppk234* triple mutants (**Figure 5A**) and in transgenic plants  
343 where *rcd1* was complemented with the (RCD1<sup>S/T</sup>IDR2<sup>A</sup>) construct (**Figure 4D**). Accordingly, the  
344 *ppk124* and *ppk234* triple mutants exhibited increased sensitivity to MV as compared to wild type.  
345 Interestingly expression of the RCD1<sup>S/T</sup>IDR2<sup>A</sup> form in *rcd1* led to only partial complementation of  
346 *rcd1* MV tolerance. This suggests that phosphorylation of IDR2 is implicated not only in RCD1  
347 turnover alone or in complex with transcription factors but also in its function as transcriptional co-  
348 regulator.

349 Phosphorylation of proteins by PPKs has been connected to protein stability earlier (Liu *et al*, 2017; Ni  
350 *et al*, 2017; Chen *et al*, 2018). Ni *et al* (2017) described that PPKs phosphorylated the phyB-PIF3  
351 complex upon light exposure, thereby targeting it for degradation - with an additional unknown factor  
352 X involved in the process. Intriguingly, RCD1 interacts with several PIFs, including PIF3 (Jaspers *et*  
353 *al*, 2009), which also localize to NBs (Favero, 2020). Moreover, PIF3 has been connected to retrograde  
354 signaling from the chloroplast (Martin *et al.*, 2016), a process where RCD1 also plays a role  
355 (Shapiguzov *et al*, 2019). The data presented here reveal a mechanism by which RCD1 levels could be  
356 regulated *via* phosphorylation and suggest that PPKs might be involved in the MV-induced decrease in  
357 RCD1 protein abundance shown in Shapiguzov *et al* (2019). This represents posttranslational control of  
358 a negative transcriptional co-regulator. Such regulation would allow PPKs to adjust the functions of  
359 RCD1 in response to environmental stimuli.

## 360 **Conclusions**

361 Our results unveil a complex function and posttranslational regulation of RCD1 (**Figure 6**). RCD1 is  
362 targeted by its bipartite N-terminal NLS sequence to the nucleus (#1 in Figure 6) where it interacts with  
363 various proteins, including PPKs (#2) and various transcription factors (#3), and accumulates in a PAR-  
364 dependent manner in NBs of unknown nature and composition (#4). Localization of RCD1 to NBs and  
365 binding of PAR (#4) are mediated by its WWE- and the PARP-like-domains. The C-terminal RST-  
366 domain interacts with transcription factors (#3 in Fig. 6; Jaspers *et al*, 2009, 2010; Bugge *et al*, 2018).  
367 The localization of PPKs to NBs is RCD1-dependent; otherwise the exact order of these events (##2, 3,  
368 and 4) is undetermined.

369 The ability of RCD1 to interact with a large number of transcription factors supports a function as a  
370 hub protein which integrates various developmental as well as environmental signals. PAR-dependent  
371 localization of RCD1 in NBs suggests that the recognition of PARylated proteins by RCD1 acts as  
372 “guidance system” to correctly position RCD1-protein-complexes along the chromatin or in specific  
373 sub-nuclear domains. Taken together, according to the data presented here, RCD1 represents the first  
374 described nuclear PAR-reader in plants. Therefore, our model proposes a new mechanism of fine-  
375 tuning transcriptional regulation, involving PAR and a PAR-reader RCD1.

376

377



378 **MATERIALS AND METHODS**

379 ***Plants, mutants and chemical treatments.*** *Arabidopsis thaliana* plants were grown on soil (peat:  
380 vermiculite = 1:1) under white luminescent light (220-250  $\mu\text{mol m}^{-2} \text{s}^{-1}$ ) at a 12-hour photoperiod and  
381 22/18 °C. Seedlings were grown for 10 days on 1 x MS basal medium (Sigma) with 0.5 % Phytigel  
382 (Sigma). *Arabidopsis rcd1-4* mutant (GK-229D11) was used as a background for all complementation  
383 lines. The *ppk* triple mutants were kindly provided by Dr Dmitri Nusinow (Donald Danforth Plant  
384 Science Center, St. Louis) and have been described in Huang *et al.*, (2016). Treatments with chemicals  
385 methyl viologen (MV, 0.1 or 1  $\mu\text{M}$ , as indicated in the figures) and 3-methoxybenzamide (3MB, 10  
386 mM) were performed on leaf discs floating on Milli-Q water supplemented with 0.05% Tween 20  
387 (Sigma), overnight at room temperature or at 4°C, accordingly.

388 ***Plasmids.*** Full-length AtRCD1, the WWE-domain (amino acids 1-155), RCD1 $\Delta$ WWE (consisting of  
389 PARP- and RST-domains, amino acids 241-589) and the C-terminal part of RCD1 including the RST-  
390 domain (amino acids 468-589), were cloned into pGEX4T-1 for N-terminal GST fusion using primers  
391 listed in Supplementary table 3. Full-length AtRCD1 was also cloned into the pET8c vector for N-  
392 terminal His-fusion (Jaspers *et al.*, 2010). For generating N-terminal GST-fusion constructs, PPK1-4  
393 cDNAs were cloned into pGEX6P-1, and ASK cDNAs into pGEX4T-1. The kinase-dead ASK loss-of-  
394 function constructs contain a Lys-Arg mutation in the kinase activation loop.

395 For generating a GST fusion construct of RCD1 where the IDR2 is non-phosphorylatable (GST-  
396 RCD1<sup>S/T</sup>IDR2<sup>A</sup>), all phospho-serine and phospho-threonine residues within IDR2 were mutated to  
397 alanine residues by gene synthesis (Genescript Biotech, Netherlands).

398 To generate the RCD1-Venus construct, RCD1 cDNA was fused to the *UBIQUITIN10* promoter region  
399 and to the C-terminal triple Venus YFP tag in a MultiSite Gateway reaction as described in Siligato *et*  
400 *al.*, (2016). The  $\Delta$ WWE (missing the residues 90-151),  $\Delta$ PARP (missing the residues 304-443) and  
401  $\Delta$ RST (missing the residues 462-589) deletions were introduced by PCR using primers listed in  
402 Supplementary table 3 and end-joining using In-Fusion (Clontech).

403 Construction of transgenic lines expressing HA-tagged RCD1 (RCD1-3xHA) is described in Jaspers *et*  
404 *al.*, (2009). RCD1 $nls$ -HA variant was made using the vector pDONR/Zeo that contained the RCD1  
405 promoter followed by the wild-type genomic RCD1 sequence (Jaspers *et al.*, 2009). PCR was  
406 performed with Q5 High-Fidelity DNA Polymerase (New England Biolabs) and the primers listed in  
407 the Supplementary table 3. After sequential mutation of the two parts of the bipartite NLS, the

408 construct was transferred to the Gateway pGWB13 binary vector and introduced into the plants as  
409 described in Jaspers *et al*, (2009).

410 For generating epitope-tagged PPK fusions, the coding sequences of the four *PPK* genes lacking their  
411 stop codons were cloned into NcoI/XhoI-digested pENTR4 using In-Fusion enzyme (Clontech). The  
412 *PPK* coding sequences were then recombined by Gateway® Clonase II reactions into pH7WGR2  
413 (Karimi *et al*, 2002) or pGWB414 (Nakagawa *et al*, 2007) to create RFP and 3xHA-tagged variants,  
414 respectively.

415 ***Spectroscopic measurements of photosynthesis.*** Chlorophyll fluorescence was measured by MAXI  
416 Imaging PAM (Walz, Germany) essentially as described in Shapiguzov *et al*, (2019). PSII  
417 photoinhibition protocol consisted of repetitive 1-hour periods of blue actinic light (450 nm, 80  $\mu\text{mol}$   
418  $\text{m}^{-2} \text{s}^{-1}$ ) each followed by a 20-min dark adaptation, then  $F_0$  and  $F_m$  measurement. PSII photochemical  
419 yield was calculated as  $F_v/F_m = (F_m - F_0)/F_m$ . The assays were performed in 96-well plates. In each assay  
420 leaf discs from at least 4 individual plants were analyzed. Each assay was reproduced at least three  
421 times.

422 ***SDS-PAGE and immunoblotting.*** For immunoblotting of total plant extracts, the plant material was  
423 frozen immediately after treatments in liquid nitrogen and ground. Total proteins were extracted in  
424 SDS extraction buffer (50 mM Tris, pH 7.8, 2 % SDS, 1 x protease inhibitor cocktail; P9599, Sigma), 2  
425 mg/ mL NaF) for 20 min at 37°C and centrifuged at 18 000 x g for 10 min. Supernatants were  
426 normalized for protein concentration and resolved by SDS-PAGE. After electrophoresis, proteins were  
427 electroblotted to PVDF membrane and probed with specific antibodies:  $\alpha\text{HA}$  (Roche),  $\alpha\text{GFP}$  (Milteny  
428 Biotech),  $\alpha\text{GST}$  (Sigma),  $\alpha\text{PAR}$  (Trevigen),  $\alpha\text{RCD1}$  (Shapiguzov *et al*, 2019), and  $\alpha\text{AOX1/2}$  (Agrisera  
429 AS04 054). The signal was visualized by ECL Prime chemiluminescence reagents (GE Healthcare).

430 ***Confocal microscopy.*** The subcellular localization of RCD1 in stable expression Arabidopsis line was  
431 analyzed by confocal microscopy with a Leica SP5 II HCS inverted microscope using a solid-state blue  
432 laser was used for visualizing YFP and chloroplast autofluorescence (detection with 521–587 and 636–  
433 674 nm range, respectively). For co-localization studies of RCD1-Venus and PPK-RFP fusion  
434 constructs, the binary plasmids were transformed into *A. tumefaciens* strain GV3101 pMP90. Proteins  
435 were transiently expressed in *N. benthamiana* leaves as described below for co-immunoprecipitation  
436 assays. YFP was excited using a 488 nm laser with a detection window of 519-556 nm and RFP was  
437 excited using a 561 nm laser with detection at 599-657 nm.

438 **Protein expression and purification.** Fusion proteins were expressed in *E.coli* BL21 (DE3) Codon Plus  
439 strain and purified using GSH- or Ni<sup>2+</sup>- Sepharose beads (GE Healthcare) according to manufacturer  
440 instructions as described before (Jaspers *et al*, 2009; Jaspers *et al*, 2010). The N-terminal GST-tagged  
441 WWE-domain of RNF146 (amino acids 100-175) was expressed and purified as described in Zhang *et*  
442 *al*, (2011).

443 **Poly(ADP-ribose) dot-blot assay.** Purified His and GST fusion proteins or GST alone (500 ng) were  
444 blotted onto nitrocellulose membrane (BioRad). The nitrocellulose membrane was rinsed with TBS-T  
445 buffer (10 mM Tris-HCl at pH 7.4, 150 mM NaCl and 0.05 % Tween 20) three times. The membrane  
446 was incubated with 100 nM of purified PAR (Trevigen, 4336-100-01, 10 μM stock, polymer size 2-300  
447 units) for 1 h at room temperature. After 5 washes with TBS-T and TBS-T containing 1 M NaCl, the  
448 membrane was blocked with 5 % milk followed by immunoblotting with mouse αPAR (Trevigen) or  
449 αGST (Sigma) antibody.

450 **Surface plasmon resonance.** Recombinant RCD1-His and GST-RCD1ΔWWE proteins were coupled  
451 to a Biacore CM5 sensor chip *via* amino-groups. PAR (625 nM) was profiled at a flow rate of 30  
452 mL/min for 300 s, followed by 600 s flow of wash buffer (10 mM HEPES, pH 7.4, 150 mM NaCl, 3  
453 mM EDTA, 0.05% Surfactant P20). Mono ADP-ribose and cyclic ADP-ribose were profiled at 1 mM  
454 concentration. After analysis in BiaEvaluation (Biacore), the normalized resonance units were plotted  
455 over time with the assumption of one-to-one binding.

456 **Transient protein expression and co-immunoprecipitation.** Binary vectors harbouring RCD1-GFP or  
457 PPK-3xHA fusions were transformed into *A. tumefaciens* strain GV3101 pMP90. For expression,  
458 Agrobacteria were scraped from selective YEB plates and resuspended in infiltration medium (10 mM  
459 MES pH 5.6, 10 mM MgCl<sub>2</sub>) and the OD<sub>600</sub> was adjusted to 0.8. To suppress transgene silencing,  
460 Agrobacteria expressing the tomato bushy stunt virus 19K silencing suppressor were co-infiltrated.  
461 After adding acetosyringone to a final concentration of 100 μM and incubation for 2 h at room  
462 temperature, Agrobacteria were mixed in a ratio of 1:1:2 (19K) and infiltrated into *N. benthamiana*  
463 leaves. Infiltrated leaf tissue was harvested 72 h later and proteins were extracted by grinding leaf  
464 tissue in liquid nitrogen followed by resuspension in extraction buffer (50 mM Tris-HCl pH 7.5, 150  
465 mM NaCl, 10 % Glycerol, 1 mM EDTA, 5 mM DTT, 1 x protease inhibitor cocktail [P9599, Sigma],  
466 10 μM MG132) at a ratio of 2 mL / g FW. Protein extracts were centrifuged at 20 000 x g / 4 °C / 20  
467 min and a fraction of the supernatant was saved as ‘input’ sample. 15 μL of αGFP-nanobody:Halo:His6

468 magnetic beads (Chen *et al*, 2018) were added to 1.5 mL of protein extract followed by incubation on a  
469 rotating wheel at 4 °C for 5 min. The beads were washed 3 times with 1 mL extraction buffer using a  
470 magnetic tube rack and then boiled in 80 µL SDS sample buffer to elute protein from the beads. For  
471 immunoblots, protein samples were separated by SDS-PAGE and electro-blotted onto PVDF  
472 membrane. Antibodies used were αGFP (210-PS-1GP, Amsbio) and αHA (11867423001, Sigma).

473 **Kinase activity assays.** *In vitro* kinase assays using recombinant proteins were performed in a total  
474 volume of 20 µL of kinase buffer (20 mM HEPES, pH 7.5, 15 mM MgCl<sub>2</sub>, and 5 mM EGTA). The  
475 reaction was started with 2 µCi [ $\gamma$ -<sup>32</sup>P]ATP and incubated at room temperature for 30 min. The reaction  
476 was stopped by the addition of 5 µL of 4x SDS loading buffer. Proteins were resolved by SDS-PAGE  
477 and the gel was dried and exposed overnight to a phosphor imager screen. For the kinase activity test,  
478 GST-PPKs were tested against 5 µg myelin basic protein (MBP; Sigma Aldrich) and 5 µg Casein in 0.1  
479 M Tris pH 8.8 (Sigma). For identification of *in vitro* phosphorylation sites by LC-MS/MS, 1.5 mM  
480 unlabeled ATP was used in the kinase buffer. The proteins were separated by SDS-PAGE, followed by  
481 Coomassie Brilliant Blue staining and were digested by trypsin (Promega).

482 **LC-MS/MS.** Phosphopeptides were enriched from tryptic digests using TiO<sub>2</sub> microcolumns (GL  
483 Sciences Inc., Japan) as described in Larsen *et al*, (2005). Enriched phosphopeptides were analyzed by  
484 a Q Exactive mass spectrometer (Thermo Fisher Scientific) connected to Easy NanoLC 1000 (Thermo  
485 Fisher Scientific). Peptides were first loaded on a trapping column and subsequently separated inline on  
486 a 15-cm C18 column (75 µm × 15 cm, ReproSil-Pur 5 µm 200 Å C18-AQ, Dr. Maisch HPLC). The  
487 mobile phase consisted of water with 0.1% (v/v) formic acid (solvent A) or acetonitrile/water (80:20  
488 [v/v]) with 0.1% (v/v) formic acid (solvent B). A linear 60-min gradient from 6 to 42% (v/v) B was  
489 used to elute peptides. Mass spectrometry data were acquired automatically by using Xcalibur 3.1  
490 software (Thermo Fisher Scientific). An information-dependent acquisition method consisted of an  
491 Orbitrap mass spectrometry survey scan of mass range 300 to 2000 m/z (mass-to-charge ratio) followed  
492 by higher-energy collisional dissociation (HCD) fragmentation for 10 most intense peptide ions. Raw  
493 data were searched for protein identification by Proteome Discoverer (version 2.2) connected to in-  
494 house Mascot (v. 2.6.1) server. Phosphorylation site locations were validated using phosphoRS  
495 algorithm. A SwissProt database (<https://www.uniprot.org/>) with a taxonomy filter Arabidopsis. Two  
496 missed cleavages were allowed. Peptide mass tolerance ± 10 ppm and fragment mass tolerance ± 0.02  
497 D were used. Carbamidomethyl (C) was set as a fixed modification and Met oxidation, acetylation of

498 protein N-terminus, and phosphorylation of Ser and Thr were included as variable modifications. Only  
499 peptides with a false discovery rate of 0.01 were used.

500

#### 501 ACKNOWLEDGEMENTS

502 We thank Mr Damien Marchese and Dr. Melanie Carmody for the help in generating the transgenic  
503 lines. We thank Dr. Dmitri Nusinow for providing the seeds of *ppk* triple mutants. We thank Maria  
504 Aatonen and Maria Semenova for help in Biacore experiments which were performed at the  
505 Biomolecular Interaction Unit, Faculty of Biological and Environmental Sciences, University of  
506 Helsinki. We thank Mika Molin and Marko Crivaro for help with confocal microscopy at the Light  
507 Microscopy Unit of the Institute of Biotechnology, University of Helsinki. Mass spectrometry analyses  
508 were performed at the Turku Proteomics Facility, supported by Biocenter Finland. This work was  
509 supported by the University of Helsinki (JK); the Academy of Finland Centre of Excellence programs  
510 (2006-11; and 2014-19; JK) and Research Grant (Decision 250336; JK). MW acknowledges funding  
511 from the Academy of Finland (Decisions 275632, 283139, 312498, and 323917). LW acknowledges  
512 funding by the German Research Foundation (DFG; grant WI 3670/2-1) and core funding from the  
513 Leibniz Institute for Plant Biochemistry (IPB) and the FU Berlin Dahlem Centre of Plant Sciences.

#### 514 AUTHOR CONTRIBUTION

515 JV, AS, JKW, RG, CJ, LW, MW, and JK conceived and designed experiments. JV, AS, JKW, RDM,  
516 RG, ID, NB, and LW carried out experiments. JV, AS, JKW, RDM, RG, ID, NB, CJ, LW, MW, and  
517 JK analyzed the data. JV, AS, JKW, LW, and JK wrote the article. All authors read and contributed to  
518 the final article.

519 REFERENCES

- 520 **Adams-Phillips L, Briggs AG, Bent AF. 2010.** Disruption of poly(ADP-ribosylation) mechanisms  
521 alters responses of Arabidopsis to biotic stress. *Plant Physiology* **152**:267–280
- 522 **Ahel I, Ahel D, Matsusaka T, Clark AJ, Pines J, Boulton SJ, West SC. 2008.** Poly(ADP-ribose)-  
523 binding zinc finger motifs in DNA repair/checkpoint proteins. *Nature* **451**:81–85.
- 524 **Ahlfors R, Lång S, Overmyer K, Jaspers P, Brosché M, Tauriainen A, Kollist H, Tuominen H,**  
525 **Belles-Boix E, Piippo M et al. 2004.** Arabidopsis RADICAL-INDUCED CELL DEATH1 belongs to  
526 the WWE protein-protein interaction domain protein family and modulates abscisic acid, ethylene, and  
527 methyl jasmonate responses. *Plant Cell* **16**:1925-1937.
- 528 **Aravind L. 2001.** The WWE domain: a common interaction module in protein ubiquitination and ADP  
529 ribosylation. *Trends in Biochemical Sciences* **26**:273-275.
- 530 **Babiychuk E, Cottrill PB, Storozhenko S, Fuangthong M, Chen Y, O'Farrell MK, Van Montagu**  
531 **M, Inzé D, Kushnir S. 1998.** Higher plants possess two structurally different poly(ADP-ribose)  
532 polymerases. *The Plant Journal* **15**:635-645.
- 533 **Bah A, Forman-Kay JD. 2016.** Modulation of intrinsically disordered protein function by post-  
534 translational modifications. *Journal of Biological Chemistry* **291**:6696-6705.
- 535 **Briggs AG, Bent AF. 2011.** Poly(ADP-ribosylation) in plants. *Trends in Plant Science* **16**:372–380.
- 536 **Brosché M, Blomster T, Salojärvi J, Cui F, Sipari N, Leppälä J, Lamminmäki A, Tomai G,**  
537 **Narayanasamy S, Reddy RA et al. 2014.** Transcriptomics and functional genomics of ROS-induced  
538 cell death regulation by RADICAL-INDUCED CELL DEATH1. *PLoS Genetics* **10**:e1004112.
- 539 **Bugge K, Staby L, Kemplen KR, O'Shea C, Bendsen SK, Jensen MK, Olsen JG, Skriver K,**  
540 **Kragelund BB. 2018.** Structure of Radical-Induced Cell Death1 hub domain reveals a common  $\alpha$ -  
541 scaffold for disorder in transcriptional networks. *Structure* **26**:734-746.
- 542 **Chen C, Masi R, Lintermann R, Wirthmueller L. 2018.** Nuclear import of *Arabidopsis* poly(ADP-  
543 ribose) polymerase 2 is mediated by importin- $\alpha$  and a nuclear localization sequence located between  
544 the predicted SAP domains. *Frontiers in Plant Science* **9**:1581.
- 545 **Chen HH, Qu L, Xu ZH, Zhu JK, Xue HW. 2018.** EL1-like casein kinases suppress ABA signaling  
546 and responses by phosphorylating and destabilizing the ABA receptors PYR/PYLs in *Arabidopsis*.  
547 *Molecular Plant* **11**:706-719.



- 548 **Christensen LF, Staby L, Bugge K, O'Shea C, Kragelund BB, Skriver K. 2019.** Evolutionary  
549 conservation of the intrinsic disorder-based Radical-Induced Cell Death1 hub interactome. *Scientific*  
550 *Reports* **9**:18927.
- 551 **Christians MJ, Gingerich DJ, Hua Z, Lauer TD, Vierstra RD. 2012.** The light-response BTB1 and  
552 BTB2 proteins assemble nuclear ubiquitin ligases that modify phytochrome B and D signaling in  
553 Arabidopsis. *Plant Physiology* **160**:118-134.
- 554 **Cohen MS, Chang P. 2018.** Insights into the biogenesis, function, and regulation of ADP-ribosylation.  
555 *Nature Chemical Biology* **14**:236-243.
- 556 **DaRosa PA, Wang Z, Jiang X, Pruneda JN, Cong F, Klevit RE, Xu W. 2015.** Allosteric activation  
557 of the RNF146 ubiquitin ligase by a poly(ADP-ribosylation) signal. *Nature* **517**:223-226.
- 558 **Favero DS. 2020.** Mechanisms regulating PIF transcription factor activity at the protein level.  
559 *Physiologia Plantarum*. doi: 10.1111/ppl.13075.
- 560 **Feng B, Liu C, de Oliveira MV, Intorne AC, Li B, Babilonia K, de Souza Filho GA, Shan L, He P.**  
561 **2015.** Protein poly(ADP-ribosylation) regulates *Arabidopsis* immune gene expression and defense  
562 responses. *PLoS Genetics* **11**:e1004936
- 563 **Feng B, Ma S, Chen S, Zhu N, Zhang S, Yu B, Yu Y, Le B, Chen X, Dinesh-Kumar SP et al. 2016.**  
564 PARylation of the Forkhead-associated domain protein DAWDLE regulates plant immunity. *EMBO*  
565 *Reports* **17**:1799-1813.
- 566 **Fujibe T, Saji H, Arakawa K, Yabe N, Takeuchi Y, Yamamoto KT. 2004.** A methyl viologen-  
567 resistant mutant of Arabidopsis, which is allelic to ozone-sensitive *rcd1*, is tolerant to supplemental  
568 ultraviolet-B irradiation. *Plant Physiology* **134**:275-285.
- 569 **Gupte R, Liu Z, Kraus WL. 2017.** PARPs and ADP-ribosylation: recent advances linking molecular  
570 functions to biological outcomes. *Genes & Development* **31**:101-126.
- 571 **Hiltscher H, Rudnik R, Shaikhali J, Heiber I, Mellenthin M, Meirelles Duarte I, Schuster G,**  
572 **Kahmann U, Baier M. 2014.** The radical induced cell death protein 1 (RCD1) supports transcriptional  
573 activation of genes for chloroplast antioxidant enzymes. *Frontiers in Plant Science* **5**:475.
- 574 **Huang H, Alvarez S, Bindbeutel R, Shen Z, Naldrett MJ, Evans BS, Briggs SP, Hicks LM, Kay**  
575 **SA, Nusinow DA. 2016.** Identification of Evening complex associated proteins in *Arabidopsis* by  
576 affinity purification and mass spectrometry. *Molecular and Cellular Proteomics* **15**:201-217.

- 577 **Iakoucheva LM, Radivojac P, Brown CJ, O'Connor TR, Sikes JG, Obradovic Z, Dunker AK.**  
578 **2004.** The importance of intrinsic disorder for protein phosphorylation. *Nucleic Acids*  
579 *Research* **32**:1037-1049.
- 580 **Jaspers P, Blomster T, Brosché M, Salojärvi J, Ahlfors R, Vainonen JP, Reddy RA, Immink R,**  
581 **Angenent G, Turck F et al. 2009.** Unequally redundant RCD1 and SRO1 mediate stress and  
582 developmental responses and interact with transcription factors. *The Plant Journal* **60**:268-279.
- 583 **Jaspers P, Overmyer K, Wrzaczek M, Vainonen JP, Blomster T, Salojärvi J, Reddy RA,**  
584 **Kangasjärvi J. 2010.** The RST and PARP-like domain containing SRO protein family: analysis of  
585 protein structure, function and conservation in land plants. *BMC Genomics* **11**:170.
- 586 **Jespersen N, Barbar E. 2020.** Emerging Features of Linear Motif-Binding Hub Proteins. *Trends in*  
587 *Biochemical Sciences* **45**:375-384.
- 588 **Jungmichel S, Rosenthal F, Altmeyer M, Lukas J, Hottiger MO, Nielsen ML. 2013.** Proteome-  
589 wide identification of poly(ADP-Ribosyl)ation targets in different genotoxic stress responses.  
590 *Molecular Cell* **52**:272–285.
- 591 **Karimi M, Inzé D, Depicker A. 2002.** GATEWAY vectors for *Agrobacterium*-mediated plant  
592 transformation. *Trends in Plant Science* **7**:193-195.
- 593 **Kim DS, Challa S, Jones A, Kraus WL. 2020.** PARPs and ADP-ribosylation in RNA biology: from  
594 RNA expression and processing to protein translation and proteostasis. *Genes & Development* **34**:302-  
595 320.
- 596 **Kragelund BB, Jensen MK, Skriver K. 2012.** Order by disorder in plant signaling. *Trends in Plant*  
597 *Science* **17**:625-32.
- 598 **Lamb RS, Citarelli M, Teotia S. 2012.** Functions of the poly(ADP-ribose) polymerase superfamily in  
599 plants. *Cellular and Molecular Life Sciences* **69**:175–189.
- 600 **Leung AKL. 2017.** PARPs. *Current Biology* **27**:R1256-R1258.
- 601 **Liu Q, Wang Q, Deng W, Wang X, Piao M, Cai D, Li Y, Barshop WD, Yu X, Zhou T et al. 2017.**  
602 Molecular basis for blue light-dependent phosphorylation of *Arabidopsis* cryptochrome 2. *Nature*  
603 *Communications* **8**:15234.
- 604 **Love AJ, Yu C, Petukhova NV, Kalinina NO, Chen J, Taliansky ME. 2017.** Cajal bodies and their  
605 role in plant stress and disease responses. *RNA Biology* **14**:779-790.
- 606 **Mao YS, Zhang B, Spector DL. 2011.** Biogenesis and function of nuclear bodies. *Trends in Genetics*  
607 **27**:295-306.

- 608 **Martello R, Leutert M, Jungmichel S, Bilan V, Larsen SC, Young C, Hottiger MO, Nielsen ML.**  
609 **2016.** Proteome-wide identification of the endogenous ADP-ribosylome of mammalian cells and tissue.  
610 *Nature Communications* **7**:12917.
- 611 **Martín G, Leivar P, Ludevid D, Tepperman JM, Quail PH, Monte E. 2016.** Phytochrome and  
612 Retrograde Signalling Pathways Converge to Antagonistically Regulate a Light-Induced  
613 Transcriptional Network. *Nature Communications* **7**:11431.
- 614 **McLellan H, Boevink PC, Armstrong MR, Pritchard L, Gomez S, Morales J, Whisson SC,**  
615 **Beynon JL, Birch PR. 2013.** An RxLR effector from *Phytophthora infestans* prevents re-localisation  
616 of two plant NAC transcription factors from the endoplasmic reticulum to the nucleus. *PLoS Pathogens*  
617 **9**:e1003670.
- 618 **Mergner J, Frejno M, List M, Papacek M, Chen X, Chaudhary A, Samaras P, Richter S, Shikata**  
619 **H, Messerer M et al. 2020.** Mass-spectrometry-based draft of the *Arabidopsis* proteome. *Nature*  
620 **579**:409-414.
- 621 **Nakagawa T, Suzuki T, Murata S, Nakamura S, Hino T, Maeo K, Tabata R, Kawai T, Tanaka K,**  
622 **Niwa Y et al. 2007.** Improved Gateway binary vectors: high-performance vectors for creation of fusion  
623 constructs in transgenic analysis of plants. *Bioscience Biotechnology, and Biochemistry* **71**: 2095-2100.
- 624 **Ni W, Xu SL, Gonzalez-Grandio E, Chalkley RJ, Huhmer AFR, Burlingame AL, Wang ZY,**  
625 **Quail PH. 2017.** PPKs mediate direct signal transfer from phytochrome photoreceptors to  
626 transcription factor PIF3. *Nature Communications* **8**:15236.
- 627 **O'Shea C, Staby L, Bendsen SK, Tidemand FG, Redsted A, Willemoës M, Kragelund BB,**  
628 **Skriver K. 2017.** Structures and short linear motif of disordered transcription factor regions provide  
629 clues to the interactome of the cellular hub protein Radical-induced Cell Death1. *Journal of Biological*  
630 *Chemistry* **292**:512-527.
- 631 **Overmyer K, Tuominen H, Kettunen R, Betz C, Langebartels C, Sandermann H Jr, Kangasjärvi**  
632 **J. 2000.** Ozone-sensitive *Arabidopsis rcd1* mutant reveals opposite roles for ethylene and jasmonate  
633 signaling pathways in regulating superoxide-dependent cell death. *Plant Cell* **12**:1849-1862.
- 634 **Palazzo L, Leidecker O, Prokhorova E, Dauben H, Matic I, Ahel I. 2018.** Serine is the major  
635 residue for ADP-ribosylation upon DNA damage. *Elife* **7**: e34334.
- 636 **Qin F, Sakuma Y, Tran LS, Maruyama K, Kidokoro S, Fujita Y, Fujita M, Umezawa T, Sawano**  
637 **Y, Miyazono K et al. 2008.** *Arabidopsis* DREB2A-interacting proteins function as RING E3 ligases  
638 and negatively regulate plant drought stress-responsive gene expression. *Plant Cell* **20**, 1693–1707.

- 639 **Reddy AS, Day IS, Göhring J, Barta A. 2012.** Localization and dynamics of nuclear speckles in  
640 plants. *Plant Physiology* **158**:67-77.
- 641 **Saidi Y, Hearn TJ, Coates JC. 2012.** Function and evolution of 'green' GSK3/Shaggy-like kinases.  
642 *Trends in Plant Science* **17**:39-46.
- 643 **Shapiguzov A, Vainonen JP, Hunter K, Tossavainen H, Tiwari A, Järvi S, Hellman M, Aarabi F,**  
644 **Alseekh S, Wybouw B et al. 2019.** Arabidopsis RCD1 coordinates chloroplast and mitochondrial  
645 functions through interaction with ANAC transcription factors. *Elife* **8**: e43284.
- 646 **Siligato R, Wang X, Yadav SR, Lehesranta S, Ma G, Ursache R, Sevilem I, Zhang J, Gorte M,**  
647 **Prasad K et al. 2016.** MultiSite Gateway-compatible cell type-specific gene-inducible system for  
648 plants. *Plant Physiology* **170**: 627-641.
- 649 **Simon L, Voisin M, Tatout C, Probst AV. 2015.** Structure and function of centromeric and  
650 pericentromeric heterochromatin in *Arabidopsis thaliana*. *Frontiers in Plant Science* **6**:1049.
- 651 **Song J, Keppler BD, Wise RR, Bent AF. 2015.** PARP2 Is the predominant poly(ADP-Ribose)  
652 polymerase in Arabidopsis DNA damage and immune responses. *PLoS Genetics* **11**:e1005200.
- 653 **Stampfl H, Fritz M, Dal Santo S, Jonak C. 2016.** The GSK3/Shaggy-Like Kinase ASK $\alpha$  Contributes  
654 to Pattern-Triggered Immunity. *Plant Physiology* **171**:1366-1377.
- 655 **Su Y, Wang S, Zhang F, Zheng H, Liu Y, Huang T, Ding Y. 2017.** Phosphorylation of histone H2A  
656 at Serine 95: a plant-specific mark involved in flowering time regulation and H2A.Z deposition. *Plant*  
657 *Cell* **29**:2197-2213.
- 658 **Teloni F, Altmeyer M. 2016.** Readers of poly(ADP-ribose): designed to be fit for purpose. *Nucleic*  
659 *Acids Research* **44**:993-1006.
- 660 **Teotia S, Lamb RS. 2009.** The paralogous genes *RADICAL-INDUCED CELL DEATH1* and *SIMILAR*  
661 *TO RCD ONE1* have partially redundant functions during Arabidopsis development. *Plant Physiology*  
662 **151**:180-198.
- 663 **Vainonen JP, Jaspers P, Wrzaczek M, Lamminmäki A, Reddy RA, Vaahtera L, Brosché M,**  
664 **Kangasjärvi J. 2012.** RCD1-DREB2A interaction in leaf senescence and stress responses in  
665 *Arabidopsis thaliana*. *Biochemical Journal* **442**:573-581.
- 666 **Vainonen JP, Shapiguzov A, Vaattovaara A, Kangasjärvi J. 2016.** Plant PARPs, PARGs and  
667 PARP-like proteins. *Current Protein and Peptide Science* **17**:713-723.
- 668 **Van Buskirk EK, Decker PV, Chen M. 2012.** Photobodies in light signaling. *Plant Physiology*  
669 **158**:52-60.

- 670 **Wang Z, Michaud GA, Cheng Z, Zhang Y, Hinds TR, Fan E, Cong F, Xu W. 2012.** Recognition of  
671 the iso-ADP-ribose moiety in poly(ADP-ribose) by WWE domains suggests a general mechanism for  
672 poly(ADP-ribosyl)ation-dependent ubiquitination. *Genes & Development* **26**:235-240.
- 673 **Wang Z, Casas-Mollano JA, Xu J, Riethoven JJ, Zhang C, Cerutti H. 2015.** Osmotic stress induces  
674 phosphorylation of histone H3 at threonine 3 in pericentromeric regions of *Arabidopsis thaliana*.  
675 *Proceedings of the National Academy of Sciences, USA* **112**:8487-8492.
- 676 **Wirthmueller L, Asai S, Rallapalli G, Sklenar J, Fabro G, Kim DS, Lintermann R, Jaspers P,**  
677 **Wrzaczek M, Kangasjärvi J et al. 2018.** *Arabidopsis* downy mildew effector HaRxL106 suppresses  
678 plant immunity by binding to RADICAL-INDUCED CELL DEATH1. *New Phytologist* **220**:232-248.
- 679 **Zhang Y, Liu S, Mickanin C, Feng Y, Charlat O, Michaud GA, Schirle M, Shi X, Hild M, Bauer**  
680 **A et al. 2011.** RNF146 is a poly(ADP-ribose)-directed E3 ligase that regulates axin degradation and  
681 Wnt signalling. *Nature Cell Biology* **13**:623-629.
- 682 **Zhang YJ, Wang JQ, Ding M, Yu YH. 2013.** Site-specific characterization of the Asp- and Glu-  
683 ADP-ribosylated proteome. *Nature Methods* **10**:981–984.
- 684 **Zheng H, Zhang F, Wang S, Su Y, Ji X, Jiang P, Chen R, Hou S, Ding Y. 2018.** MLK1 and MLK2  
685 coordinate RGA and CCA1 to regulate hypocotyl elongation in *Arabidopsis thaliana*. *Plant Cell* **30**:67-  
686 82.
- 687

Table 1: List of phosphosites identified *in vivo* or after *in vitro* kinase assay using PPKs.

| <b>Phosphopeptide</b>                                                | <b>Contained phosphosites</b>               | <b>Study</b>                                |
|----------------------------------------------------------------------|---------------------------------------------|---------------------------------------------|
| VLD <sub>ss</sub> RCEDGFGK                                           | S11, S12                                    | <i>in vitro</i> PPK (a)                     |
| AA <sub>s</sub> YAA <sub>Y</sub> VtGV <sub>s</sub> CAK               | S27, T33, S36                               | <i>in vivo</i> (b), <i>in vitro</i> PPK (a) |
| <i>LEIDVNGGEtPR</i>                                                  | T204                                        | <i>in vivo</i> (a, b)                       |
| <i>LNLEECsDEsGDNMMDDVPLAQR</i>                                       | S213, S216                                  | <i>in vitro</i> PPK (a)                     |
| <i>ssNEHYDEAtEDCsR</i>                                               | S230, S231, T239, S242, S244                | <i>in vivo</i> (b), <i>in vitro</i> PPK (a) |
| <i>KLEAAVsK</i>                                                      | S252                                        | <i>in vivo</i> (a), <i>in vitro</i> PPK (a) |
| <i>WDEtDAIVVsGAK</i>                                                 | T257, S263                                  | <i>in vivo</i> (b)                          |
| <i>LTGsEVLDK</i>                                                     | S270                                        | <i>in vitro</i> PPK (a)                     |
| F <sub>ss</sub> EIAEAR                                               | S301, S302                                  | <i>in vitro</i> PPK (a)                     |
| QVEItKK                                                              | T319                                        | <i>in vitro</i> PPK (a)                     |
| DN <sub>s</sub> GVtLEGPK                                             | S467, T470                                  | <i>in vivo</i> (a), <i>in vitro</i> PPK (a) |
| G <sub>s</sub> G <sub>s</sub> AN <sub>s</sub> VG <sub>ss</sub> ttRPK | S490, S492, S495, S498,<br>S499, T500, T501 | <i>in vivo</i> (a), <i>in vitro</i> PPK (a) |
| EIPG <sub>s</sub> IR                                                 | S578                                        | <i>in vitro</i> PPK (a)                     |

688 (a) this study, (b) Wirthmueller *et al.*, 2018. Phosphopeptides between the WWE- and PARP-like-  
689 domains are marked with *italic*. Lowercase s and t represent phosphorylated serine and threonine  
690 residues respectively. The full list of phosphopeptides identified in this study is present in  
691 Supplementary table 2.

692



693 **FIGURE LEGENDS**

694 **Figure 1. Nuclear localization of RCD1 is essential for its function.**

695 **A.** Schematic representation of RCD1 domain structure containing a bipartite NLS, WWE-, PARP-  
696 like- and RST-domains. Intrinsically disordered regions between the domains are marked as IDR1-4.

697 **B.** *rcd1*-specific curly leaf phenotype in RCD1*nls*-HA lines. *rcd1* phenotype can be complemented by  
698 re-introduction of wild type RCD1-HA into the mutant background, but not by RCD1 with mutated  
699 NLS. Picture shows 5-week-old plant rosettes of two independent lines (A and B) for each construct  
700 under standard growth conditions.

701 **C.** RCD1 requires its NLS to complement the *rcd1*-specific MV tolerance. PSII inhibition (Fv/Fm) by  
702 methyl viologen (MV) was measured in indicated lines using 1  $\mu$ M MV. For each experiment, leaf  
703 discs from three individual rosettes were used. The experiment was performed three times with similar  
704 results. Mean  $\pm$  SD are shown. \*\*\* – P-value < 0.001 with Bonferroni corrected *post hoc* test; n.s. –  
705 non-significant difference. Source data and statistics are presented in Supplementary table 1.

706 **D.** Disruption of NLS leads to higher RCD1 accumulation in plants. Abundance of RCD1-HA in  
707 indicated RCD1*nls*-HA and RCD1-HA lines was assessed by immunoblot analysis with HA-specific  
708 antibodies. A total protein amount of 100  $\mu$ g corresponds to 100%. Rubisco large subunit detected by  
709 amido black staining is shown as a control for protein loading.

710

711 **Figure 2. RCD1 localizes to NBs dependent on WWE- and PARP-like-domains and binds PAR.**

712 **A.** Deletion of the WWE- or PARP-like-domains, but not the RST-domain, prevents NB localization of  
713 RCD1. Confocal images were taken from stable Arabidopsis lines expressing full-length RCD1-Venus,  
714 RCD1 $\Delta$ WWE-Venus, RCD1 $\Delta$ PARP-Venus or RCD1 $\Delta$ RST-Venus.

715 **B.** NB formation by RCD1 is diminished by a PARP inhibitor 3MB. Plants expressing RCD1-Venus  
716 were pretreated overnight at 4°C without (control) or with 3MB, after which confocal images were  
717 taken.

718 **C.** RCD1 binds PAR *in vitro*. PAR binding activity of immobilized GST-tagged domains of RCD1 and  
719 full-length RCD1-His was assessed by dot-blot assay using PAR-specific antibody. GST tagged human  
720 WWE-domain (hWWE) and GST were used as positive and negative controls, respectively. GST  
721 antibody was used to assess protein loading.

722 **D.** WWE domain of RCD1 is required for interaction with PAR. SPR sensorgrams of interaction  
723 between immobilized RCD1-His or GST-RCD1 $\Delta$ WWE and PAR profiled at 625 nM. Increase in  
724 response units shows association of PAR with RCD1-His but not with GST-RCD1 $\Delta$ WWE.

725

726 **Figure 3. PPK localization to NBs is RCD1-dependent.**

727 **A.** RCD1 colocalizes with PPKs in NBs in tobacco. RCD1-Venus was co-expressed with RFP or RFP-  
728 tagged PPKs in epidermal cells of *N. benthamiana* and the subnuclear localization was analyzed by  
729 confocal microscopy.

730 **B.** PPK-RFPs alone do not form NB. PPK-RFP fusion proteins were expressed as in (A) but without  
731 co-expression of RCD1-Venus.

732

733 **Figure 4. PPKs phosphorylate RCD1 at multiple sites.**

734 **A.** Representation of RCD1 phosphosites identified by *in vivo* and *in vitro* analyses. RCD1 domains are  
735 highlighted in blue and named on top of the sequence. Individual phosphosites are marked in red and  
736 numbered.

737 **B, C.** Phosphosites in the region between WWE- and PARP-like-domains are targets for PPKs.  
738 Recombinant GST-PPK2 and GST-PPK4 were used together with recombinant GST-RCD1 protein in  
739 *in vitro* kinase assays. GST-PPK2 and 4 (asterisks) showed activity towards GST-RCD1 (red  
740 arrowhead). There was no activity detected against the mutated GST-RCD1<sup>S/T</sup>IDR2<sup>A</sup> protein. Upper  
741 panel shows autoradiograph, lower panel shows the Coomassie-stained SDS-PAGE.

742 **D.** Phosphorylation of IDR2 of RCD1 by PPKs affects its stability and function. *In vivo* abundance of  
743 RCD1<sup>S/T</sup>IDR2<sup>A</sup>-HA and of wild-type RCD1-HA variants was assessed in independent transgenic lines  
744 by immunoblot analysis with HA-specific antibody. The RCD1<sup>S/T</sup>IDR2<sup>A</sup>-HA variant did not fully  
745 complement *rcd1*-specific accumulation of alternative oxidases (AOX1/2), as revealed by immunoblot  
746 with  $\alpha$ AOX1/2 antibodies. Rubisco large subunit detected by amido black staining is shown as a  
747 control for equal protein loading.

748 **E.** RCD1<sup>S/T</sup>IDR2<sup>A</sup>-HA variant does not fully complement *rcd1*-specific tolerance to MV. PSII  
749 inhibition (Fv/Fm) by MV was measured in indicated lines using 1  $\mu$ M MV. For each experiment, leaf  
750 discs from at least four individual rosettes were used. The experiment was performed three times with  
751 similar results. Mean  $\pm$  SD are shown. \*\*\* – P-value < 0.001 with Bonferroni corrected *post hoc* test at

752 the selected time points between *rcd1*: RCD1<sup>S/T</sup>IDR2<sup>A</sup>-HA (line B) and *rcd1*: RCD1-HA lines. Full  
753 source data and statistics are presented in Supplementary table 1.

754

755 **Figure 5. Knockout of PPKs stabilizes native RCD1.**

756 **A.** RCD1 accumulation in *ppk* triple mutants is higher than in Col-0. RCD1 level was assessed in total  
757 protein extracts from 3-week-old plants by immunoblot analysis with RCD1-specific antibody. Rubisco  
758 large subunit detected by amido black staining is shown as a control for equal protein loading.

759 **B.** *ppk* triple mutants are more sensitive to MV than Col-0. PSII inhibition (Fv/Fm) by MV was  
760 measured in indicated lines using 0.1  $\mu$ M MV. For each experiment, leaf discs from four individual  
761 rosettes were used. The experiment was performed three times with similar results. Mean  $\pm$  SD are  
762 shown. \* – P-value < 0.05 with Bonferroni corrected *post hoc* test at the selected time point between  
763 *ppk124* and Col-0. Source data and statistics are presented in Supplementary table 1.

764

765

766 **Figure 6. A model describing the regulation of nuclear RCD1 function in dependence of PAR**

767 **binding and phosphorylation by PPKs.** (1) RCD1 enters the nucleus by means of its bipartite N-  
768 terminal NLS sequence. In the nucleus, RCD1 interacts with PPKs (2), with diverse transcription  
769 factors (3) and with PAR (4). PAR recruits RCD1 to NBs of yet uncharacterized nature. Unknown  
770 PARylated proteins involved in RCD1 recruitment are labeled with a question mark. RCD1 is  
771 phosphorylated by PPKs at multiple sites in IDR2 (5), which targets RCD1 for degradation (6). RCD1  
772 structure was predicted in RaptorX (<http://raptorx.uchicago.edu/>). Structural model of the WWE-  
773 domain is based on mouse RNF146 (2RSF), structures of RCD1 PARP-like- (5NGO, Wirthmueller *et*  
774 *al*, 2018) and RST- (5N9Q, Bugge *et al*, 2018) domains have been reported. Terminal and inter-domain  
775 regions of RCD1 are not drawn to scale.

776

777 **Supplementary information.**

778 **Supplementary figure 1. Characterization of stable transgenic lines expressing RCD1 domain**  
779 **deletion constructs fused to triple Venus tag in *rcd1* background.**

780 **A.** Schematic representation of domain deletion constructs in complementation lines.

781 **B.** Expression of RCD1 domain deletion constructs in *rcd1* background complements *rcd1*-specific  
782 curly leaf phenotype. Pictures show 5-week-old plant rosettes of two independent lines (A and B) for  
783 each construct under standard growth conditions.

784 **C.** MV sensitivity is restored in lines expressing RCD1-Venus, RCD1 $\Delta$ WWE-Venus and  
785 RCD1 $\Delta$ PARP-Venus constructs, but only partially in lines expressing RCD1 $\Delta$ RST-Venus. PSII  
786 inhibition (Fv/Fm) by MV was measured in indicated lines using 1  $\mu$ M MV. For each experiment, leaf  
787 discs from three individual rosettes were used. The experiment was performed three times with similar  
788 results. Mean  $\pm$  SD are shown. \*\*\* – P-value < 0.001 with Bonferroni corrected *post hoc* test. Source  
789 data and statistics are presented in Supplementary table 1.

790 **D.** Domain deletion does not lead to decreased expression of RCD1. RCD1 level in indicated lines was  
791 assessed by immunoblot analysis of total protein extracts with GFP-specific antibody. A total amount  
792 of 100  $\mu$ g protein was loaded.

793

794 **Supplementary figure 2. RCD1 binds PAR but not ADP-ribose or cyclic ADP-ribose.**

795 **A.** The purity of recombinant proteins used in *in vitro* analyses of PAR binding. Proteins were purified,  
796 resolved by SDS-PAGE and stained with Coomassie.

797 **B, C.** RCD1-His neither binds mono-ADP-ribose (ADPR), nor cyclic ADP-ribose (cADPR). SPR  
798 sensorgrams do not show any response in case of ADPR or cADPR profiled at 1 mM concentrations  
799 over immobilized RCD1-His.

800 **D.** PAR titration curve obtained by SPR analysis of PAR binding by RCD1-His. The curve was plotted  
801 using non-linear regression with the assumption of one-to-one binding.

802

803 **Supplementary figure 3. RCD1 is phosphorylated *in-vivo*.** RCD1-HA migrates in SDS-PAGE as a  
804 double band visualized by immunoblot analysis of protein extracts with HA-specific antibody. Upper  
805 band corresponding to phosphorylated form of RCD1-HA was diminished by treatment of plant  
806 extracts with alkaline phosphatase (CIP). Rubisco large subunit detected by amido black staining is  
807 shown as a control for equal protein loading.

808

809 **Supplementary figure 4. RCD1-GFP interacts with PPK-HA in tobacco.** RCD1-GFP was  
810 transiently co-expressed with HA-tagged versions of PPK1, 2, 3 or 4 in *N. benthamiana*. YFP served as  
811 negative control. At 72 hours post infiltration, RCD1-GFP and YFP were immunoprecipitated with  
812 GFP-specific antibody and co-precipitating PPK-HA proteins were detected by  $\alpha$ -HA immunoblot.  
813 Immunoprecipitation of RCD1-GFP and YFP was confirmed by an  $\alpha$ -GFP immunoblot. 'Input' samples  
814 were taken before immunoprecipitation and included on the immunoblots to test for equal expression  
815 and loading.

816

817 **Supplementary figure 5. Recombinant PPK2 and PPK4 are active in *in vitro* kinase assays.**  
818 Recombinant GST-PPK1-4 were used together with generic substrates casein and myelin basic protein  
819 (MBP) in an *in vitro* kinase assay. Upper panel shows autoradiograph, lower panel shows the  
820 Coomassie-stained SDS-PAGE.

821

822 **Supplementary figure 6. *In vivo* phosphorylation pattern of RCD1<sup>S/T</sup>IDR2<sup>A</sup>-HA is different from**  
823 **that of the wild type RCD1-HA.** Upper band corresponding to phosphorylated form of RCD1 is less  
824 abundant in RCD1<sup>S/T</sup>IDR2<sup>A</sup>-HA line as visualized by immunoblot analysis of protein extracts with HA-  
825 specific antibody. Lines A and B were chosen due to approximately equal expression of RCD1 in these  
826 lines (Figure 4D). 100% corresponds to 100  $\mu$ g of total protein. Rubisco large subunit detected by  
827 amido black staining is shown as a control for equal protein loading.

828

829 **Supplementary figure 7. ASK $\alpha$ , ASK $\gamma$ , and ASK $\epsilon$  phosphorylate RCD1 *in vitro*.**

830 **A.** Specificity of ASK $\alpha$ , ASK $\gamma$  and ASK $\epsilon$  towards RCD1. Recombinant ASK-GSTs were used together  
831 with recombinant GST-RCD1 protein in an *in vitro* kinase assay.

832 **B.** Thr204 is the target for ASKs. ASK $\alpha,\gamma,\epsilon$ -GST were used with recombinant GST-RCD1 or GST-  
833 RCD1T204A in an *in vitro* kinase assay. LOF indicates loss-of-function constructs of ASKs.

834 Upper panels shows autoradiographs, lower panels shows the Coomassie-stained SDS-PAGE.

835

836 **Supplementary table 1.** Source data and statistical analyses.

837

838 **Supplementary table 2.** Identified RCD1 phosphopeptides.

839

840 **Supplementary table 3.** Primers used in the study.

841

842



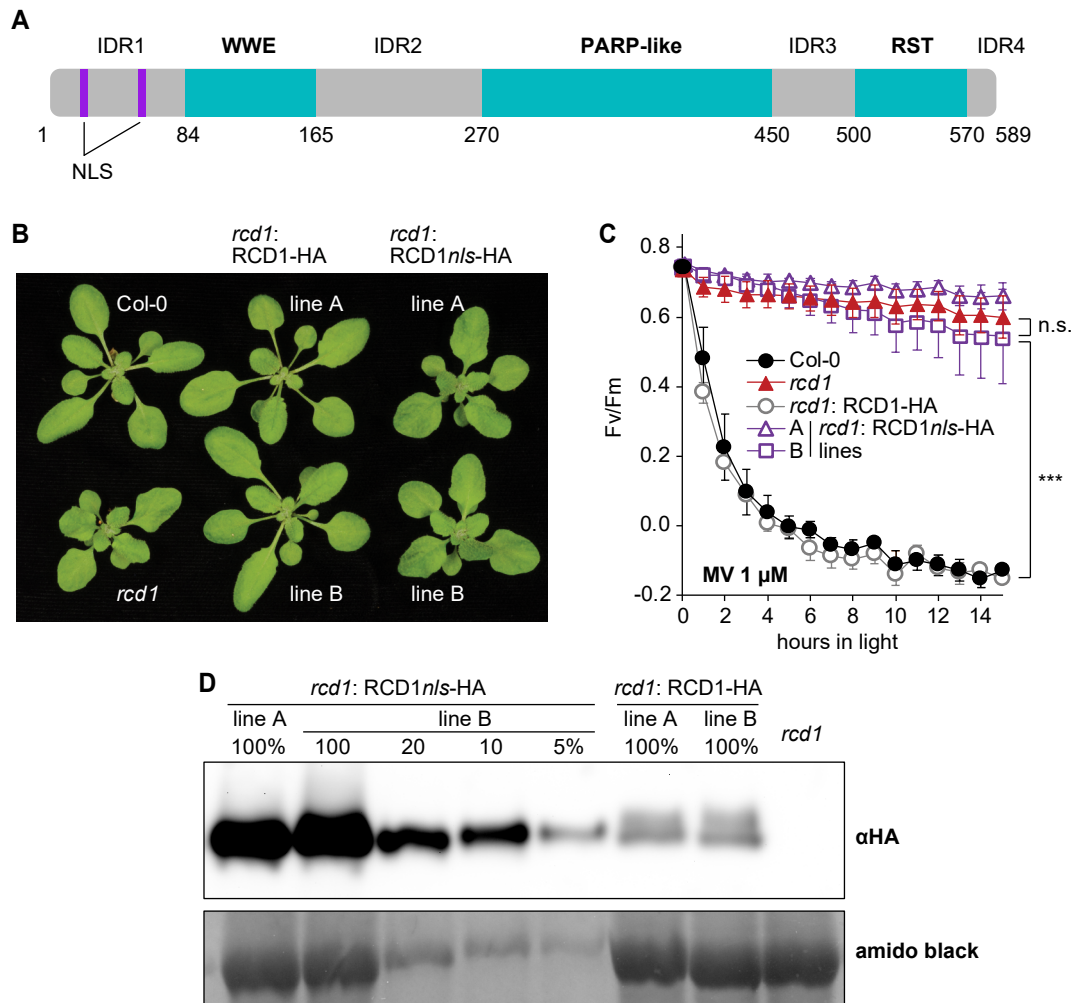

### Figure 1. Nuclear localization of RCD1 is essential for its function.

**A.** Schematic representation of RCD1 domain structure containing a bipartite NLS, WWE-, PARP-like- and RST-domains. Intrinsically disordered regions between the domains are marked as IDR1-4.

**B.** *rcd1*-specific curly leaf phenotype in RCD1nls-HA lines. *rcd1* phenotype can be complemented by re-introduction of wild type RCD1-HA into the mutant background, but not by RCD1 with mutated NLS. Picture shows 5-week-old plant rosettes of two independent lines (A and B) for each construct under standard growth conditions.

**C.** RCD1 requires its NLS to complement the *rcd1*-specific MV tolerance. PSII inhibition (Fv/Fm) by methyl viologen (MV) was measured in indicated lines using 1  $\mu$ M MV. For each experiment, leaf discs from three individual rosettes were used. The experiment was performed three times with similar results. Mean  $\pm$  SD are shown. \*\*\* – P-value < 0.001 with Bonferroni corrected *post hoc* test; n.s. – non-significant difference. Source data and statistics are presented in Supplementary table 1.

**D.** Disruption of NLS leads to higher RCD1 accumulation in plants. Abundance of RCD1-HA in indicated RCD1nls-HA and RCD1-HA lines was assessed by immunoblot analysis with HA-specific antibodies. A total protein amount of 100  $\mu$ g corresponds to 100%. Rubisco large subunit detected by amido black staining is shown as a control for protein loading.

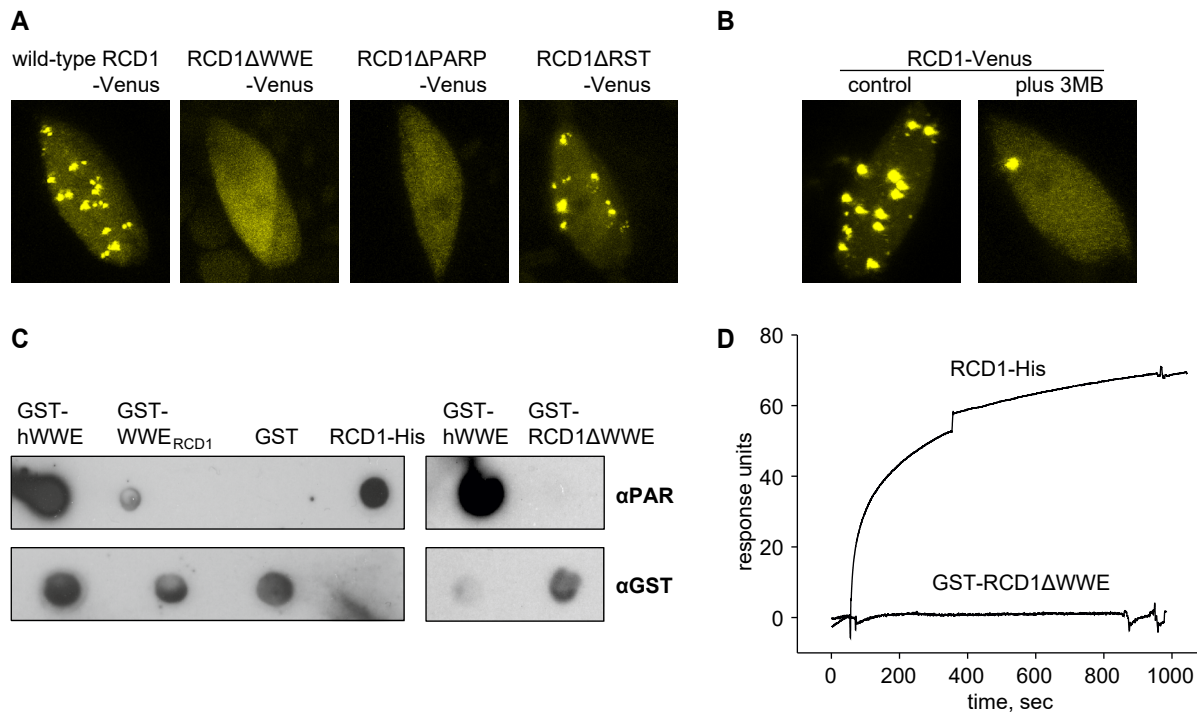

**Figure 2. RCD1 localizes to NBs dependent on WWE- and PARP-like-domains and binds PAR.**

**A.** Deletion of the WWE- or PARP-like-domains, but not the RST-domain, prevents NB localization of RCD1. Confocal images were taken from stable Arabidopsis lines expressing full-length RCD1-Venus, RCD1ΔWWE-Venus, RCD1ΔPARP-Venus or RCD1ΔRST-Venus.

**B.** NB formation by RCD1 is diminished by a PARP inhibitor 3MB. Plants expressing RCD1-Venus were pretreated overnight at 4°C without (control) or with 3MB, after which confocal images were taken.

**C.** RCD1 binds PAR *in vitro*. PAR binding activity of immobilized GST-tagged domains of RCD1 and full-length RCD1-His was assessed by dot-blot assay using PAR-specific antibody. GST tagged human WWE-domain (hWWE) and GST were used as positive and negative controls, respectively. GST antibody was used to assess protein loading.

**D.** WWE domain of RCD1 is required for interaction with PAR. SPR sensorgrams of interaction between immobilized RCD1-His or GST-RCD1ΔWWE and PAR profiled at 625 nM. Increase in response units shows association of PAR with RCD1-His but not with GST-RCD1ΔWWE.

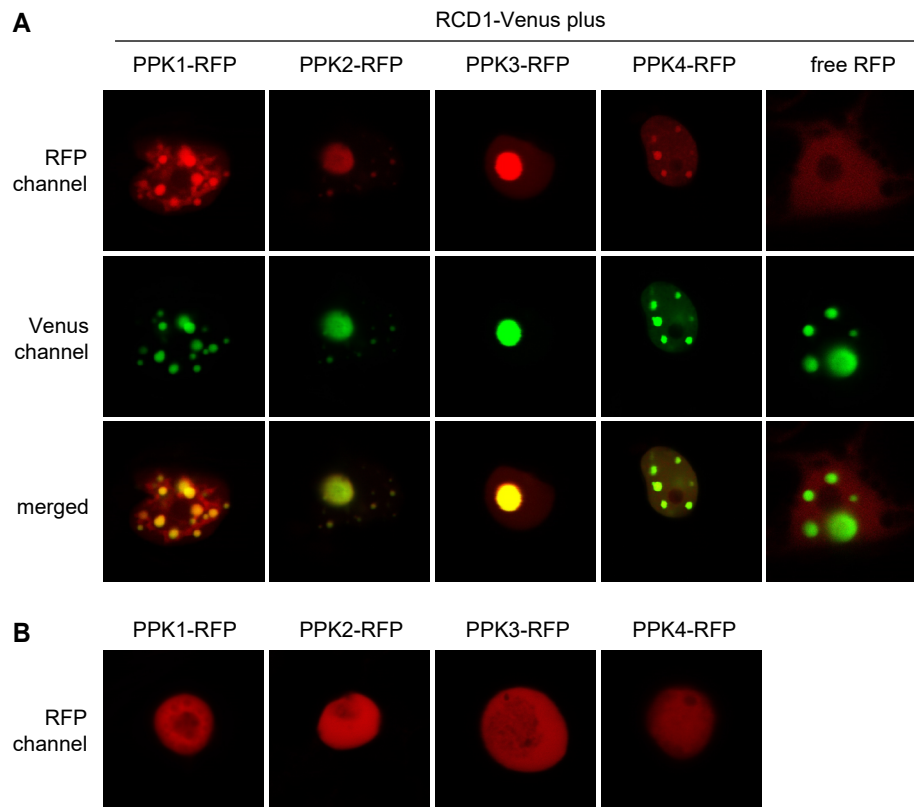

**Figure 3. PPK localization to NBs is RCD1-dependent.**

**A.** RCD1 colocalizes with PPKs in NBs in tobacco. RCD1-Venus was co-expressed with RFP or RFP-tagged PPKs in epidermal cells of *N. benthamiana* and the subnuclear localization was analyzed by confocal microscopy.

**B.** PPK-RFPs alone do not form NB. PPK-RFP fusion proteins were expressed as in (A) but without co-expression of RCD1-Venus.

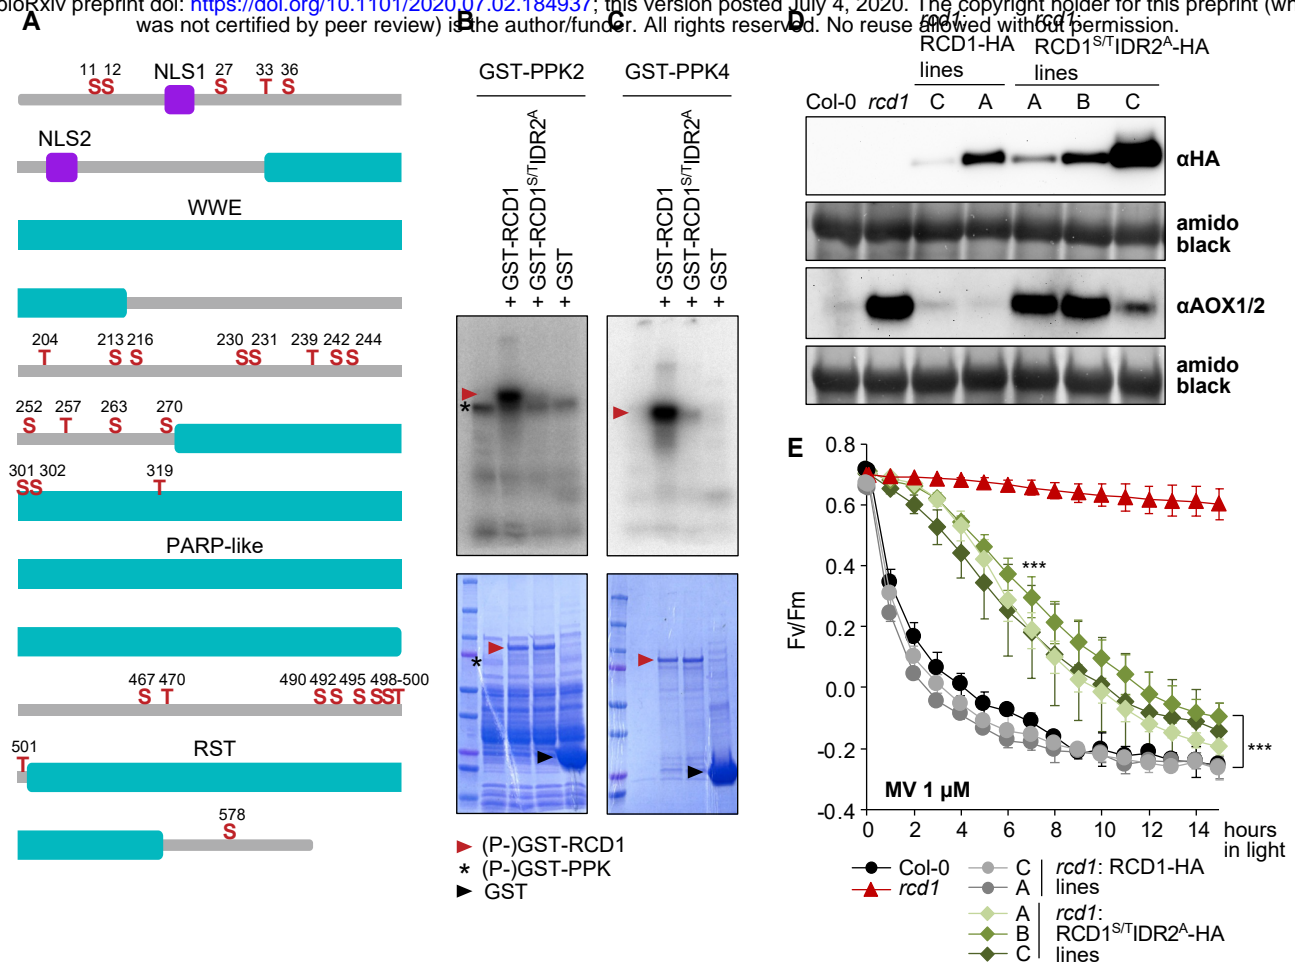

**Figure 4. PPKs phosphorylate RCD1 at multiple sites.**

**A.** Representation of RCD1 phosphosites identified by *in vivo* and *in vitro* analyses. RCD1 domains are highlighted in blue and named on top of the sequence. Individual phosphosites are marked in red and numbered.

**B, C.** Phosphosites in the region between WWE- and PARP-like-domains are targets for PPKs. Recombinant GST-PPK2 and GST-PPK4 were used together with recombinant GST-RCD1 protein in *in vitro* kinase assays. GST-PPK2 and 4 (asterisks) showed activity towards GST-RCD1 (red arrowhead). There was no activity detected against the mutated GST-RCD1<sup>S/T</sup>IDR2<sup>A</sup> protein. Upper panel shows autoradiograph, lower panel shows the Coomassie-stained SDS-PAGE.

**D.** Phosphorylation of IDR2 of RCD1 by PPKs affects its stability and function. *In vivo* abundance of RCD1<sup>S/T</sup>IDR2<sup>A</sup>-HA and of wild-type RCD1-HA variants was assessed in independent transgenic lines by immunoblot analysis with HA-specific antibody. The RCD1<sup>S/T</sup>IDR2<sup>A</sup>-HA variant did not fully complement *rcd1*-specific accumulation of alternative oxidases (AOX1/2), as revealed by immunoblot with  $\alpha$ AOX1/2 antibodies. Rubisco large subunit detected by amido black staining is shown as a control for equal protein loading.

**E.** RCD1<sup>S/T</sup>IDR2<sup>A</sup>-HA variant does not fully complement *rcd1*-specific tolerance to MV. PSII inhibition (Fv/Fm) by MV was measured in indicated lines using 1  $\mu$ M MV. For each experiment, leaf discs from at least four individual rosettes were used. The experiment was performed three times with similar results. Mean  $\pm$  SD are shown. \*\*\* – P-value < 0.001 with Bonferroni corrected *post hoc* test at the selected time points between *rcd1*: RCD1<sup>S/T</sup>IDR2<sup>A</sup>-HA (line B) and *rcd1*: RCD1-HA lines. Full source data and statistics are presented in Supplementary table 1.

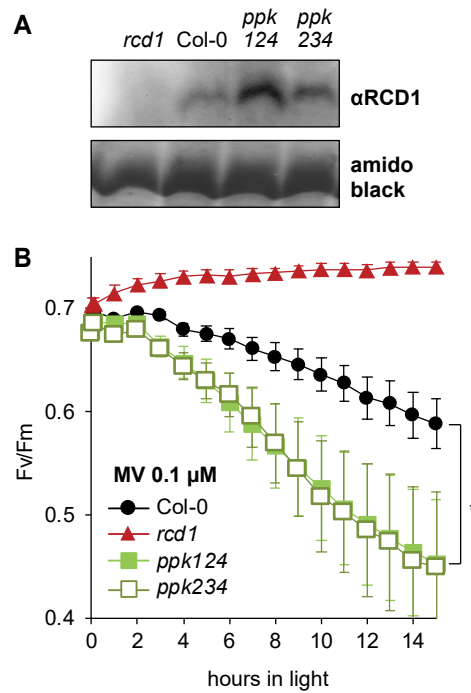

**Figure 5. Knockout of PPKs stabilizes native RCD1.**

**A.** RCD1 accumulation in *ppk* triple mutants is higher than in Col-0. RCD1 level was assessed in total protein extracts from 3-week-old plants by immunoblot analysis with RCD1-specific antibody. Rubisco large subunit detected by amido black staining is shown as a control for equal protein loading.

**B.** *ppk* triple mutants are more sensitive to MV than Col-0. PSII inhibition ( $F_v/F_m$ ) by MV was measured in indicated lines using 0.1  $\mu$ M MV. For each experiment, leaf discs from four individual rosettes were used. The experiment was performed three times with similar results. Mean  $\pm$  SD are shown. \* – P-value < 0.05 with Bonferroni corrected *post hoc* test at the selected time point between *ppk124* and Col-0. Source data and statistics are presented in Supplementary table 1.

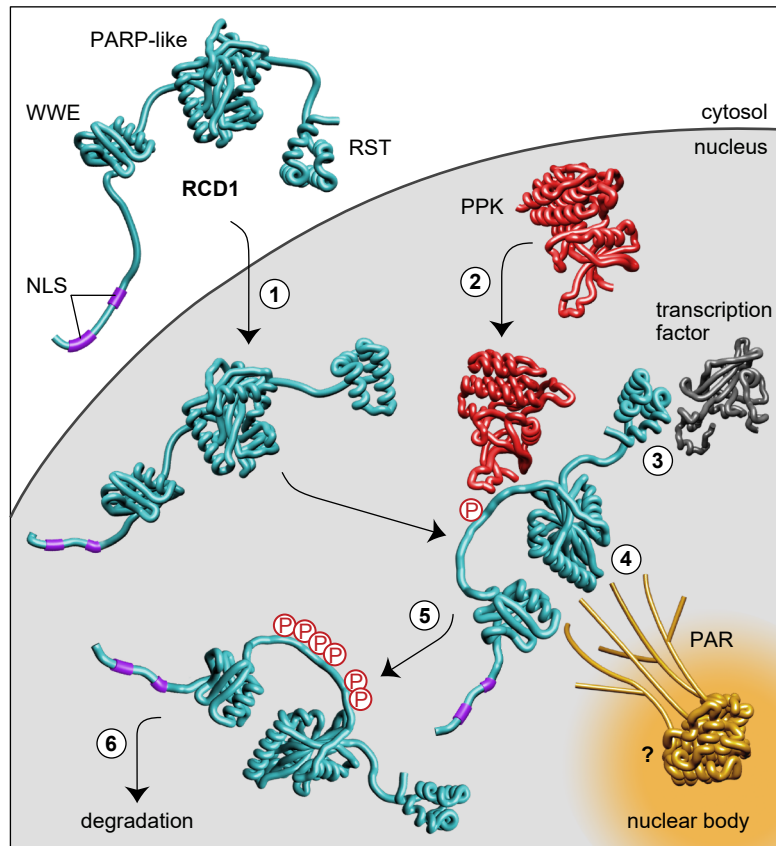

**Figure 6. A model describing the regulation of nuclear RCD1 function in dependence of PAR binding and phosphorylation by PPKs.**

(1) RCD1 enters the nucleus by means of its bipartite N-terminal NLS sequence. In the nucleus, RCD1 interacts with PPKs (2), with diverse transcription factors (3) and with PAR (4). PAR recruits RCD1 to NBs of yet uncharacterized nature. Unknown PARylated proteins involved in RCD1 recruitment are labeled with a question mark. RCD1 is phosphorylated by PPKs at multiple sites in IDR2 (5), which targets RCD1 for degradation (6). RCD1 structure was predicted in RaptorX (<http://raptorx.uchicago.edu/>). Structural model of the WWE-domain is based on mouse RNF146 (2RSF), structures of RCD1 PARP-like- (5NGO, Wirthmueller *et al*, 2018) and RST- (5N9Q, Bugge *et al*, 2018) domains have been reported. Terminal and inter-domain regions of RCD1 are not drawn to scale.



## Parsed Citations

**Adams-Phillips L, Briggs AG, Bent AF. 2010. Disruption of poly(ADP-ribosyl)ation mechanisms alters responses of Arabidopsis to biotic stress. *Plant Physiology* 152:267–280**

Pubmed: [Author and Title](#)

Google Scholar: [Author Only Title Only Author and Title](#)

**Ahel I, Ahel D, Matsusaka T, Clark AJ, Pines J, Boulton SJ, West SC. 2008. Poly(ADP-ribose)-binding zinc finger motifs in DNA repair/checkpoint proteins. *Nature* 451:81–85.**

Pubmed: [Author and Title](#)

Google Scholar: [Author Only Title Only Author and Title](#)

**Ahlfors R, Lång S, Overmyer K, Jaspers P, Brosché M, Tauriainen A, Kollist H, Tuominen H, Belles-Boix E, Piippo M et al. 2004. Arabidopsis RADICAL-INDUCED CELL DEATH1 belongs to the WWE protein-protein interaction domain protein family and modulates abscisic acid, ethylene, and methyl jasmonate responses. *Plant Cell* 16:1925-1937.**

Pubmed: [Author and Title](#)

Google Scholar: [Author Only Title Only Author and Title](#)

**Aravind L. 2001. The WWE domain: a common interaction module in protein ubiquitination and ADP ribosylation. *Trends in Biochemical Sciences* 26:273-275.**

Pubmed: [Author and Title](#)

Google Scholar: [Author Only Title Only Author and Title](#)

**Babiychuk E, Cottrill PB, Storozhenko S, Fuangthong M, Chen Y, O'Farrell MK, Van Montagu M, Inzé D, Kushnir S. 1998. Higher plants possess two structurally different poly(ADP-ribose) polymerases. *The Plant Journal* 15:635-645.**

Pubmed: [Author and Title](#)

Google Scholar: [Author Only Title Only Author and Title](#)

**Bah A, Forman-Kay JD. 2016. Modulation of intrinsically disordered protein function by post-translational modifications. *Journal of Biological Chemistry* 291:6696-6705.**

Pubmed: [Author and Title](#)

Google Scholar: [Author Only Title Only Author and Title](#)

**Briggs AG, Bent AF. 2011. Poly(ADP-ribosyl)ation in plants. *Trends in Plant Science* 16:372–380.**

Pubmed: [Author and Title](#)

Google Scholar: [Author Only Title Only Author and Title](#)

**Brosché M, Blomster T, Salojärvi J, Cui F, Sipari N, Leppälä J, Lamminmäki A, Tomai G, Narayanasamy S, Reddy RA et al. 2014. Transcriptomics and functional genomics of ROS-induced cell death regulation by RADICAL-INDUCED CELL DEATH1. *PLoS Genetics* 10:e1004112.**

Pubmed: [Author and Title](#)

Google Scholar: [Author Only Title Only Author and Title](#)

**Bugge K, Staby L, Kemplen KR, O'Shea C, Bendtsen SK, Jensen MK, Olsen JG, Skriver K, Kragelund BB. 2018. Structure of Radical-Induced Cell Death1 hub domain reveals a common  $\alpha$ -scaffold for disorder in transcriptional networks. *Structure* 26:734-746.**

Pubmed: [Author and Title](#)

Google Scholar: [Author Only Title Only Author and Title](#)

**Chen C, Masi R, Lintermann R, Wirthmueller L. 2018. Nuclear import of Arabidopsis poly(ADP-ribose) polymerase 2 is mediated by importin- $\alpha$  and a nuclear localization sequence located between the predicted SAP domains. *Frontiers in Plant Science* 9:1581.**

Pubmed: [Author and Title](#)

Google Scholar: [Author Only Title Only Author and Title](#)

**Chen HH, Qu L, Xu ZH, Zhu JK, Xue HW. 2018. EL1-like casein kinases suppress ABA signaling and responses by phosphorylating and destabilizing the ABA receptors PYR/PYLs in Arabidopsis. *Molecular Plant* 11:706-719.**

Pubmed: [Author and Title](#)

Google Scholar: [Author Only Title Only Author and Title](#)

**Christensen LF, Staby L, Bugge K, O'Shea C, Kragelund BB, Skriver K. 2019. Evolutionary conservation of the intrinsic disorder-based Radical-Induced Cell Death1 hub interactome. *Scientific Reports* 9:18927.**

Pubmed: [Author and Title](#)

Google Scholar: [Author Only Title Only Author and Title](#)

**Christians MJ, Gingerich DJ, Hua Z, Lauer TD, Vierstra RD. 2012. The light-response BTB1 and BTB2 proteins assemble nuclear ubiquitin ligases that modify phytochrome B and D signaling in Arabidopsis. *Plant Physiology* 160:118-134.**

Pubmed: [Author and Title](#)

Google Scholar: [Author Only Title Only Author and Title](#)

**Cohen MS, Chang P. 2018. Insights into the biogenesis, function, and regulation of ADP-ribosylation. *Nature Chemical Biology* 14:236-243.**

Pubmed: [Author and Title](#)

Google Scholar: [Author Only Title Only Author and Title](#)

**DaRosa PA, Wang Z, Jiang X, Pruneda JN, Cong F, Klevit RE, Xu W. 2015. Allosteric activation of the RNF146 ubiquitin ligase by a**

**poly(ADP-ribosyl)ation signal.** *Nature* 517:223-226.

Pubmed: [Author and Title](#)

Google Scholar: [Author Only Title Only Author and Title](#)

**Favero DS. 2020. Mechanisms regulating PIF transcription factor activity at the protein level.**

**Physiologia Plantarum.** doi: 10.1111/pp1.13075.

Pubmed: [Author and Title](#)

Google Scholar: [Author Only Title Only Author and Title](#)

**Feng B, Liu C, de Oliveira MV, Intorne AC, Li B, Babilonia K, de Souza Filho GA, Shan L, He P. 2015. Protein poly(ADP-ribosyl)ation regulates Arabidopsis immune gene expression and defense responses.** *PLoS Genetics* 11:e1004936

Pubmed: [Author and Title](#)

Google Scholar: [Author Only Title Only Author and Title](#)

**Feng B, Ma S, Chen S, Zhu N, Zhang S, Yu B, Yu Y, Le B, Chen X, Dinesh-Kumar SP et al. 2016. PARylation of the Forkhead-associated domain protein DAWDLE regulates plant immunity.** *EMBO Reports* 17:1799-1813.

Pubmed: [Author and Title](#)

Google Scholar: [Author Only Title Only Author and Title](#)

**Fujibe T, Saji H, Arakawa K, Yabe N, Takeuchi Y, Yamamoto KT. 2004. A methyl viologen-resistant mutant of Arabidopsis, which is allelic to ozone-sensitive rcd1, is tolerant to supplemental ultraviolet-B irradiation.** *Plant Physiology* 134:275-285.

Pubmed: [Author and Title](#)

Google Scholar: [Author Only Title Only Author and Title](#)

**Gupte R, Liu Z, Kraus WL. 2017. PARPs and ADP-ribosylation: recent advances linking molecular functions to biological outcomes.** *Genes & Development* 31:101-126.

Pubmed: [Author and Title](#)

Google Scholar: [Author Only Title Only Author and Title](#)

**Hiltscher H, Rudnik R, Shaikhali J, Heiber I, Mellenthin M, Meirelles Duarte I, Schuster G, Kahmann U, Baier M. 2014. The radical induced cell death protein 1 (RCD1) supports transcriptional activation of genes for chloroplast antioxidant enzymes.** *Frontiers in Plant Science* 5:475.

Pubmed: [Author and Title](#)

Google Scholar: [Author Only Title Only Author and Title](#)

**Huang H, Alvarez S, Bindbeutel R, Shen Z, Naldrett MJ, Evans BS, Briggs SP, Hicks LM, Kay SA, Nusinow DA. 2016. Identification of Evening complex associated proteins in Arabidopsis by affinity purification and mass spectrometry.** *Molecular and Cellular Proteomics* 15:201-217.

Pubmed: [Author and Title](#)

Google Scholar: [Author Only Title Only Author and Title](#)

**Iakoucheva LM, Radivojac P, Brown CJ, O'Connor TR, Sikes JG, Obradovic Z, Dunker AK. 2004. The importance of intrinsic disorder for protein phosphorylation.** *Nucleic Acids Research* 32:1037-1049.

Pubmed: [Author and Title](#)

Google Scholar: [Author Only Title Only Author and Title](#)

**Jaspers P, Blomster T, Brosché M, Salojärvi J, Ahlfors R, Vainonen JP, Reddy RA, Immink R, Angenent G, Turck F et al. 2009. Unequally redundant RCD1 and SRO1 mediate stress and developmental responses and interact with transcription factors.** *The Plant Journal* 60:268-279.

Pubmed: [Author and Title](#)

Google Scholar: [Author Only Title Only Author and Title](#)

**Jaspers P, Overmyer K, Wrzaczek M, Vainonen JP, Blomster T, Salojärvi J, Reddy RA, Kangasjärvi J. 2010. The RST and PARP-like domain containing SRO protein family: analysis of protein structure, function and conservation in land plants.** *BMC Genomics* 11:170.

Pubmed: [Author and Title](#)

Google Scholar: [Author Only Title Only Author and Title](#)

**Jespersen N, Barbar E. 2020. Emerging Features of Linear Motif-Binding Hub Proteins.** *Trends in Biochemical Sciences* 45:375-384.

Pubmed: [Author and Title](#)

Google Scholar: [Author Only Title Only Author and Title](#)

**Jungmichel S, Rosenthal F, Altmeyer M, Lukas J, Hottiger MO, Nielsen ML. 2013. Proteome-wide identification of poly(ADP-Ribosyl)ation targets in different genotoxic stress responses.** *Molecular Cell* 52:272-285.

Pubmed: [Author and Title](#)

Google Scholar: [Author Only Title Only Author and Title](#)

**Karimi M, Inzé D, Depicker A. 2002. GATEWAY vectors for Agrobacterium-mediated plant transformation.** *Trends in Plant Science* 7:193-195.

Pubmed: [Author and Title](#)

Google Scholar: [Author Only Title Only Author and Title](#)

**Kim DS, Challa S, Jones A, Kraus WL. 2020. PARPs and ADP-ribosylation in RNA biology: from RNA expression and processing to protein translation and proteostasis.** *Genes & Development* 34:302-320.

Pubmed: [Author and Title](#)

Google Scholar: [Author Only](#) [Title Only](#) [Author and Title](#)

**Kragelund BB, Jensen MK, Skriver K. 2012. Order by disorder in plant signaling. Trends in Plant Science 17:625-32.**

Pubmed: [Author and Title](#)

Google Scholar: [Author Only](#) [Title Only](#) [Author and Title](#)

**Lamb RS, Citarelli M, Teotia S. 2012. Functions of the poly(ADP-ribose) polymerase superfamily in plants. Cellular and Molecular Life Sciences 69:175–189.**

Pubmed: [Author and Title](#)

Google Scholar: [Author Only](#) [Title Only](#) [Author and Title](#)

**Leung AKL. 2017. PARPs. Current Biology 27:R1256-R1258.**

Pubmed: [Author and Title](#)

Google Scholar: [Author Only](#) [Title Only](#) [Author and Title](#)

**Liu Q, Wang Q, Deng W, Wang X, Piao M, Cai D, Li Y, Barshop WD, Yu X, Zhou T et al. 2017. Molecular basis for blue light-dependent phosphorylation of Arabidopsis cryptochrome 2. Nature Communications 8:15234.**

Pubmed: [Author and Title](#)

Google Scholar: [Author Only](#) [Title Only](#) [Author and Title](#)

**Love AJ, Yu C, Petukhova NV, Kalinina NO, Chen J, Taliansky ME. 2017. Cajal bodies and their role in plant stress and disease responses. RNA Biology 14:779-790.**

Pubmed: [Author and Title](#)

Google Scholar: [Author Only](#) [Title Only](#) [Author and Title](#)

**Mao YS, Zhang B, Spector DL. 2011. Biogenesis and function of nuclear bodies. Trends in Genetics 27:295-306.**

Pubmed: [Author and Title](#)

Google Scholar: [Author Only](#) [Title Only](#) [Author and Title](#)

**Martello R, Leutert M, Jungmichel S, Bilan V, Larsen SC, Young C, Hottiger MO, Nielsen ML. 2016. Proteome-wide identification of the endogenous ADP-ribosylome of mammalian cells and tissue. Nature Communications 7:12917.**

Pubmed: [Author and Title](#)

Google Scholar: [Author Only](#) [Title Only](#) [Author and Title](#)

**Martin G, Leivar P, Ludevid D, Tepperman JM, Quail PH, Monte E. 2016. Phytochrome and Retrograde Signalling Pathways Converge to Antagonistically Regulate a Light-Induced Transcriptional Network. Nature Communications 7:11431.**

Pubmed: [Author and Title](#)

Google Scholar: [Author Only](#) [Title Only](#) [Author and Title](#)

**McLellan H, Boevink PC, Armstrong MR, Pritchard L, Gomez S, Morales J, Whisson SC, Beynon JL, Birch PR. 2013. An RxLR effector from Phytophthora infestans prevents re-localisation of two plant NAC transcription factors from the endoplasmic reticulum to the nucleus. PLoS Pathogens 9:e1003670.**

Pubmed: [Author and Title](#)

Google Scholar: [Author Only](#) [Title Only](#) [Author and Title](#)

**Mergner J, Frejno M, List M, Papacek M, Chen X, Chaudhary A, Samaras P, Richter S, Shikata H, Messerer M et al. 2020. Mass-spectrometry-based draft of the Arabidopsis proteome. Nature 579:409-414.**

Pubmed: [Author and Title](#)

Google Scholar: [Author Only](#) [Title Only](#) [Author and Title](#)

**Nakagawa T, Suzuki T, Murata S, Nakamura S, Hino T, Maeo K, Tabata R, Kawai T, Tanaka K, Niwa Y et al. 2007. Improved Gateway binary vectors: high-performance vectors for creation of fusion constructs in transgenic analysis of plants. Bioscience Biotechnology, and Biochemistry 71: 2095-2100.**

Pubmed: [Author and Title](#)

Google Scholar: [Author Only](#) [Title Only](#) [Author and Title](#)

**Ni W, Xu SL, Gonzalez-Grandio E, Chalkley RJ, Huhmer AFR, Burlingame AL, Wang ZY, Quail PH. 2017. PPKs mediate direct signal transfer from phytochrome photoreceptors to transcription factor PIF3. Nature Communications 8:15236.**

Pubmed: [Author and Title](#)

Google Scholar: [Author Only](#) [Title Only](#) [Author and Title](#)

**O'Shea C, Staby L, Bendtsen SK, Tidemand FG, Redsted A, Willemoës M, Kragelund BB, Skriver K. 2017. Structures and short linear motif of disordered transcription factor regions provide clues to the interactome of the cellular hub protein Radical-induced Cell Death1. Journal of Biological Chemistry 292:512-527.**

Pubmed: [Author and Title](#)

Google Scholar: [Author Only](#) [Title Only](#) [Author and Title](#)

**Overmyer K, Tuominen H, Kettunen R, Betz C, Langebartels C, Sandermann H Jr, Kangasjärvi J. 2000. Ozone-sensitive Arabidopsis rcd1 mutant reveals opposite roles for ethylene and jasmonate signaling pathways in regulating superoxide-dependent cell death. Plant Cell 12:1849-1862.**

Pubmed: [Author and Title](#)

Google Scholar: [Author Only](#) [Title Only](#) [Author and Title](#)

**Palazzo L, Leidecker O, Prokhorova E, Dauben H, Matic I, Ahel I. 2018. Serine is the major residue for ADP-ribosylation upon DNA damage. Elife 7: e34334.**

Pubmed: [Author and Title](#)

Google Scholar: [Author Only Title Only Author and Title](#)

**Qin F, Sakuma Y, Tran LS, Maruyama K, Kidokoro S, Fujita Y, Fujita M, Umezawa T, Sawano Y, Miyazono K et al. 2008. Arabidopsis DREB2A-interacting proteins function as RING E3 ligases and negatively regulate plant drought stress-responsive gene expression. *Plant Cell* 20, 1693–1707.**

Pubmed: [Author and Title](#)

Google Scholar: [Author Only Title Only Author and Title](#)

**Reddy AS, Day IS, Göhring J, Barta A. 2012. Localization and dynamics of nuclear speckles in plants. *Plant Physiology* 158:67-77.**

Pubmed: [Author and Title](#)

Google Scholar: [Author Only Title Only Author and Title](#)

**Saidi Y, Hearn TJ, Coates JC. 2012. Function and evolution of 'green' GSK3/Shaggy-like kinases. *Trends in Plant Science* 17:39-46.**

Pubmed: [Author and Title](#)

Google Scholar: [Author Only Title Only Author and Title](#)

**Shapiguzov A, Vainonen JP, Hunter K, Tossavainen H, Tiwari A, Järvi S, Hellman M, Aarabi F, Alosekh S, Wybouw B et al. 2019. Arabidopsis RCD1 coordinates chloroplast and mitochondrial functions through interaction with ANAC transcription factors. *Elife* 8: e43284.**

Pubmed: [Author and Title](#)

Google Scholar: [Author Only Title Only Author and Title](#)

**Siligato R, Wang X, Yadav SR, Lehesranta S, Ma G, Ursache R, Sevilem I, Zhang J, Gorte M, Prasad K et al. 2016. MultiSite Gateway-compatible cell type-specific gene-inducible system for plants. *Plant Physiology* 170: 627-641.**

Pubmed: [Author and Title](#)

Google Scholar: [Author Only Title Only Author and Title](#)

**Simon L, Voisin M, Tatout C, Probst AV. 2015. Structure and function of centromeric and pericentromeric heterochromatin in *Arabidopsis thaliana*. *Frontiers in Plant Science* 6:1049.**

Pubmed: [Author and Title](#)

Google Scholar: [Author Only Title Only Author and Title](#)

**Song J, Keppler BD, Wise RR, Bent AF. 2015. PARP2 is the predominant poly(ADP-Ribose) polymerase in *Arabidopsis* DNA damage and immune responses. *PLoS Genetics* 11:e1005200.**

Pubmed: [Author and Title](#)

Google Scholar: [Author Only Title Only Author and Title](#)

**Stampfl H, Fritz M, Dal Santo S, Jonak C. 2016. The GSK3/Shaggy-Like Kinase ASK $\alpha$  Contributes to Pattern-Triggered Immunity. *Plant Physiology* 171:1366-1377.**

Pubmed: [Author and Title](#)

Google Scholar: [Author Only Title Only Author and Title](#)

**Su Y, Wang S, Zhang F, Zheng H, Liu Y, Huang T, Ding Y. 2017. Phosphorylation of histone H2A at Serine 95: a plant-specific mark involved in flowering time regulation and H2AZ deposition. *Plant Cell* 29:2197-2213.**

Pubmed: [Author and Title](#)

Google Scholar: [Author Only Title Only Author and Title](#)

**Teloni F, Altmeyer M. 2016. Readers of poly(ADP-ribose): designed to be fit for purpose. *Nucleic Acids Research* 44:993-1006.**

Pubmed: [Author and Title](#)

Google Scholar: [Author Only Title Only Author and Title](#)

**Teotia S, Lamb RS. 2009. The paralogous genes RADICAL-INDUCED CELL DEATH1 and SIMILAR TO RCD ONE1 have partially redundant functions during *Arabidopsis* development. *Plant Physiology* 151:180-198.**

Pubmed: [Author and Title](#)

Google Scholar: [Author Only Title Only Author and Title](#)

**Vainonen JP, Jaspers P, Wrzaczek M, Lamminmäki A, Reddy RA, Vaahtera L, Brosché M, Kangasjärvi J. 2012. RCD1-DREB2A interaction in leaf senescence and stress responses in *Arabidopsis thaliana*. *Biochemical Journal* 442:573-581.**

Pubmed: [Author and Title](#)

Google Scholar: [Author Only Title Only Author and Title](#)

**Vainonen JP, Shapiguzov A, Vaattovaara A, Kangasjärvi J. 2016. Plant PARPs, PARGs and PARP-like proteins. *Current Protein and Peptide Science* 17:713-723.**

Pubmed: [Author and Title](#)

Google Scholar: [Author Only Title Only Author and Title](#)

**Van Buskirk EK, Decker PV, Chen M. 2012. Photobodies in light signaling. *Plant Physiology* 158:52-60.**

Pubmed: [Author and Title](#)

Google Scholar: [Author Only Title Only Author and Title](#)

**Wang Z, Michaud GA, Cheng Z, Zhang Y, Hinds TR, Fan E, Cong F, Xu W. 2012. Recognition of the iso-ADP-ribose moiety in poly(ADP-ribose) by WWE domains suggests a general mechanism for poly(ADP-ribosyl)ation-dependent ubiquitination. *Genes & Development* 26:235-240.**

Pubmed: [Author and Title](#)

Google Scholar: [Author Only](#) [Title Only](#) [Author and Title](#)

**Wang Z, Casas-Mollano JA, Xu J, Riethoven JJ, Zhang C, Cerutti H. 2015. Osmotic stress induces phosphorylation of histone H3 at threonine 3 in pericentromeric regions of *Arabidopsis thaliana*. Proceedings of the National Academy of Sciences, USA 112:8487-8492.**

Pubmed: [Author and Title](#)

Google Scholar: [Author Only](#) [Title Only](#) [Author and Title](#)

**Wirthmueller L, Asai S, Rallapalli G, Sklenar J, Fabro G, Kim DS, Lintermann R, Jaspers P, Wrzaczek M, Kangasjärvi J et al. 2018. *Arabidopsis* downy mildew effector HaRxL106 suppresses plant immunity by binding to RADICAL-INDUCED CELL DEATH1. New Phytologist 220:232-248.**

Pubmed: [Author and Title](#)

Google Scholar: [Author Only](#) [Title Only](#) [Author and Title](#)

**Zhang Y, Liu S, Mickanin C, Feng Y, Charlat O, Michaud GA, Schirle M, Shi X, Hild M, Bauer A et al. 2011. RNF146 is a poly(ADP-ribose)-directed E3 ligase that regulates axin degradation and Wnt signalling. Nature Cell Biology 13:623-629.**

Pubmed: [Author and Title](#)

Google Scholar: [Author Only](#) [Title Only](#) [Author and Title](#)

**Zhang YJ, Wang JQ, Ding M, Yu YH. 2013. Site-specific characterization of the Asp- and Glu-ADP-ribosylated proteome. Nature Methods 10:981-984.**

Pubmed: [Author and Title](#)

Google Scholar: [Author Only](#) [Title Only](#) [Author and Title](#)

**Zheng H, Zhang F, Wang S, Su Y, Ji X, Jiang P, Chen R, Hou S, Ding Y. 2018. MLK1 and MLK2 coordinate RGA and CCA1 to regulate hypocotyl elongation in *Arabidopsis thaliana*. Plant Cell 30:67-82.**

Pubmed: [Author and Title](#)

Google Scholar: [Author Only](#) [Title Only](#) [Author and Title](#)
