1 **Arabidopsis poly(ADP-ribose)-binding protein RCD1 interacts with Photoregulatory Protein**  
2 **Kinases in nuclear bodies.**

3 Julia P. Vainonen<sup>1,2\*</sup>, Alexey Shapiguzov<sup>1,3\*</sup>, Julia Krasensky-Wrzaczek<sup>1\*</sup>, Richard Gossens<sup>1\*</sup>,  
4 Raffaella De Masi<sup>4,5</sup>, Iulia Danciu<sup>6,7</sup>, Tuomas Puukko<sup>1</sup>, Natalia Battchikova<sup>8</sup>, Claudia Jonak<sup>6,7</sup>, Lennart  
5 Wirthmueller<sup>4,5</sup>, Michael Wrzaczek<sup>1,9</sup>, Jaakko Kangasjärvi<sup>1</sup>

6 Author affiliations

7 1. Organismal and Evolutionary Biology Research Programme, Faculty of Biological and Environmental  
8 Sciences, and Viikki Plant Science Center, University of Helsinki, FI-00014 Helsinki, Finland.

9 2. Current address: Turku Bioscience Centre, University of Turku, FI-20520 Turku, Finland.

10 3. Permanent address: Institute of Plant Physiology, Russian Academy of Sciences, Botanicheskaya  
11 Street, 35, 127276 Moscow, Russia.

12 4. Department Biochemistry of Plant Interactions, Leibniz Institute of Plant Biochemistry, Weinberg 3,  
13 06120 Halle (Saale), Germany.

14 5. Dahlem Centre of Plant Sciences, Institute of Biology, Freie Universität Berlin, Königin-Luise-Str.  
15 12-16, 14195 Berlin, Germany.

16 6. Gregor Mendel Institute, Austrian Academy of Sciences, Vienna BioCenter, Dr. Bohr-Gasse 3, 1030  
17 Vienna, Austria.

18 7. Bioresources Unit, Center for Health & Bioresources, AIT Austrian Institute of Technology GmbH,  
19 3430, Tulln, Austria.

20 8. Department of Biochemistry, Molecular Plant Biology, University of Turku, FI-20014 Turku, Finland.

21 9. Institute of Plant Molecular Biology, Biology Centre, Czech Academy of Sciences,  
22 Branišovská 1160/31, 370 05 České Budějovice, Czech Republic.

23

24 \* These authors contributed equally to the manuscript.

25 Corresponding author: Jaakko Kangasjärvi, [jaakko.kangasjarvi@helsinki.fi](mailto:jaakko.kangasjarvi@helsinki.fi)

26

27 **Abstract**

28

29 Continuous reprogramming of gene expression in response to environmental signals is required for plant  
30 survival in changing environment. One mechanism responsible for this is signaling through hub proteins  
31 that integrate external stimuli and transcriptional responses. RADICAL-INDUCED CELL DEATH1  
32 (RCD1) functions as a nuclear hub protein, that interacts with a variety of transcription factors through  
33 its C-terminal RST domain and acts as a co-regulator of numerous stress responses in plants. Here, a  
34 previously unknown function for RCD1 as a novel plant poly(ADP-ribose) (PAR) reader protein is  
35 described. RCD1 localizes to specific locations inside the nucleus, in a PAR-dependent manner; its N-  
36 terminal WWE domain binds PAR and together with the PARP-like domain determines its localization  
37 to nuclear bodies (NBs), which is prevented by inhibition of PAR synthesis. RCD1 also interacts with  
38 Photoregulatory Protein Kinases (PPKs) that co-localize with RCD1 in the NBs. The PPKs, that have  
39 been associated with circadian clock, abscisic acid, and light signaling pathways, phosphorylate RCD1  
40 at multiple sites in the intrinsically disordered region between the WWE and PARP-like domains. This  
41 affects its stability and functions in the nucleus and provides a mechanism where the turnover of a PAR-  
42 binding transcriptional co-regulator is controlled by nuclear protein kinases.

## 43 INTRODUCTION

44 Plants are constantly exposed to a variety of environmental cues that are relayed to the nucleus, which  
45 coordinates adaptation to challenges associated with those cues. The eukaryotic nucleus has many  
46 functions including DNA and RNA biogenesis and processing, transcriptional regulation, RNA splicing,  
47 protein modification and degradation. Many functions are organized within non-membranous  
48 compartments, so-called “nuclear bodies” (NBs; Mao *et al*, 2011). Several types of NBs have been  
49 identified, such as the nucleolus, Cajal bodies, Polycomb bodies, and photobodies. Specific NB-  
50 associated proteins have also been described, including members of the splicing machinery (Reddy *et al*,  
51 2012), chromatin-associated proteins (Simon *et al*, 2015), ubiquitin ligases (Christians *et al*, 2012),  
52 photoreceptors (Van Buskirk *et al*, 2012), and protein kinases (Wang *et al*, 2015).

53 *Arabidopsis thaliana* RADICAL-INDUCED CELL DEATH1 (RCD1) is a nuclear-localized  
54 multidomain protein comprised of an N-terminal bipartite nuclear localization sequence (NLS), a WWE  
55 domain, a poly(ADP-ribose) polymerase-like (PARP-like) domain, and an RCD1-SRO-TAF4 (RST)  
56 domain (Ahlfors *et al*, 2004; Jaspers *et al*, 2009; Jaspers *et al*, 2010; **Figure 1A**). The domains of RCD1  
57 are flanked by intrinsically disordered regions (IDRs), which likely provide flexibility in assuming the  
58 final overall protein conformation. *Arabidopsis* RCD1 and its paralog, SRO1 (SIMILAR TO RCD ONE  
59 1), can form homo- and heterodimers (Wirthmueller *et al*, 2018). The presence of at least one of the  
60 paralogs is essential since the *rcd1 sro1* double mutant displays defects in embryo development and is  
61 not viable under standard growth conditions (Jaspers *et al*, 2009; Teotia & Lamb, 2011).

62 In plants, the RST-domain is unique to the RCD1-SRO protein family and TAF4 proteins (Jaspers *et al*,  
63 2010). It has been described as a domain that mediates interactions with many RCD1-associated proteins  
64 (O’Shea *et al*, 2017; Bugge *et al*, 2018; Shapiguzov *et al*, 2019). A structurally diverse set of transcription  
65 factors interacts with the RST domain, making RCD1 an important hub for transcriptional regulation  
66 (Jaspers *et al*, 2009; Vainonen *et al*, 2012; O’Shea *et al*, 2017; Christensen *et al*, 2019; Shapiguzov *et al*,  
67 2019; Jespersen & Barbar, 2020). Unlike the RST domain, the WWE and PARP-like domains of RCD1  
68 have hardly been characterized.

69 The WWE domain was originally defined computationally and proposed to be a protein-protein  
70 interaction domain in proteins related to ubiquitination and ADP-ribosylation (Aravind 2001). Later  
71 studies have shown that some, but not all animal WWE domains bind iso-ADP ribose, a structural unit  
72 of poly(ADP-ribose) – PAR (Wang *et al*, 2012; DaRosa *et al*, 2015). In *Arabidopsis thaliana*, the WWE

73 domain has only been identified in RCD1 and SRO1. While the PARP-like domain in these proteins does  
74 not exhibit detectable PARP activity (Jaspers *et al*, 2010; Wirthmueller *et al*, 2018), the presence of  
75 WWE and a PARP-like domains together suggests a function of RCD1 in PAR-related processes  
76 (Vainonen *et al*, 2016).

77 Poly-ADP-ribosylation (PARylation) of proteins is a reversible posttranslational modification, which has  
78 been intensively studied in animals during recent decades (Gupte *et al*, 2017; Cohen & Chang, 2018).  
79 PARPs catalyze PARylation by covalently attaching ADP-ribose moieties to glutamate, aspartate, lysine,  
80 arginine, serine, threonine and cysteine residues in a species- and tissue-specific manner (Jungmichel *et al*  
81 *et al*, 2013; Zhang *et al*, 2013; Martello *et al*, 2016; Leung 2017; Palazzo *et al*, 2018). PAR-glycohydrolase  
82 (PARG) can trim down PAR chains to the terminal protein-bound ADP-ribose thereby removing PAR  
83 from proteins. Additionally, several signaling components that recognize PARylated proteins, so-called  
84 “PAR readers”, have been identified in animal systems (Gupte *et al*, 2017; Kim *et al*, 2020), but have  
85 not been described in plants yet. On a functional level, in animal cells PARylation has been shown to  
86 regulate a variety of cellular processes including chromatin remodeling, transcription, and programmed  
87 cell death (Gupte *et al*, 2017; Kim *et al*, 2020). In plants, the role of PAR is only starting to emerge and  
88 the few studies available suggest an important role for PARylation in plant stress and developmental  
89 responses (Vainonen *et al*, 2016).

90 In addition to transcription factors, RCD1 has been shown to interact with Photoregulatory Protein  
91 Kinases (PPKs; also named MUT9-like kinases, MLKs, or Arabidopsis EL1-like kinases, AELs;  
92 Wirthmueller *et al*, 2018; Shapiguzov *et al*, 2019). In Arabidopsis, this recently discovered family of  
93 protein kinases is comprised of four members that localize to NBs (Wang *et al*, 2015). PPKs interact with  
94 different nuclear proteins, including histones, components of the circadian clock and light signaling, and  
95 the ABA receptor PYR/PYL/RCAR (Wang *et al*, 2015; Huang *et al*, 2016; Liu *et al*, 2017; Ni *et al*, 2017;  
96 Su *et al*, 2017; Chen *et al*, 2018; Zheng *et al*, 2018). PPK-dependent phosphorylation of the transcription  
97 regulators PIF3 and CRY2, and the ABA receptor PYR/PYL/RCAR has been shown to target these  
98 proteins for degradation (Liu *et al*, 2017; Ni *et al*, 2017; Chen *et al*, 2018). However, the mechanistic  
99 roles for phosphorylation of histone and circadian clock component by PPKs have not been described so  
100 far.

101 Here we show that Arabidopsis RCD1 localizes to NBs in a PAR-dependent manner. RCD1 binds PAR  
102 via the WWE domain and can be described as the first identified PAR reader in plants. Furthermore, we

103 demonstrate that RCD1 is phosphorylated by members of the PPK protein kinase family, which co-  
104 localize with RCD1 *in vivo* in NBs. Increased RCD1 protein levels together with altered tolerance to  
105 oxidative stress in *ppk* mutant plants suggest that phosphorylation by PPKs regulates RCD1 protein  
106 stability.

107

## 108 **RESULTS**

### 109 **Nuclear localization is essential for RCD1 function**

110 To address the role of subcellular localization for the function of RCD1, the basic amino acids of the  
111 NLS were substituted with aliphatic ones (K21L/R22I and R56I/R57I). These point mutations were  
112 introduced into a construct expressing RCD1 tagged with triple HA epitope at the protein C-terminus,  
113 under the native RCD1 promoter (Jaspers *et al*, 2009) and transformed into *rcd1* background (RCD1*nls*-  
114 HA lines hereafter). To verify that disruption of the NLS prevents nuclear localization of RCD1, we also  
115 generated stable Arabidopsis lines in *rcd1* background expressing wild type RCD1 or RCD1*nls* fused to  
116 a triple Venus tag under the control of the UBIQUITIN10 promoter (*rcd1*:RCD1-Venus and  
117 *rcd1*:RCD1*nls*-Venus lines). The subcellular localization of the tagged proteins was studied by confocal  
118 microscopy. In contrast to the wild type protein that was localized to the nucleus, RCD1*nls*-Venus was  
119 localized outside of nuclei (**Supplementary figure 1A**).

120 RCD1*nls*-HA lines were further studied for their ability to complement *rcd1* phenotypes. Among several  
121 stress- and development-related phenotypes (Overmyer *et al*, 2000; Ahlfors *et al*, 2004; Jaspers *et al*,  
122 2009; Teotia & Lamb, 2009; Hiltcher *et al*, 2014), the *rcd1* mutant displays curly leaves and tolerance  
123 to the herbicide methyl viologen (MV) (Ahlfors *et al*, 2004; Fujibe *et al*, 2004; Shapiguzov *et al*, 2019).  
124 At the molecular level, MV interferes with the electron transfer chain in chloroplasts and catalyzes  
125 production of reactive oxygen species (ROS). Introduction of RCD1-HA, but not RCD1*nls*-HA, into  
126 *rcd1* restored the wild type shape of the leaves (**Figure 1B**). Similarly, in *rcd1*:RCD1*nls*-HA plants the  
127 increased tolerance of *rcd1* to MV was not reverted to wild type-like sensitivity (**Figure 1C**). Analysis  
128 of protein levels in the transgenic lines revealed increased RCD1 accumulation in RCD1*nls*-HA lines  
129 compared to wild type RCD1-HA (**Figure 1D**). Thus, despite higher levels of RCD1 in RCD1*nls*-HA  
130 lines, *rcd1* phenotypes were not complemented. These results suggest that nuclear localization is required  
131 for the proper function of RCD1.

## 132 **WWE and PARP-like domains are required for RCD1 function**

133 The role of individual domains of RCD1 was addressed by generation of RCD1 domain deletion  
134 constructs tagged with triple HA epitope and expressed under the native RCD1 promoter  
135 (*rcd1*:RCD1 $\Delta$ WWE-HA, *rcd1*:RCD1 $\Delta$ PARP-like-HA, *rcd1*:RCD1 $\Delta$ RST-HA lines hereafter). The  
136 structure of the domain deletion constructs is shown in **Supplementary figure 1B**. These lines were  
137 tested for characteristic *rcd1* phenotypes, including plant habitus, flowering time and MV tolerance. At  
138 least two individual lines for each protein variant were used in all the experiments.

139 Expression of RCD1 lacking the individual domains in *rcd1* background did not fully complement the  
140 curly leaf phenotype and early flowering specific to the *rcd1* mutant (**Figure 2A, 2D**). The abundance of  
141 RCD1-HA in the domain deletion lines was verified by immunoblot analysis with HA-specific antibody  
142 (**Figure 2B**). These analyses confirmed that the lack of complementation was not due to the absence of  
143 protein in these lines. The domain deletion lines also exhibited high abundance of the mitochondrial  
144 alternative oxidase AOX1/2 proteins (**Figure 2B**), which is characteristic for the *rcd1* mutant  
145 (Shapiguzov et al, 2019). Analysis of the lines showed that the RCD1 domain deletions did not  
146 complement the *rcd1*-specific MV tolerance to the wild type sensitivity (**Figure 2C, Supplementary**  
147 **figure 2**); these results are in agreement with higher AOX1/2 expression in the domain deletion lines.  
148 Deletion of the RST domain resulted in MV tolerance phenotype most similar to *rcd1*, whereas  
149 *rcd1*:RCD1 $\Delta$ WWE-HA and *rcd1*:RCD1 $\Delta$ PARP-like-HA lines exhibited intermediate sensitivity to MV.  
150 Only wild type RCD1-HA fully complemented the *rcd1* early flowering phenotype. RCD1 $\Delta$ PARP-like-  
151 HA complemented the early flowering only partially, while RCD1 $\Delta$ WWE-HA did not complement this  
152 phenotype at all. Interestingly RCD1 $\Delta$ RST-HA intensified early flowering (**Figure 2D, Supplementary**  
153 **figure 2**).

154 Together, these results indicated that the WWE and the PARP-like domains of RCD1 are required for at  
155 least some of RCD1 functions in the nucleus together with the RST domain that mediates RCD1  
156 interaction with transcription factors.

## 157 **RCD1 localizes to NBs and binds PAR**

158 To study the nuclear localization of RCD1 in further detail, we used Arabidopsis lines expressing wild  
159 type RCD1-Venus fusion protein described above, as well as deletion constructs lacking the individual  
160 domains (WWE, PARP-like, and RST) under control of the UBIQUITIN10 promoter in *rcd1* background

161 **(Supplementary figure 1B)**. Microscopic analysis of RCD1-Venus lines showed that RCD1 localized  
162 exclusively to the nucleus. Within the nucleus, RCD1-Venus localized to the nucleoplasm and,  
163 intriguingly, to distinct NBs **(Figure 3A)**. Deletion of the WWE or the PARP-like domain, but not the  
164 RST domain, suppressed localization of RCD1 to these NBs under standard growth conditions **(Figure**  
165 **3A)**. Immunoblot analysis of the corresponding lines showed increased levels of RCD1-Venus in all  
166 deletion constructs compared to wild type RCD1-Venus **(Figure 3B)**. Thus, the apparent inability of  
167 RCD1 $\Delta$ WWE and RCD1 $\Delta$ PARP-like to form NBs was not due to low protein abundance.

168 The WWE domain has previously been described to bind PAR in mammalian cells (Zhang *et al*, 2011;  
169 Wang *et al*, 2012; DaRosa *et al*, 2015). Therefore, we tested whether a chemical inhibitor of PAR  
170 synthesis, 3-methoxybenzamide (3MB), would influence NB localization of RCD1-Venus. Indeed, in  
171 3MB-treated plants, RCD1-Venus localized almost exclusively to the nucleoplasm **(Figure 3C)**. This  
172 suggests that the presence of PARylated proteins in the nucleus is necessary for RCD1 to localize to NBs.

173 To examine whether RCD1 can bind PAR directly, we tested the interaction *in vitro*. Recombinant  
174 proteins were expressed in *E.coli*, purified **(Supplementary Figure 3A)** and dot-blotted on a  
175 nitrocellulose membrane. The membrane was then incubated with PAR polymer, washed, and  
176 subsequently probed with anti-PAR or anti-GST antibodies. As shown in **Figure 3D**, the WWE domain  
177 of RCD1 alone, as well as the full-length protein (fused to either GST or His-tags, respectively),  
178 interacted with PAR. To verify that PAR-binding was mediated by the WWE domain, we tested the  
179 PAR-binding properties of a truncated version of RCD1 lacking the WWE domain (GST-RCD1 $\Delta$ WWE).  
180 This variant was not able to bind PAR as shown in **Figure 3D**. In contrast, deletion of the PARP-like  
181 domain did not prevent *in vitro* PAR binding by RCD1 in the dot-blot assay **(Supplementary figure**  
182 **3B)**.

183 For quantitative characterization of the RCD1-PAR interaction, we applied surface plasmon resonance  
184 (SPR), a method that allows label-free detection of biomolecular interactions. SPR demonstrated that  
185 full-length RCD1 interacted with PAR and that the interaction was abolished by deletion of the WWE  
186 domain (GST-RCD1 $\Delta$ WWE; **Figure 3E**). The binding curve was similar with the WWE domains  
187 described in other studies (Zhang *et al*, 2011; Wang *et al*, 2012). Absence of dissociation in the running  
188 buffer **(Figure 3E)** confirmed strong complex formation between PAR and RCD1. Estimation of the  
189 affinity of the interaction by binding experiments with increasing concentrations of the PAR ligand  
190 resulted in a dissociation constant of 28.2 nM **(Supplementary Figure 3C)** indicating high-affinity

191 interaction. Furthermore, in the SPR analyses RCD1 did not interact with compounds related to PAR,  
192 such as monomeric ADP-ribose, or cyclic ADP-ribose, a known second messenger (**Supplementary**  
193 **Figure 3D and E**). Thus, our experiments showed that RCD1 specifically binds PAR with high affinity  
194 and this interaction requires the WWE domain.

#### 195 **RCD1 co-localizes with PPKs in NBs**

196 Immunoblot analyses showed that nuclear-localized RCD1-HA migrated in SDS-PAGE as a double band  
197 (**Figure 1D**), indicative of post-translational modification of the protein. To test whether the double band  
198 was caused by phosphorylation of RCD1, protein extracts from plants expressing wild type RCD1-HA  
199 were treated with calf intestinal alkaline phosphatase. The phosphatase treatment eliminated the double  
200 band of RCD1-HA (**Supplementary Figure 4**), suggesting that RCD1 is an *in vivo* phosphoprotein.  
201 RCD1-HA migrated as a single band in the transgenic lines expressing RCD1*nls*-HA (**Figure 1D**),  
202 suggesting that nuclear localization was necessary for phosphorylation of RCD1.

203 Our previous proteomic analyses of RCD1 interactors (Wirthmueller *et al*, 2018; Shapiguzov *et al*, 2019),  
204 showed that RCD1 interacted *in vivo* with a newly described family of protein kinases, the  
205 Photoregulatory Protein Kinases (PPKs). This interaction was confirmed by targeted co-  
206 immunoprecipitation experiments in tobacco using RCD1-GFP and PPK-HA constructs, in which  
207 RCD1-GFP co-immunoprecipitated with PPK1, 3 and 4 (**Supplementary Figure 5**). The apparent lack  
208 of interaction between RCD1 and PPK2 in this assay could indicate either isoform-specific differences  
209 in the strength of association, or technical limitations as PPK2 protein was hardly detectable in total  
210 protein extracts. Collectively, these data confirmed complex formation between Arabidopsis RCD1 and  
211 PPKs also in a heterologous *in vivo* plant expression system.

212 It has previously been shown that PPKs localize to NBs in Arabidopsis (Wang *et al*, 2015). To test  
213 whether PPKs co-localized with RCD1 in the same NBs, we co-expressed RCD1-Venus and PPK-RFP  
214 transiently in tobacco. Results shown in **Figure 4A** demonstrated co-localization of RCD1 with all four  
215 RFP-tagged PPKs in NBs, but not with RFP alone. Expression of PPK-RFP constructs alone in tobacco  
216 showed uniform distribution of the proteins inside the nucleus (**Figure 4B**), which suggests that  
217 localization of Arabidopsis PPKs to NBs in tobacco was dependent on the interaction with Arabidopsis  
218 RCD1-Venus. Transient expression of PPK1-RFP, PPK3-RFP and PPK4-RFP in RCD1-Venus seedlings  
219 confirmed co-localization of RCD1 and PPKs in Arabidopsis (**Figure 4C**).



220 These results are in line with complex formation between RCD1 and PPKs and confirmed their co-  
221 localization in NBs.

## 222 **RCD1 is phosphorylated by PPKs**

223 Interaction of RCD1 with PPKs prompted us to study phosphorylation of RCD1 in more detail. Mass  
224 spectrometric determination of *in vivo* phosphosites in RCD1-HA immunoprecipitated from Arabidopsis  
225 revealed several phospho-serine and phospho-threonine-containing peptides (**Table 1, Figure 5A**). To  
226 verify whether PPKs could phosphorylate RCD1 directly, we tested PPK kinase activity towards RCD1  
227 *in vitro* using recombinant GST-tagged proteins. GST-PPK2 and GST-PPK4 could be purified from *E.*  
228 *coli* with detectable kinase activity against the generic substrates myelin basic protein (MBP) and casein  
229 (**Supplementary figure 6**). Phosphorylation experiments using radioactively labelled  $\gamma$ [<sup>32</sup>P]-ATP  
230 (**Figure 5B, C**) showed that both GST-PPKs phosphorylated GST-RCD1 *in vitro*. Phosphorylated GST-  
231 RCD1 was analyzed by mass spectrometry to identify PPK-dependent *in vitro* phosphorylation sites.  
232 This revealed that several of the PPK-dependent *in vitro* phosphopeptides of RCD1 were also identified  
233 in the *in vivo* pull-down experiments. All *in vivo* and *in vitro* phosphopeptides from this and an earlier  
234 study (Wirthmueller *et al*, 2018) are listed in **Table 1**. A schematic representation of all identified  
235 phospho-sites in RCD1 is shown in **Figure 5A**. Notably, RCD1 is phosphorylated almost exclusively in  
236 its IDRs.

237 Combined data of *in vivo* and *in vitro* analyses of RCD1 phosphorylation revealed that most phosphosites  
238 concentrated in the IDR2, the region between the WWE and PARP-like domains. We mutated the 15  
239 identified phosphosites in this region to non-phosphorylatable alanine residues by gene synthesis yielding  
240 an RCD1 variant that is further referred to as RCD1<sup>S/T</sup>IDR2<sup>A</sup>. This protein variant was subjected to *in*  
241 *vitro* kinase assays with GST-PPK2 and GST-PPK4. Mutation of the 15 phosphosites in IDR2 abolished  
242 phosphorylation of RCD1 by PPKs *in vitro* (**Figure 5B, C**). Thus, PPKs showed specificity towards  
243 RCD1 phosphosites in IDR2. This is consistent with the previous result that the sequence up to the PARP-  
244 like domain was sufficient to co-immunoprecipitate endogenous PPKs from plant cell extracts  
245 (Wirthmueller *et al*, 2018). To address the role of IDR2 phosphorylation *in vivo*, we generated transgenic  
246 lines expressing the RCD1<sup>S/T</sup>IDR2<sup>A</sup>-HA construct in *rcd1* background under the native RCD1 promoter.  
247 In accordance with the *in-vitro* data, mutation of the IDR2 phosphosites to alanine resulted in  
248 disappearance of the phosphorylated protein form in *rcd1*: RCD1<sup>S/T</sup>IDR2<sup>A</sup>-HA line (**Supplementary**  
249 **figure 7A**). Despite the higher abundance, the RCD1<sup>S/T</sup>IDR2<sup>A</sup>-HA variant did not complement

250 accumulation of AOX1/2 specific for *rcd1*, as revealed by immunoblot with  $\alpha$ AOX1/2 antibodies  
251 (**Figure 5D**). Furthermore, expression of RCD1<sup>S/T</sup>IDR2<sup>A</sup>-HA could not fully complement the *rcd1* MV  
252 tolerance (**Figure 5E**), nor did it complement the habitus (**Supplementary figure 7B**) and the early  
253 flowering of *rcd1* (**Supplementary figure 2B**). This suggests that mutation of the 15 residues in IDR2  
254 affected the nuclear functions of RCD1. Since the RST domain, which interacts with transcription factors,  
255 is retained in this mutant variant, phosphorylation by PPKs seems to be required for RCD1 to act as a  
256 negative regulator of transcription factors as proposed earlier (Jaspers et al, 2009; Vainonen et al, 2012;  
257 Shapiguzov et al, 2019).

258 To test the effect of RCD1 phosphorylation by PPKs on PAR binding ability *in vitro*, we performed dot-  
259 blot assay using purified non-phosphorylatable GST-RCD1<sup>S/T</sup>IDR2<sup>A</sup> and phospho-mimicking GST-  
260 RCD1<sup>S/T</sup>IDR2<sup>D/E</sup>. Neither of the variants showed significantly different efficiency in binding purified  
261 PAR *in-vitro* as compared to wild type GST-RCD1 (**Supplementary figure 7C**). Thus, phosphorylation  
262 of IDR2 did not affect the interaction between RCD1 and purified PAR.

263 In addition to the PPK-related phosphosites between the WWE and the PARP-like domains, RCD1  
264 harbors other *in vivo* phosphorylation sites, presumably targeted by other protein kinases linking RCD1  
265 to different upstream signaling pathways (**Figure 5A**). One of the identified sites, Thr204, is a predicted  
266 target for proline-directed protein kinases. We tested Arabidopsis GSK3/Shaggy-like protein kinases  
267 (ASKs), a group of stress-related proline-directed protein kinases (Saidi *et al*, 2012), for their ability to  
268 phosphorylate RCD1. *In vitro* kinase assays with several ASKs (**Supplementary figure 8A**) showed that  
269 ASK $\alpha$ , ASK $\gamma$ , and to a lesser extent, ASK $\epsilon$  phosphorylated RCD1. Since Thr204 was the only  
270 phosphorylated residue flanked by a proline, we mutated Thr204 to alanine (RCD1-T204A). This  
271 mutation abolished or strongly reduced phosphorylation of RCD1 by the ASKs (**Supplementary figure**  
272 **8B**) indicating that ASK $\alpha$ , ASK $\gamma$ , and ASK $\epsilon$  target Thr204. The kinases targeting phospho-sites towards  
273 the N- and C-termini of RCD1 remain to be identified.

274 Our results with *rcd1*:RCD1<sup>S/T</sup>IDR2<sup>A</sup>-HA lines (**Figure 5D** and **Supplementary figure 7**) suggest that  
275 phosphorylation by PPKs affects the stability of RCD1. PPK-mediated phosphorylation of proteins has  
276 been shown to impact protein stability by targeting proteins for degradation (Ni *et al*, 2016; Liu *et al*,  
277 2017; Chen *et al*, 2018). To address this question further, we analyzed RCD1 levels in triple *ppk* mutant  
278 plants. Immunoblot analysis of *ppk124* and *ppk234* with an RCD1-specific antibody revealed increased  
279 RCD1 levels compared to wild type plants (**Figure 6A**). Furthermore, in accordance with earlier results

280 (Shapiguzov *et al*, 2019), higher accumulation of native RCD1, such as in triple *ppk* mutants, coincided  
281 with lower resistance of plants to MV compared to wild type (**Figure 6B**). These data suggest that PPK-  
282 dependent phosphorylation of RCD1 plays an important regulatory role for RCD1 protein stability and  
283 function.

284

285

286 **DISCUSSION**

287 Plants continuously reprogram their gene expression in response to environmental stimuli. In nature,  
288 numerous simultaneous signals and cues have to be processed and integrated to achieve an adequate and  
289 balanced response. This can be accomplished e.g. with hub proteins which integrate signals from  
290 different sources and adjust the activity of transcription factors to ensure appropriate responses (Bugge  
291 *et al*, 2018; Vandereyken *et al*, 2018; Jespersen & Barbar, 2020). Hub proteins frequently interact with  
292 many different protein partners, including transcription factors, to provide a flexible system, which can  
293 simultaneously adjust several cellular functions according to changes in the surrounding environment.  
294 The RCD1 protein has been suggested in several studies to be such a hub protein (Jaspers *et al*, 2009;  
295 Hiltcher *et al*, 2014, Bugge *et al*, 2018; Shapiguzov *et al*, 2019; Jespersen & Barbar, 2020). Accordingly,  
296 disruption of the *RCD1* gene results in highly pleiotropic phenotypes and altered expression of a large  
297 number of genes (Ahlfors *et al*, 2004; Jaspers *et al*, 2009; Teotia & Lamb 2009, Brosché *et al*, 2014).  
298 Interaction of RCD1 with such a great variety of proteins is facilitated by its IDRs, which enable RCD1  
299 to adjust its final conformation upon binding to its interaction partners (Kragelund *et al*, 2012; Bugge *et*  
300 *al*, 2018). In addition, other factors, such as recognition of signaling molecules or regulation of protein  
301 stability can contribute to the versatility of hub proteins, including RCD1.

302 **RCD1 is a PAR reader**

303 Protein PARylation is a transient post-translational modification that has been associated with adjustment  
304 of development and response to stress conditions in plants (Briggs & Bent, 2011; Lamb *et al*, 2012; Feng  
305 *et al*, 2015). While the inventories of PARPs and PARGs have been defined in Arabidopsis (Vainonen  
306 *et al*, 2016; Rissel & Peiter, 2019), only a very limited number of PARylated proteins have so far been  
307 identified in plants; PARPs (Babychuk *et al*, 1998; Feng *et al*, 2015), histones (Whitby *et al*, 1979;  
308 Willmitzer 1979) and the nuclear protein DAWDLE involved in micro-RNA processing (Feng *et al*,  
309 2016). Nuclear Cajal bodies have also been linked to active PARPs in plants (Love *et al*, 2017).

310 The so-called “PAR readers”, proteins that non-covalently bind PAR (Teloni & Altmeyer, 2016; Gupte  
311 *et al*, 2017) have thus far remained unidentified in plants. Several animal WWE domain containing  
312 proteins have been described as PAR readers. However, it is worth to note that merely the presence of  
313 WWE domain in a protein sequence *per se* does not guarantee PAR binding, for instance the WWE  
314 domains of human PARP14 and DDHD2 are unable to bind PAR (Wang *et al*, 2012; He *et al*, 2012). It

315 has been suggested that in animal cells the PAR polymer provides an interaction platform for PAR reader  
316 proteins to modulate cellular responses, including chromatin remodeling, protein degradation and cell  
317 death (Kim *et al*, 2020). In mammalian cells, several of these PAR-related processes co-localize with  
318 PAR-binding proteins in NBs (Ahel *et al*, 2008). The localization of RCD1 in NBs reported in this study  
319 was suppressed by 3MB (**Figure 3C**), a nicotinamide analog that inhibits PARP activity, suggesting that  
320 localization of RCD1 to NBs was PAR-dependent. However, the localization of RCD1 to NBs was also  
321 compromised if either the WWE or the PARP-like domain was removed, while *in vitro* experiments  
322 showed that only the WWE domain of RCD1 directly bound PAR. This suggests that the role of the  
323 PARP-like domain of RCD1 in its PAR-dependent NB localization may be related to other processes or  
324 interactions. Thus, the detailed molecular mechanisms whereby PAR participates in the formation of  
325 NBs and the recruitment of RCD1 therein remain to be elucidated.

326 While the WWE-PARP module is required for the PAR-dependent localization of RCD1 to NBs, the C-  
327 terminal RST domain of RCD1 binds many different transcription factors (Jaspers *et al*, 2009, 2010).  
328 Based on our data presented here and in previous publications, RCD1 might act as a negative regulator  
329 interacting with transcription factors in specific location in the nucleus or the chromatin and preventing  
330 their action by, for example, targeting them for degradation. Recognition of PARylated proteins by RCD1  
331 could serve a scaffolding function, bringing together the components of the complex in NBs, including  
332 PARylated proteins, transcription factors, and regulatory protein kinases like PPKs.

333 Analysis of WWE domain proteins in animals has shown that the WWE domains co-exist in proteins not  
334 only with PARP/PARP-like domains, but also with E3 ubiquitin-ligase domains (Aravind 2001; Wang  
335 *et al*, 2012), which are involved in proteasomal degradation processes. Intriguingly, a significant fraction  
336 of transcription factors interacting with RCD1 is known to be regulated by proteasomal degradation (Qin  
337 *et al*, 2008; Ni *et al*, 2017; Favero *et al*, 2020). Furthermore, several proteins related to ubiquitin-  
338 dependent protein catabolism co-immunoprecipitated with RCD1 (Shapiguzov *et al*, 2019) and gene  
339 ontology analysis of altered gene expression in the *rcd1* mutant revealed enrichment in ubiquitin-  
340 proteasome-pathway associated genes (Jaspers *et al*, 2009). This supports a functional link between  
341 RCD1 and the nuclear proteasomal apparatus in Arabidopsis and suggests an evolutionary conserved link  
342 of PARylation and PAR readers with proteasomal degradation.

343 **Phosphorylation affects RCD1 stability and function**

344 Hub proteins are often targets for multiple regulatory modifications enabling their involvement in a  
345 variety of upstream signaling processes. For example, RCD1 has recently been shown to perceive signals  
346 from organelles through thiol redox relays (Shapiguzov *et al*, 2019). Protein phosphorylation is another  
347 example of a ubiquitous post-translational protein modification that plays a major role in almost all  
348 physiological processes (Mergner *et al*, 2020). RCD1 is an *in vivo* phosphoprotein; overall, 13 phospho-  
349 peptides harboring potentially 30 phosphosites have been identified after immunoprecipitation of RCD1  
350 from protein extracts. Notably, these phosphosites were enriched in the IDRs at the N-terminus as well  
351 as between the WWE, PARP-like, and RST domains of RCD1 (**Figure 5A**) and phosphorylation of these  
352 IDRs may have different function and outcome.

353 It has been shown that protein kinases preferentially target IDRs, and that phosphorylation can trigger  
354 disorder-to-order transitions of the protein structure (Iakoucheva *et al*, 2004; Bah & Forman-Kay, 2016).  
355 Structural analysis of RCD1 *in vitro* has shown that the disordered parts of the RST domain adapt their  
356 final folding only upon interaction with different transcription factors (Bugge *et al*, 2018; Shapiguzov *et*  
357 *al*, 2019). Additional phosphorylation of IDRs flanking the RST domain (IDR3 and IDR4) may influence  
358 the structure of RCD1 and its interaction with transcription factors *in vivo*.

359 In addition to the C-terminal phosphopeptides flanking the RST domain, we identified a phosphorylation  
360 hotspot in IDR2 between the WWE and the PARP-like domains targeted by PPKs. The IDR2 has recently  
361 been shown to be important for homo- or heterodimerization of RCD1 and its closest homolog SRO1  
362 (Wirthmüller *et al*, 2018). Consequently, phosphorylation of IDR2 may affect the overall scaffolding  
363 structure of RCD1 and therefore regulate a wide variety of protein-protein interactions. Lack of  
364 phosphorylation of IDR2 in the RCD1<sup>S/T</sup>IDR2<sup>A</sup> variant prevented full complementation of the *rcd1*  
365 phenotypes; however, it did not affect PAR binding *in-vitro*. It might be that the protein tertiary structure  
366 changed so that it cannot bind transcription factors. More likely, however, the RCD1<sup>S/T</sup>IDR2<sup>A</sup> variant  
367 might still interact with transcription factors via the unaffected C-terminal RST domain. In this scenario,  
368 phosphorylation by PPKs would be necessary for targeting RCD1 and its partner transcription factors for  
369 degradation, and thus for the function of RCD1 as a negative transcriptional co-regulator. Supporting  
370 this mode of action: the activity of PPK4 delays flowering (Kang *et al*, 2020), while RCD1<sup>S/T</sup>IDR2<sup>A</sup>  
371 results in early flowering similarly to *rcd1*. Accordingly the overexpression of the RCD1 interacting  
372 transcription factors BBX24 and FBH3 (Jaspers *et al*, 2009; Jaspers *et al*, 2010) has been shown to induce  
373 early flowering (Li *et al*, 2014; Ito *et al*, 2012). Thus in wild-type plants, these transcription factors may

374 complex with RCD1 and after IDR2 gets phosphorylated by PPK4, be targeted for proteasomal  
375 degradation and thereby preventing overaccumulation of BBX24 and FBH3 that would cause early  
376 flowering.

377 IDR2 has also been reported to be required for the interaction between RCD1 and the oomycete effector  
378 protein HaRxL106 that prevents activation of plant immunity (Wirthmüller *et al*, 2018). Similarly, a  
379 *Phytophthora* RxLR effector has been shown to prevent relocalization of two tobacco NAC transcription  
380 factors from the endoplasmic reticulum to nucleus, which promoted disease progression (McLellan *et al*,  
381 2013). Interestingly these tobacco NAC transcription factors, NTP1 and NTP2, are homologs of  
382 Arabidopsis ANAC013 and ANAC017, which are negatively regulated by RCD1 (Shapiguzov *et al*,  
383 2019). Furthermore, it has been shown that ASK $\alpha$ , a potential upstream kinase of RCD1, has been  
384 contributing to plant immunity by modulating the oxidative pentose phosphate pathway (Stampfl *et al*,  
385 2016). These results link RCD1 to the regulation of plant immunity and the phosphorylation of IDR2  
386 appears to be involved in these processes.

387 Our results suggest that phosphorylation of RCD1 by PPKs regulates RCD1 stability. This is supported  
388 by the higher abundance of endogenous RCD1 in *ppk124* and *ppk234* triple mutants (**Figure 6A**).  
389 Accordingly, the *ppk124* and *ppk234* triple mutants exhibited increased sensitivity to MV as compared  
390 to wild type. Interestingly expression of the RCD1<sup>S/T</sup>IDR2<sup>A</sup> form in *rcd1* led to only partial  
391 complementation of *rcd1* MV tolerance. This suggests that phosphorylation of IDR2 may not only be  
392 essential for RCD1 turnover alone or in complex with transcription factors but also for its function as  
393 transcriptional co-regulator.

394 Phosphorylation of other proteins by PPKs has been shown to alter protein stability (Liu *et al*, 2017; Ni  
395 *et al*, 2017; Chen *et al*, 2018). Ni *et al* (2017) described that PPKs phosphorylate the phyB-PIF3 complex  
396 upon light exposure, thereby targeting it for degradation - with an additional unknown factor X involved  
397 in the process. Intriguingly, RCD1 interacts with several PIFs, including PIF3 (Jaspers *et al*, 2009), which  
398 also localize to NBs (Favero, 2020). Moreover, PIF3 has been connected to retrograde signaling from  
399 the chloroplast (Martin *et al.*, 2016), a process where RCD1 also plays a role (Shapiguzov *et al*, 2019).

400 The data presented here suggest a mechanism by which RCD1 levels could be regulated *via*  
401 phosphorylation by PPKs. This represents posttranslational control of a negative transcriptional co-

402 regulator. Such regulation would allow PPKs to adjust the functions of RCD1 in response to  
403 environmental stimuli.

## 404 **Conclusions**

405 Taken together, here we have provided experimental evidence for RCD1 as a PAR reader protein specific  
406 to plants. Our biochemical analyses revealed that the Arabidopsis RCD1 binds PAR and that the  
407 interaction is mediated by the WWE domain. The experimental data also suggests that RCD1 functions  
408 as a PAR-binding protein *in vivo*, making it a novel PAR reader protein described in plants. Furthermore,  
409 our results unveil a complex regulation of RCD1 function on post-translational level (**Figure 7**). RCD1  
410 is targeted by its bipartite N-terminal NLS sequence to the nucleus (#1 in Figure 7) where it interacts  
411 with various proteins, including PPKs (#2) and transcription factors (#3), and accumulates in a PAR-  
412 dependent manner in NBs of unknown nature and composition (#4). Localization of RCD1 to NBs is  
413 mediated by its WWE and PARP domains. The C-terminal RST domain interacts with transcription  
414 factors (#3 in Fig. 7; Jaspers *et al*, 2009, 2010; Bugge *et al*, 2018), but whether the transcription factor is  
415 attached to the RST domain when PPKs phosphorylate IDR2 (#5 in Figure 7) is not yet known. Similarly,  
416 the exact order of the events #2, #3, and #4 is undetermined and the several possibilities require further  
417 studies.

418 The ability of RCD1 to interact with a large number of transcription factors supports a function as a hub  
419 protein, which integrates various developmental as well as environmental signals. RCD1 might recognize  
420 PARylated proteins along the chromatin or in specific sub-nuclear domains and form complexes with  
421 transcription factors. Interaction with regulatory protein kinases PPKs and recruiting them to NBs would  
422 be a possible way of regulation of RCD1 function and stability of RCD1 and probably interacting  
423 transcription factors. Taken together, according to the data presented here, RCD1 represents the first  
424 described nuclear PAR-reader in plants. Therefore, our model proposes a new mechanism of fine-tuning  
425 transcriptional regulation, involving PAR-dependent compartmentalization and post-translational  
426 modification of the PAR-reader RCD1.

427

428



429 **MATERIALS AND METHODS**

430 ***Plants, mutants and chemical treatments.*** *Arabidopsis thaliana* plants were grown on soil (peat:  
431 vermiculite = 1:1) under white luminescent light (220-250  $\mu\text{mol m}^{-2} \text{s}^{-1}$ ) at a 12-hour photoperiod and  
432 22/18 °C. Seedlings were grown for 10 days on 1 x MS basal medium (Sigma) with 0.5 % Phytigel  
433 (Sigma). *Arabidopsis rcd1-4* mutant (GK-229D11) was used as a background for all complementation  
434 lines. The *ppk* triple mutants were kindly provided by Dr Dmitri Nusinow (Donald Danforth Plant  
435 Science Center, St. Louis) and have been described in Huang *et al.*, (2016). Treatments with chemicals  
436 methyl viologen (MV, 0.1, 0.5, or 1  $\mu\text{M}$ , as indicated in the figures) and 3-methoxybenzamide (3MB, 10  
437 mM) were performed on leaf discs floating on Milli-Q water supplemented with 0.05% Tween 20  
438 (Sigma), overnight at room temperature or at 4°C, accordingly. For 4',6-diamidino-2-phenylindole  
439 (DAPI) staining, the seedlings were vacuum-infiltrated with 0.1 mM DAPI in Milli-Q water  
440 supplemented with 0.05% Tween 20.

441 ***Plasmids.*** Full-length AtRCD1, the WWE-domain (amino acids 1-155), RCD1 $\Delta$ WWE (consisting of  
442 PARP- and RST-domains, amino acids 241-589), RCD1 $\Delta$ PARP (missing the residues 304-443) and the  
443 C-terminal part of RCD1 including the RST-domain (amino acids 468-589), were cloned into pGEX4T-  
444 1 for N-terminal GST fusion using primers listed in **Supplementary table 3**. Full-length AtRCD1 was  
445 also cloned into the pET8c vector for N-terminal His-fusion (Jaspers *et al.*, 2010). For generating N-  
446 terminal GST-fusion constructs, PPK1-4 cDNAs were cloned into pGEX6P-1, and ASK cDNAs into  
447 pGEX4T-1. The kinase-dead ASK loss-of-function constructs contain a Lys-Arg mutation in the kinase  
448 activation loop.

449 For generating a GST fusion construct of RCD1 where the IDR2 is non-phosphorylatable (GST-  
450 RCD1<sup>S/T</sup>IDR2<sup>A</sup>), all phospho-serine and phospho-threonine residues within IDR2 were mutated to  
451 alanine residues by gene synthesis (Genescript Biotech, Netherlands).

452 To generate the RCD1-Venus construct, RCD1 cDNA was fused to the *UBIQUITIN10* promoter region  
453 and to the C-terminal triple Venus YFP tag in a MultiSite Gateway reaction as described in Siligato *et*  
454 *al.*, (2016). The  $\Delta$ WWE (missing the residues 90-151),  $\Delta$ PARP (missing the residues 304-443) and  $\Delta$ RST  
455 (missing the residues 462-589) deletions were introduced by PCR using primers listed in **Supplementary**  
456 **table 3** and end-joining using In-Fusion (Clontech).

457 Construction of transgenic lines expressing HA-tagged RCD1 (RCD1-3xHA) is described in Jaspers *et*  
458 *al.*, (2009). RCD1 $nls$ -HA variant was made using the vector pDONR/Zeo that contained the RCD1

459 promoter followed by the wild-type genomic RCD1 sequence (Jaspers *et al*, 2009). PCR was performed  
460 with Q5 High-Fidelity DNA Polymerase (New England Biolabs) and the primers listed in  
461 **Supplementary table 3**. After sequential mutation of the two parts of the bipartite NLS, the construct  
462 was transferred to the Gateway pGWB13 binary vector and introduced into the plants as described in  
463 Jaspers *et al*, (2009). The  $\Delta$ WWE (missing the residues 90-151),  $\Delta$ PARP (missing the residues 304-443)  
464 and  $\Delta$ RST (missing the residues 462-589) deletions were introduced by PCR using primers listed in  
465 **Supplementary table 3** and end-joining using In-Fusion (Takara).

466 For generating epitope-tagged PPK fusions, the coding sequences of the four *PPK* genes lacking their  
467 stop codons were cloned into NcoI/XhoI-digested pENTR4 using In-Fusion enzyme (Takara). The *PPK*  
468 coding sequences were then recombined by Gateway® Clonase II reactions into pH7WGR2 (Karimi *et*  
469 *al*, 2002) or pGWB414 (Nakagawa *et al*, 2007) to create RFP and 3xHA-tagged variants, respectively.

470 ***Spectroscopic measurements of photosynthesis.*** Chlorophyll fluorescence was measured by MAXI  
471 Imaging PAM (Walz, Germany) essentially as described in Shapiguzov *et al*, (2019). PSII  
472 photoinhibition protocol consisted of repetitive 1-hour periods of blue actinic light (450 nm, 80  $\mu\text{mol m}^{-2}$   
473  $\text{s}^{-1}$ ) each followed by a 20-min dark adaptation, then  $F_o$  and  $F_m$  measurement. PSII photochemical yield  
474 was calculated as  $F_v/F_m = (F_m - F_o)/F_m$ . The assays were performed in 96-well plates. In each assay leaf  
475 discs from at least 4 individual plants were analyzed. Each assay was reproduced at least three times.

476 ***SDS-PAGE and immunoblotting.*** For immunoblotting of total plant extracts, the plant material was  
477 frozen immediately after treatments in liquid nitrogen and ground. Total proteins were extracted in SDS  
478 extraction buffer (50 mM Tris, pH 7.8, 2 % SDS, 1 x protease inhibitor cocktail; P9599, Sigma), 2 mg/  
479 mL NaF) for 20 min at 37°C and centrifuged at 18 000 x g for 10 min. Supernatants were normalized for  
480 protein concentration and resolved by SDS-PAGE. After electrophoresis, proteins were electroblotted to  
481 PVDF membrane and probed with specific antibodies:  $\alpha$ HA (Roche),  $\alpha$ GFP (Milteny Biotech),  $\alpha$ GST  
482 (Sigma),  $\alpha$ PAR (Trevigen),  $\alpha$ RCD1 (Shapiguzov *et al*, 2019), and  $\alpha$ AOX1/2 (Agrisera AS04 054). The  
483 signal was visualized by ECL Prime chemiluminescence reagents (GE Healthcare). Quantification of the  
484 signal was done using ImageJ.

485 ***Confocal microscopy.*** The subcellular localization of RCD1 in stable expression Arabidopsis line was  
486 analyzed by confocal microscopy with a Leica SP5 II HCS inverted microscope using a solid-state blue  
487 laser was used for visualizing YFP and chloroplast autofluorescence (detection with 521–587 and 636–  
488 674 nm range, respectively). For co-localization studies of RCD1-Venus and PPK-RFP fusion constructs,

489 the binary plasmids were transformed into *A. tumefaciens* strain GV3101 pMP90. Proteins were  
490 transiently expressed in *N. benthamiana* leaves as described below for co-immunoprecipitation assays.  
491 YFP was excited using a 488 nm laser with a detection window of 519-556 nm and RFP was excited  
492 using a 561 nm laser with detection at 599-657 nm.

493 **Protein expression and purification.** Fusion proteins were expressed in *E.coli* BL21 (DE3) Codon Plus  
494 strain and purified using GSH- or Ni<sup>2+</sup>- Sepharose beads (GE Healthcare) according to manufacturer  
495 instructions as described before (Jaspers *et al*, 2009; Jaspers *et al*, 2010). The N-terminal GST-tagged  
496 WWE-domain of RNF146 (amino acids 100-175) was expressed and purified as described in Zhang *et al*  
497 *al*, (2011).

498 **Poly(ADP-ribose) dot-blot assay.** Purified His and GST fusion proteins or GST alone (500 ng) were  
499 blotted onto nitrocellulose membrane (BioRad). The nitrocellulose membrane was rinsed with TBS-T  
500 buffer (10 mM Tris-HCl at pH 7.4, 150 mM NaCl and 0.05 % Tween 20) three times. The membrane  
501 was incubated with 100 nM of purified PAR (Trevigen, 4336-100-01, 10 μM stock, polymer size 2-300  
502 units) for 1 h at room temperature. After 5 washes with TBS-T and TBS-T containing 1 M NaCl, the  
503 membrane was blocked with 5 % milk followed by immunoblotting with mouse αPAR (Trevigen) or  
504 αGST (Sigma) antibody.

505 **Surface plasmon resonance.** Recombinant RCD1-His and GST-RCD1ΔWWE proteins were coupled to  
506 a Biacore CM5 sensor chip *via* amino-groups. PAR (625 nM) was profiled at a flow rate of 30 mL/min  
507 for 300 s, followed by 600 s flow of wash buffer (10 mM HEPES, pH 7.4, 150 mM NaCl, 3 mM EDTA,  
508 0.05% Surfactant P20). Mono ADP-ribose and cyclic ADP-ribose were profiled at 1 mM concentration.  
509 After analysis in BiaEvaluation (Biacore), the normalized resonance units were plotted over time with the  
510 assumption of one-to-one binding.

### 511 **Transient protein expression in *N. benthamiana* and *Arabidopsis***

512 Binary vectors harbouring RCD1-GFP or PPK-3xHA fusions were transformed into *A. tumefaciens* strain  
513 GV3101 pMP90. For expression, Agrobacteria were scraped from selective YEB plates and resuspended  
514 in infiltration medium (10 mM MES pH 5.6, 10 mM MgCl<sub>2</sub>) and the OD<sub>600</sub> was adjusted to 0.8. To  
515 suppress transgene silencing, Agrobacteria expressing the tomato bushy stunt virus 19K silencing  
516 suppressor were co-infiltrated. After adding acetosyringone to a final concentration of 100 μM and

517 incubation for 2 h at room temperature, *Agrobacteria* were mixed in a ratio of 1:1:2 (19K) and infiltrated  
518 into *N. benthamiana* leaves.

519 For transient *Arabidopsis* expression the FAST co-cultivation technique was used (Li *et al*, 2009). In  
520 short binary vectors harbouring PPK-RFP fusions were transformed into *A. tumefaciens* strain GV3101  
521 pMP90. From overnight liquid LB-culture *Agrobacteria* were washed and resuspended in co-cultivation  
522 medium to OD<sub>600</sub> 2.5. Seedlings grown for 5 days in long days (16/8, light/dark) were soaked in  
523 *Agrobacteria* containing co-cultivation medium for 20 minutes.

524 ***Co-immunoprecipitation.*** Infiltrated leaf tissue was harvested 72 h later and proteins were extracted by  
525 grinding leaf tissue in liquid nitrogen followed by resuspension in extraction buffer (50 mM Tris-HCl  
526 pH 7.5, 150 mM NaCl, 10% Glycerol, 1 mM EDTA, 5 mM DTT, 1x protease inhibitor cocktail [P9599,  
527 Sigma], 10 μM MG132) at a ratio of 2 mL / g FW. Protein extracts were centrifuged at 20000 x g / 4°C/20  
528 min and a fraction of the supernatant was saved as ‘input’ sample. 15 μL of αGFP-nanobody:Halo:His6  
529 magnetic beads (Chen *et al*, 2018) were added to 1.5 mL of protein extract followed by incubation on a  
530 rotating wheel at 4°C for 5 min. The beads were washed 3 times with 1 mL extraction buffer using a  
531 magnetic tube rack and then boiled in 80 μL SDS sample buffer to elute protein from the beads. For  
532 immunoblots, protein samples were separated by SDS-PAGE and electro-blotted onto PVDF membrane.  
533 Antibodies used were αGFP (210-PS-1GP, Amsbio) and αHA (11867423001, Sigma).

534 ***Kinase activity assays.*** *In vitro* kinase assays using recombinant proteins were performed in a total  
535 volume of 20 μL of kinase buffer (20 mM HEPES, pH 7.5, 15 mM MgCl<sub>2</sub>, and 5 mM EGTA). The  
536 reaction was started with 2 μCi [γ-<sup>32</sup>P]ATP and incubated at room temperature for 30 min. The reaction  
537 was stopped by the addition of 5 μL of 4x SDS loading buffer. Proteins were resolved by SDS-PAGE  
538 and the gel was dried and exposed overnight to a phosphor imager screen. For the kinase activity test,  
539 GST-PPKs were tested against 5 μg myelin basic protein (MBP; Sigma Aldrich) and 5 μg Casein in 0.1  
540 M Tris pH 8.8 (Sigma). For identification of *in vitro* phosphorylation sites by LC-MS/MS, 1.5 mM  
541 unlabeled ATP was used in the kinase buffer. The proteins were separated by SDS-PAGE, followed by  
542 Coomassie Brilliant Blue staining and were digested by trypsin (Promega).

543 ***LC-MS/MS.*** Phosphopeptides were enriched from tryptic digests using TiO<sub>2</sub> microcolumns (GL  
544 Sciences Inc., Japan) as described in Larsen *et al*, (2005). Enriched phosphopeptides were analyzed by a  
545 Q Exactive mass spectrometer (Thermo Fisher Scientific) connected to Easy NanoLC 1000 (Thermo  
546 Fisher Scientific). Peptides were first loaded on a trapping column and subsequently separated inline on

547 a 15-cm C18 column (75  $\mu\text{m}$   $\times$  15 cm, ReproSil-Pur 5  $\mu\text{m}$  200  $\text{\AA}$  C18-AQ, Dr. Maisch HPLC). The  
548 mobile phase consisted of water with 0.1% (v/v) formic acid (solvent A) or acetonitrile/water (80:20  
549 [v/v]) with 0.1% (v/v) formic acid (solvent B). A linear 60-min gradient from 6 to 42% (v/v) B was used  
550 to elute peptides. Mass spectrometry data were acquired automatically by using Xcalibur 3.1 software  
551 (Thermo Fisher Scientific). An information-dependent acquisition method consisted of an Orbitrap mass  
552 spectrometry survey scan of mass range 300 to 2000 m/z (mass-to-charge ratio) followed by higher-  
553 energy collisional dissociation (HCD) fragmentation for 10 most intense peptide ions. Raw data were  
554 searched for protein identification by Proteome Discoverer (version 2.2) connected to in-house Mascot  
555 (v. 2.6.1) server. Phosphorylation site locations were validated using phosphoRS algorithm. A SwissProt  
556 database (<https://www.uniprot.org/>) was used with a taxonomy filter Arabidopsis. Two missed cleavages  
557 were allowed. Peptide mass tolerance  $\pm$  10 ppm and fragment mass tolerance  $\pm$  0.02 D were used.  
558 Carbamidomethyl (C) was set as a fixed modification and Met oxidation, acetylation of protein N-  
559 terminus, and phosphorylation of Ser and Thr were included as variable modifications. Only peptides  
560 with a false discovery rate of 0.01 were used.

561

## 562 ACKNOWLEDGEMENTS

563 We thank Mr Damien Marchese and Dr. Melanie Carmody for the help in generating the transgenic lines.  
564 We thank Dr. Dmitri Nusinow for providing the seeds of *ppk* triple mutants. We thank Maria Aatonen  
565 and Maria Semenova for help in Biacore experiments which were performed at the Biomolecular  
566 Interaction Unit, Faculty of Biological and Environmental Sciences, University of Helsinki. We thank  
567 Mika Molin and Marko Crivaro for help with confocal microscopy at the Light Microscopy Unit of the  
568 Institute of Biotechnology, University of Helsinki. We thank Dr. Romy Schmidt for her input in studying  
569 the RCD1 nuclear bodies. Mass spectrometry analyses were performed at the Turku Proteomics Facility,  
570 supported by Biocenter Finland. This work was supported by the University of Helsinki (JK); the  
571 Academy of Finland Centre of Excellence programs (2006-11; and 2014-19; JK) and Research Grant  
572 (Decision 250336; JK). MW acknowledges funding from the Academy of Finland (Decisions 275632,  
573 283139, 312498, and 323917). LW acknowledges funding by the German Research Foundation (DFG;  
574 grant WI 3670/2-1) and core funding from the Leibniz Institute of Plant Biochemistry (IPB) and the FU  
575 Berlin Dahlem Centre of Plant Sciences. RG acknowledges funding from the Doctoral Programme in  
576 Plant Sciences by the University of Helsinki.

577 AUTHOR CONTRIBUTION

578 JV, AS, JKW, RG, CJ, LW, MW, and JK conceived and designed experiments. JV, AS, JKW, RG, RDM,  
579 ID, TP, NB, and LW carried out experiments. JV, AS, JKW, RG, RDM, ID, NB, CJ, LW, MW, and JK  
580 analyzed the data. JV, AS, JKW, RG, LW, and JK wrote the article. All authors read and contributed to  
581 the final article.

582 REFERENCES

- 583 **Adams-Phillips L, Briggs AG, Bent AF. 2010.** Disruption of poly(ADP-ribosylation) mechanisms  
584 alters responses of Arabidopsis to biotic stress. *Plant Physiology* **152**:267–280
- 585 **Ahel I, Ahel D, Matsusaka T, Clark AJ, Pines J, Boulton SJ, West SC. 2008.** Poly(ADP-ribose)-  
586 binding zinc finger motifs in DNA repair/checkpoint proteins. *Nature* **451**:81–85.
- 587 **Ahlfors R, Lång S, Overmyer K, Jaspers P, Brosché M, Tauriainen A, Kollist H, Tuominen H,**  
588 **Belles-Boix E, Piippo M et al. 2004.** Arabidopsis RADICAL-INDUCED CELL DEATH1 belongs to  
589 the WWE protein-protein interaction domain protein family and modulates abscisic acid, ethylene, and  
590 methyl jasmonate responses. *Plant Cell* **16**:1925-1937.
- 591 **Aravind L. 2001.** The WWE domain: a common interaction module in protein ubiquitination and ADP  
592 ribosylation. *Trends in Biochemical Sciences* **26**:273-275.
- 593 **Babiychuk E, Cottrill PB, Storozhenko S, Fuangthong M, Chen Y, O'Farrell MK, Van Montagu**  
594 **M, Inzé D, Kushnir S. 1998.** Higher plants possess two structurally different poly(ADP-ribose)  
595 polymerases. *The Plant Journal* **15**:635-645.
- 596 **Bah A, Forman-Kay JD. 2016.** Modulation of intrinsically disordered protein function by post-  
597 translational modifications. *Journal of Biological Chemistry* **291**:6696-6705.
- 598 **Briggs AG, Bent AF. 2011.** Poly(ADP-ribosylation) in plants. *Trends in Plant Science* **16**:372–380.
- 599 **Brosché M, Blomster T, Salojärvi J, Cui F, Sipari N, Leppälä J, Lamminmäki A, Tomai G,**  
600 **Narayanasamy S, Reddy RA et al. 2014.** Transcriptomics and functional genomics of ROS-induced  
601 cell death regulation by RADICAL-INDUCED CELL DEATH1. *PLoS Genetics* **10**:e1004112.
- 602 **Bugge K, Staby L, Kemplen KR, O'Shea C, Bendsen SK, Jensen MK, Olsen JG, Skriver K,**  
603 **Kragelund BB. 2018.** Structure of Radical-Induced Cell Death1 hub domain reveals a common  $\alpha$ -  
604 scaffold for disorder in transcriptional networks. *Structure* **26**:734-746.
- 605 **Chen C, Masi R, Lintermann R, Wirthmueller L. 2018.** Nuclear import of *Arabidopsis* poly(ADP-  
606 ribose) polymerase 2 is mediated by importin- $\alpha$  and a nuclear localization sequence located between  
607 the predicted SAP domains. *Frontiers in Plant Science* **9**:1581.
- 608 **Chen HH, Qu L, Xu ZH, Zhu JK, Xue HW. 2018.** EL1-like casein kinases suppress ABA signaling  
609 and responses by phosphorylating and destabilizing the ABA receptors PYR/PYLs in *Arabidopsis*.  
610 *Molecular Plant* **11**:706-719.

- 611 **Christensen LF, Staby L, Bugge K, O'Shea C, Kragelund BB, Skriver K. 2019.** Evolutionary  
612 conservation of the intrinsic disorder-based Radical-Induced Cell Death1 hub interactome. *Scientific*  
613 *Reports* **9**:18927.
- 614 **Christians MJ, Gingerich DJ, Hua Z, Lauer TD, Vierstra RD. 2012.** The light-response BTB1 and  
615 BTB2 proteins assemble nuclear ubiquitin ligases that modify phytochrome B and D signaling in  
616 *Arabidopsis*. *Plant Physiology* **160**:118-134.
- 617 **Cohen MS, Chang P. 2018.** Insights into the biogenesis, function, and regulation of ADP-ribosylation.  
618 *Nature Chemical Biology* **14**:236-243.
- 619 **DaRosa PA, Wang Z, Jiang X, Pruneda JN, Cong F, Klevit RE, Xu W. 2015.** Allosteric activation  
620 of the RNF146 ubiquitin ligase by a poly(ADP-ribosylation) signal. *Nature* **517**:223-226.
- 621 **Favero DS. 2020.** Mechanisms regulating PIF transcription factor activity at the protein level.  
622 *Physiologia Plantarum* **169**:325-335.
- 623 **Feng B, Liu C, de Oliveira MV, Intorne AC, Li B, Babilonia K, de Souza Filho GA, Shan L, He P.**  
624 **2015.** Protein poly(ADP-ribosylation) regulates *Arabidopsis* immune gene expression and defense  
625 responses. *PLoS Genetics* **11**:e1004936
- 626 **Feng B, Ma S, Chen S, Zhu N, Zhang S, Yu B, Yu Y, Le B, Chen X, Dinesh-Kumar SP et al. 2016.**  
627 PARylation of the Forkhead-associated domain protein DAWDLE regulates plant immunity. *EMBO*  
628 *Reports* **17**:1799-1813.
- 629 **Fujibe T, Saji H, Arakawa K, Yabe N, Takeuchi Y, Yamamoto KT. 2004.** A methyl viologen-  
630 resistant mutant of *Arabidopsis*, which is allelic to ozone-sensitive *rcd1*, is tolerant to supplemental  
631 ultraviolet-B irradiation. *Plant Physiology* **134**:275-285.
- 632 **Gupte R, Liu Z, Kraus WL. 2017.** PARPs and ADP-ribosylation: recent advances linking molecular  
633 functions to biological outcomes. *Genes & Development* **31**:101-126.
- 634 **He F, Tsuda K, Takahashi M, Kuwasako K, Terada T, Shirouzu M, Watanabe S, Kigawa T,**  
635 **Kobayashi N, Güntert P et al. 2012.** Structural insight into the interaction of ADP-ribose with the  
636 PARP WWE domains. *FEBS Letters* **586**:3858-3864.
- 637 **Hiltscher H, Rudnik R, Shaikhali J, Heiber I, Mellenthin M, Meirelles Duarte I, Schuster G,**  
638 **Kahmann U, Baier M. 2014.** The radical induced cell death protein 1 (RCD1) supports transcriptional  
639 activation of genes for chloroplast antioxidant enzymes. *Frontiers in Plant Science* **5**:475.



- 640 **Huang H, Alvarez S, Bindbeutel R, Shen Z, Naldrett MJ, Evans BS, Briggs SP, Hicks LM, Kay**  
641 **SA, Nusinow DA. 2016.** Identification of Evening complex associated proteins in *Arabidopsis* by affinity  
642 purification and mass spectrometry. *Molecular and Cellular Proteomics* **15**:201-217.
- 643 **Iakoucheva LM, Radivojac P, Brown CJ, O'Connor TR, Sikes JG, Obradovic Z, Dunker AK. 2004.**  
644 The importance of intrinsic disorder for protein phosphorylation. *Nucleic Acids Research* **32**:1037-1049.
- 645 **Ito, S., Song, Y. H., Josephson-Day, A. R., Miller, R. J., Breton, G., Olmstead, R. G., & Imaizumi,**  
646 **T. 2012.** FLOWERING BHLH transcriptional activators control expression of the photoperiodic  
647 flowering regulator CONSTANS in *Arabidopsis*. *Proceedings of the National Academy of*  
648 *Sciences*, **109**:3582-3587
- 649 **Jaspers P, Blomster T, Brosché M, Salojärvi J, Ahlfors R, Vainonen JP, Reddy RA, Immink R,**  
650 **Angenent G, Turck F et al. 2009.** Unequally redundant RCD1 and SRO1 mediate stress and  
651 developmental responses and interact with transcription factors. *The Plant Journal* **60**:268-279.
- 652 **Jaspers P, Overmyer K, Wrzaczek M, Vainonen JP, Blomster T, Salojärvi J, Reddy RA,**  
653 **Kangasjärvi J. 2010.** The RST and PARP-like domain containing SRO protein family: analysis of  
654 protein structure, function and conservation in land plants. *BMC Genomics* **11**:170.
- 655 **Jespersen N, Barbar E. 2020.** Emerging Features of Linear Motif-Binding Hub Proteins. *Trends in*  
656 *Biochemical Sciences* **45**:375-384.
- 657 **Jungmichel S, Rosenthal F, Altmeyer M, Lukas J, Hottiger MO, Nielsen ML. 2013.** Proteome-wide  
658 identification of poly(ADP-Ribosyl)ation targets in different genotoxic stress responses. *Molecular Cell*  
659 **52**:272–285.
- 660 **Kang J, Cui H, Jia S, Liu W, Yu R, Wu Z, Wang Z. 2020.** *Arabidopsis thaliana* MLK3, a Plant-  
661 Specific Casein Kinase 1, Negatively Regulates Flowering and Phosphorylates Histone H3 In  
662 Vitro. *Genes* **11**:345.
- 663 **Karimi M, Inzé D, Depicker A. 2002.** GATEWAY vectors for *Agrobacterium*-mediated plant  
664 transformation. *Trends in Plant Science* **7**:193-195.
- 665 **Kim DS, Challa S, Jones A, Kraus WL. 2020.** PARPs and ADP-ribosylation in RNA biology: from  
666 RNA expression and processing to protein translation and proteostasis. *Genes & Development* **34**:302-  
667 320.
- 668 **Kragelund BB, Jensen MK, Skriver K. 2012.** Order by disorder in plant signaling. *Trends in Plant*  
669 *Science* **17**:625-32.

- 670 **Lamb RS, Citarelli M, Teotia S. 2012.** Functions of the poly(ADP-ribose) polymerase superfamily in  
671 plants. *Cellular and Molecular Life Sciences* **69**:175–189.
- 672 **Leung AKL. 2017.** PARPs. *Current Biology* **27**:R1256-R1258.
- 673 **Li, F., Sun, J., Wang, D., Bai, S., Clarke, A. K., & Holm, M. 2014.** The B-box family gene STO  
674 (BBX24) in *Arabidopsis thaliana* regulates flowering time in different pathways. *PLoS one* **9**: e87544.
- 675 **Li JF, Park E, von Arnim AG, Nebenführ A. 2009.** The FAST technique: a simplified  
676 Agrobacterium-based transformation method for transient gene expression analysis in seedlings of  
677 *Arabidopsis* and other plant species. *Plant Methods* **5**:6.
- 678 **Liu Q, Wang Q, Deng W, Wang X, Piao M, Cai D, Li Y, Barshop WD, Yu X, Zhou T et al. 2017.**  
679 Molecular basis for blue light-dependent phosphorylation of *Arabidopsis* cryptochrome 2. *Nature*  
680 *Communications* **8**:15234.
- 681 **Love AJ, Yu C, Petukhova NV, Kalinina NO, Chen J, Taliansky ME. 2017.** Cajal bodies and their  
682 role in plant stress and disease responses. *RNA Biology* **14**:779-790.
- 683 **Mao YS, Zhang B, Spector DL. 2011.** Biogenesis and function of nuclear bodies. *Trends in Genetics*  
684 **27**:295-306.
- 685 **Martello R, Leutert M, Jungmichel S, Bilan V, Larsen SC, Young C, Hottiger MO, Nielsen ML.**  
686 **2016.** Proteome-wide identification of the endogenous ADP-ribosylome of mammalian cells and tissue.  
687 *Nature Communications* **7**:12917.
- 688 **Martín G, Leivar P, Ludevid D, Tepperman JM, Quail PH, Monte E. 2016.** Phytochrome and  
689 Retrograde Signalling Pathways Converge to Antagonistically Regulate a Light-Induced Transcriptional  
690 Network. *Nature Communications* **7**:11431.
- 691 **McLellan H, Boevink PC, Armstrong MR, Pritchard L, Gomez S, Morales J, Whisson SC, Beynon**  
692 **JL, Birch PR. 2013.** An RxLR effector from *Phytophthora infestans* prevents re-localisation of two plant  
693 NAC transcription factors from the endoplasmic reticulum to the nucleus. *PLoS Pathogens* **9**:e1003670.
- 694 **Mergner J, Frejno M, List M, Papacek M, Chen X, Chaudhary A, Samaras P, Richter S, Shikata**  
695 **H, Messerer M et al. 2020.** Mass-spectrometry-based draft of the *Arabidopsis* proteome. *Nature*  
696 **579**:409-414.
- 697 **Nakagawa T, Suzuki T, Murata S, Nakamura S, Hino T, Maeo K, Tabata R, Kawai T, Tanaka K,**  
698 **Niwa Y et al. 2007.** Improved Gateway binary vectors: high-performance vectors for creation of fusion  
699 constructs in transgenic analysis of plants. *Bioscience Biotechnology, and Biochemistry* **71**: 2095-2100.

- 700 **Ni W, Xu SL, Gonzalez-Grandio E, Chalkley RJ, Huhmer AFR, Burlingame AL, Wang ZY, Quail**  
701 **PH. 2017.** PPKs mediate direct signal transfer from phytochrome photoreceptors to transcription factor  
702 PIF3. *Nature Communications* **8**:15236.
- 703 **O'Shea C, Staby L, Bendtsen SK, Tidemand FG, Redsted A, Willemoës M, Kragelund BB, Skriver**  
704 **K. 2017.** Structures and short linear motif of disordered transcription factor regions provide clues to the  
705 interactome of the cellular hub protein Radical-induced Cell Death1. *Journal of Biological Chemistry*  
706 **292**:512-527.
- 707 **Overmyer K, Tuominen H, Kettunen R, Betz C, Langebartels C, Sandermann H Jr, Kangasjärvi**  
708 **J. 2000.** Ozone-sensitive *Arabidopsis rcd1* mutant reveals opposite roles for ethylene and jasmonate  
709 signaling pathways in regulating superoxide-dependent cell death. *Plant Cell* **12**:1849-1862.
- 710 **Palazzo L, Leidecker O, Prokhorova E, Dauben H, Matic I, Ahel I. 2018.** Serine is the major residue  
711 for ADP-ribosylation upon DNA damage. *Elife* **7**: e34334.
- 712 **Qin F, Sakuma Y, Tran LS, Maruyama K, Kidokoro S, Fujita Y, Fujita M, Umezawa T, Sawano**  
713 **Y, Miyazono K et al. 2008.** *Arabidopsis* DREB2A-interacting proteins function as RING E3 ligases and  
714 negatively regulate plant drought stress-responsive gene expression. *Plant Cell* **20**, 1693–1707.
- 715 **Reddy AS, Day IS, Göhring J, Barta A. 2012.** Localization and dynamics of nuclear speckles in plants.  
716 *Plant Physiology* **158**:67-77.
- 717 **Rissel D, Peiter E. 2019.** Poly(ADP-Ribose) Polymerases in Plants and Their Human Counterparts:  
718 Parallels and Peculiarities. *International Journal of Molecular Sciences* **20**:1638.
- 719 **Saidi Y, Hearn TJ, Coates JC. 2012.** Function and evolution of 'green' GSK3/Shaggy-like kinases.  
720 *Trends in Plant Science* **17**:39-46.
- 721 **Shapiguzov A, Vainonen JP, Hunter K, Tossavainen H, Tiwari A, Järvi S, Hellman M, Aarabi F,**  
722 **Alseikh S, Wybouw B et al. 2019.** *Arabidopsis* RCD1 coordinates chloroplast and mitochondrial  
723 functions through interaction with ANAC transcription factors. *Elife* **8**: e43284.
- 724 **Siligato R, Wang X, Yadav SR, Lehesranta S, Ma G, Ursache R, Sevilem I, Zhang J, Gorte M,**  
725 **Prasad K et al. 2016.** MultiSite Gateway-compatible cell type-specific gene-inducible system for plants.  
726 *Plant Physiology* **170**: 627-641.
- 727 **Simon L, Voisin M, Tatout C, Probst AV. 2015.** Structure and function of centromeric and  
728 pericentromeric heterochromatin in *Arabidopsis thaliana*. *Frontiers in Plant Science* **6**:1049.
- 729 **Song J, Keppler BD, Wise RR, Bent AF. 2015.** PARP2 Is the predominant poly(ADP-Ribose)  
730 polymerase in *Arabidopsis* DNA damage and immune responses. *PLoS Genetics* **11**:e1005200.

- 731 **Stampfl H, Fritz M, Dal Santo S, Jonak C. 2016.** The GSK3/Shaggy-Like Kinase ASK $\alpha$  Contributes  
732 to Pattern-Triggered Immunity. *Plant Physiology* **171**:1366-1377.
- 733 **Su Y, Wang S, Zhang F, Zheng H, Liu Y, Huang T, Ding Y. 2017.** Phosphorylation of histone H2A  
734 at Serine 95: a plant-specific mark involved in flowering time regulation and H2A.Z deposition. *Plant*  
735 *Cell* **29**:2197-2213.
- 736 **Teloni F, Altmeyer M. 2016.** Readers of poly(ADP-ribose): designed to be fit for purpose. *Nucleic Acids*  
737 *Research* **44**:993-1006.
- 738 **Teotia S, Lamb RS. 2009.** The paralogous genes *RADICAL-INDUCED CELL DEATH1* and *SIMILAR*  
739 *TO RCD ONE1* have partially redundant functions during Arabidopsis development. *Plant Physiology*  
740 **151**:180-198.
- 741 **Vainonen JP, Jaspers P, Wrzaczek M, Lamminmäki A, Reddy RA, Vaahtera L, Brosché M,**  
742 **Kangasjärvi J. 2012.** RCD1-DREB2A interaction in leaf senescence and stress responses in  
743 *Arabidopsis thaliana*. *Biochemical Journal* **442**:573-581.
- 744 **Vainonen JP, Shapiguzov A, Vaattovaara A, Kangasjärvi J. 2016.** Plant PARPs, PARGs and  
745 PARP-like proteins. *Current Protein and Peptide Science* **17**:713-723.
- 746 **Van Buskirk EK, Decker PV, Chen M. 2012.** Photobodies in light signaling. *Plant Physiology*  
747 **158**:52-60.
- 748 **Wang Z, Michaud GA, Cheng Z, Zhang Y, Hinds TR, Fan E, Cong F, Xu W. 2012.** Recognition of  
749 the iso-ADP-ribose moiety in poly(ADP-ribose) by WWE domains suggests a general mechanism for  
750 poly(ADP-ribosyl)ation-dependent ubiquitination. *Genes & Development* **26**:235-240.
- 751 **Wang Z, Casas-Mollano JA, Xu J, Riethoven JJ, Zhang C, Cerutti H. 2015.** Osmotic stress induces  
752 phosphorylation of histone H3 at threonine 3 in pericentromeric regions of *Arabidopsis thaliana*.  
753 *Proceedings of the National Academy of Sciences, USA* **112**:8487-8492.
- 754 **Wirthmueller L, Asai S, Rallapalli G, Sklenar J, Fabro G, Kim DS, Lintermann R, Jaspers P,**  
755 **Wrzaczek M, Kangasjärvi J et al. 2018.** *Arabidopsis* downy mildew effector HaRxL106 suppresses  
756 plant immunity by binding to RADICAL-INDUCED CELL DEATH1. *New Phytologist* **220**:232-248.
- 757 **Zhang Y, Liu S, Mickanin C, Feng Y, Charlat O, Michaud GA, Schirle M, Shi X, Hild M, Bauer**  
758 **A et al. 2011.** RNF146 is a poly(ADP-ribose)-directed E3 ligase that regulates axin degradation and Wnt  
759 signalling. *Nature Cell Biology* **13**:623-629.
- 760 **Zhang YJ, Wang JQ, Ding M, Yu YH. 2013.** Site-specific characterization of the Asp- and Glu-ADP-  
761 ribosylated proteome. *Nature Methods* **10**:981–984.

762 **Zheng H, Zhang F, Wang S, Su Y, Ji X, Jiang P, Chen R, Hou S, Ding Y. 2018.** MLK1 and MLK2  
763 coordinate RGA and CCA1 to regulate hypocotyl elongation in *Arabidopsis thaliana*. *Plant Cell* **30**:67-  
764 82.  
765

Table 1: List of phosphosites identified *in vivo* or after *in vitro* kinase assay using PPKs.

| Phosphopeptide                                                       | Contained phosphosites                      | Study                                       |
|----------------------------------------------------------------------|---------------------------------------------|---------------------------------------------|
| VLD <sub>ss</sub> RCEDGFGK                                           | S11, S12                                    | <i>in vitro</i> PPK (a)                     |
| AA <sub>s</sub> YAAYVtGVsCAK                                         | S27, T33, S36                               | <i>in vivo</i> (b), <i>in vitro</i> PPK (a) |
| <i>LEIDVNGGEtPR</i>                                                  | T204                                        | <i>in vivo</i> (a, b)                       |
| <i>LNLEECsDEsGDNMMDDVPLAQR</i>                                       | S213, S216                                  | <i>in vitro</i> PPK (a)                     |
| <i>ssNEHYDEAtEDCsR</i>                                               | S230, S231, T239, S242, S244                | <i>in vivo</i> (b), <i>in vitro</i> PPK (a) |
| <i>KLEAAVsK</i>                                                      | S252                                        | <i>in vivo</i> (a), <i>in vitro</i> PPK (a) |
| <i>WDEtDAIVVsGAK</i>                                                 | T257, S263                                  | <i>in vivo</i> (b)                          |
| <i>LTGsEVLDK</i>                                                     | S270                                        | <i>in vitro</i> PPK (a)                     |
| F <sub>ss</sub> EIAEAR                                               | S301, S302                                  | <i>in vitro</i> PPK (a)                     |
| QVEItKK                                                              | T319                                        | <i>in vitro</i> PPK (a)                     |
| DN <sub>s</sub> GVtLEGPK                                             | S467, T470                                  | <i>in vivo</i> (a), <i>in vitro</i> PPK (a) |
| G <sub>s</sub> G <sub>s</sub> AN <sub>s</sub> VG <sub>s</sub> sttRPK | S490, S492, S495, S498,<br>S499, T500, T501 | <i>in vivo</i> (a), <i>in vitro</i> PPK (a) |
| EIPG <sub>s</sub> IR                                                 | S578                                        | <i>in vitro</i> PPK (a)                     |

766 (a) this study, (b) Wirthmueller *et al*, 2018. Phosphopeptides between the WWE and PARP-like domains  
 767 are marked with *italic*. Lowercase s and t represent phosphorylated serine and threonine residues  
 768 respectively. The full list of phosphopeptides identified in this study is present in **Supplementary table**  
 769 **2**.

770

771 **FIGURE LEGENDS**

772 **Figure 1. Nuclear localization of RCD1 is essential for its function.**

773 **A.** Schematic representation of RCD1 domain structure containing a bipartite NLS, WWE, PARP-like  
774 and RST domains. Intrinsically disordered regions between the domains are marked as IDR1-4.

775 **B.** Curly leaf phenotype of *rcd1* can be complemented by re-introduction of wild type RCD1-HA, but  
776 not of RCD1 with mutated NLS (RCD1*nls*-HA) into the mutant background. The photo shows 3-week-  
777 old plant rosettes of two independent lines (A and B) for each construct under standard growth conditions.

778 **C.** RCD1 requires its NLS to complement the *rcd1*-specific MV tolerance. PSII inhibition (Fv/Fm) by  
779 methyl viologen (MV) was measured in indicated lines using 1  $\mu$ M MV. For each experiment, leaf discs  
780 from three individual rosettes were used. The experiment was performed three times with similar results.  
781 Mean  $\pm$  SD are shown. \*\*\* – P-value < 0.001 with Tukey corrected *post hoc* test; n.s. – non-significant  
782 difference. Source data and statistics are presented in **Supplementary table 1**.

783 **D.** Disruption of NLS leads to higher RCD1 accumulation in plants. Abundance of RCD1-HA in  
784 RCD1*nls*-HA and RCD1-HA lines was assessed by immunoblot analysis with HA-specific antibodies.  
785 A total protein amount of 100  $\mu$ g corresponds to 100%. Rubisco large subunit detected by amido black  
786 staining is shown as a control for protein loading.

787

788 **Figure 2. WWE, PARP-like and RST domains are necessary for RCD1 functions.**

789 **A.** Deletion of RCD1 individual domains prevents complementation of *rcd1* early flowering phenotype  
790 in Arabidopsis. Depicted are lines expressing wild type RCD1 or RCD1 versions lacking the WWE  
791 ( $\Delta$ W), PARP-like ( $\Delta$ P) or RST ( $\Delta$ R) domains. The photo shows 5-week-old plants of representative lines  
792 under standard growth conditions.

793 **B.** Immunoblot analysis of two independent domain deletion lines for each construct (A and B) shows  
794 presence of RCD1-HA in complementation lines (upper panel) and increased AOX1/2 expression in  
795 these lines at the level similar to the *rcd1* mutant (middle panel). Rubisco large subunit detected by amido  
796 black staining is shown as a control for equal protein loading.

797 **C.** Wild type MV sensitivity is not restored in lines expressing RCD1 $\Delta$ WWE-HA ( $\Delta$ W), RCD1 $\Delta$ PARP-  
798 like-HA ( $\Delta$ P), and RCD1 $\Delta$ RST-HA ( $\Delta$ R) constructs. PSII inhibition (Fv/Fm) by MV was measured in  
799 indicated lines using 0.5  $\mu$ M MV. For each experiment, leaf discs from three individual rosettes were  
800 used. The experiment was performed three times with similar results. Mean  $\pm$  SD are shown. \* – P-value  
801 < 0.05 with Tukey corrected *post hoc* test at the selected time point between *rcd1*: RCD1 $\Delta$ PARP-like-

802 HA and *rcd1*: RCD1-HA lines; \*\*\* – P-value < 0.001 with Tukey corrected *post hoc* test at the selected  
803 time point between *rcd1*: RCD1 $\Delta$ WWE-HA and *rcd1*: RCD1-HA lines. Source data and full statistics  
804 are presented in **Supplementary table 1**.

805 **D.** Early flowering phenotype of *rcd1* is not fully restored by RCD1-HA deletion constructs. Flowering  
806 time defined as the day of the opening of the first flower after germination, is plotted against the number  
807 of expanded rosette leaves on the flowering day. The experiment was performed three times with similar  
808 results. Mean  $\pm$  SE are shown as intersection and black error bars. \*\* – P-value < 0.01 with Tukey  
809 corrected *post hoc* test. Source data and full statistics are presented in **Supplementary table 1**.

810

811 **Figure 3. RCD1 localizes to NBs dependent on WWE and PARP-like domains and binds PAR.**

812 **A.** Deletion of the WWE or PARP-like domains, but not the RST domain, prevents NB localization of  
813 RCD1. Confocal images were taken from stable Arabidopsis lines expressing full-length RCD1-Venus,  
814 RCD1 $\Delta$ WWE-Venus, RCD1 $\Delta$ PARP-Venus or RCD1 $\Delta$ RST-Venus in the *rcd1* background. Scale bars  
815 indicate 10  $\mu$ m.

816 **B.** Domain deletion does not lead to decreased expression of RCD1. RCD1 level in indicated lines was  
817 assessed by immunoblot analysis of total protein extracts with GFP-specific antibody. A total amount of  
818 100  $\mu$ g protein was loaded per lane.

819 **C.** NB localization of RCD1 is diminished by PARP inhibitor 3MB. Plants expressing RCD1-Venus  
820 were pretreated overnight at 4°C without (control) or with 3MB, after which confocal microscopy was  
821 performed. Scale bars indicate 10  $\mu$ m.

822 **D.** RCD1 binds PAR *in vitro*. PAR binding activity of immobilized GST-tagged domains of RCD1 and  
823 full-length RCD1-His was assessed by dot-blot assay using PAR-specific antibody. GST tagged human  
824 WWE domain (hWWE) and GST were used as positive and negative controls, respectively. GST  
825 antibody was used to assess protein loading.

826 **E.** WWE domain of RCD1 is required for interaction with PAR. SPR sensorgrams of interaction between  
827 immobilized RCD1-His or GST-RCD1 $\Delta$ WWE and PAR profiled at 625 nM. Increase in response units  
828 shows association of PAR with RCD1-His but not with GST-RCD1 $\Delta$ WWE.

829

830 **Figure 4. PPKs and RCD1 co-localize in NB.**



831 **A.** RCD1 co-localizes with PPKs in NBs in tobacco. RCD1-Venus was co-expressed with RFP or RFP-  
832 tagged PPKs in epidermal cells of *N. benthamiana* and the subnuclear localization was analyzed by  
833 confocal microscopy. Scale bars indicate 10  $\mu$ m.

834 **B.** PPK-RFPs alone do not form NBs when transiently expressed in tobacco. PPK-RFP fusion proteins  
835 were expressed as in (A) but without co-expression of RCD1-Venus.

836 **C.** RCD1 co-localizes with PPK1, PPK3 and PPK4 in NBs in Arabidopsis. RFP-tagged PPKs were  
837 transiently expressed in Arabidopsis seedlings expressing RCD1-Venus and the subnuclear localization  
838 was analyzed by confocal microscopy. Scale bars indicate 10  $\mu$ m.

839

#### 840 **Figure 5. PPKs phosphorylate RCD1 at multiple sites.**

841 **A.** RCD1 phosphosites identified by *in vivo* and *in vitro* analyses as described in **Table 1**. RCD1 domains  
842 are highlighted in blue. Individual phosphosites are marked in red and numbered.

843 **B, C.** Phosphosites in the region between WWE and PARP-like domains are targets for PPKs.  
844 Recombinant GST-PPK2 and GST-PPK4 were used together with recombinant GST-RCD1 protein in *in*  
845 *vitro* kinase assays. GST-PPK2 and 4 (asterisks) showed activity towards GST-RCD1 (red arrowhead).  
846 There was much less activity detected against the mutated GST-RCD1<sup>S/T</sup>IDR2<sup>A</sup> protein. Upper panel  
847 shows autoradiograph, lower panel shows the Coomassie-stained SDS-PAGE.

848 **D.** Phosphorylation of RCD1 IDR2 by PPKs affects its stability and function. *In vivo* abundance of  
849 RCD1<sup>S/T</sup>IDR2<sup>A</sup>-HA and of wild-type RCD1-HA variants was assessed in independent transgenic lines  
850 by immunoblot analysis with HA-specific antibody. The RCD1<sup>S/T</sup>IDR2<sup>A</sup>-HA variant did not fully  
851 complement *rcd1*-specific accumulation of alternative oxidases, as revealed by immunoblot with  
852  $\alpha$ AOX1/2 antibodies. Rubisco large subunit detected by amido black staining is shown as a control for  
853 equal protein loading.

854 **E.** RCD1<sup>S/T</sup>IDR2<sup>A</sup>-HA variant does not fully complement *rcd1*-specific tolerance to MV. PSII inhibition  
855 (Fv/Fm) by MV was measured in indicated lines using 0.5  $\mu$ M MV. For each experiment, leaf discs from  
856 at least four individual rosettes were used. The experiment was performed three times with similar results.  
857 Mean  $\pm$  SD are shown. \*\*\* – P-value < 0.001 with Tukey corrected *post hoc* test at the selected time  
858 point between *rcd1*: RCD1<sup>S/T</sup>IDR2<sup>A</sup>-HA (line A) and *rcd1*: RCD1-HA (line A) lines. Full source data  
859 and statistics are presented in **Supplementary table 1**.

860

#### 861 **Figure 6. Knockout of PPKs stabilizes native RCD1.**

862 **A.** RCD1 accumulation in *ppk* triple mutants is higher than in Col-0. RCD1 level was assessed in total  
863 protein extracts from 3-week-old plants by immunoblot analysis with RCD1-specific antibody. The  
864 signal was quantified using ImageJ. The abundance in percent relative to Col-0 (100%) is shown under  
865 the immunoblot panel. Rubisco large subunit detected by amido black staining is shown as a control for  
866 equal protein loading.

867 **B.** *ppk* triple mutants are more sensitive to MV than Col-0. PSII inhibition (Fv/Fm) by MV was measured  
868 in indicated lines using 0.1  $\mu$ M MV. For each experiment, leaf discs from four individual rosettes were  
869 used. The experiment was performed three times with similar results. Mean  $\pm$  SD are shown. \* – P-value  
870  $< 0.05$  with Tukey corrected *post hoc* test at the selected time point between *ppk124* and Col-0. Source  
871 data and statistics are presented in **Supplementary table 1**.

872

873 **Figure 7. A model describing the regulation of nuclear RCD1 function in dependence of PAR**  
874 **binding and phosphorylation by PPKs.** (1) RCD1 enters the nucleus by means of its bipartite N-  
875 terminal NLS sequence. In the nucleus, RCD1 interacts with PPKs (2), with diverse transcription factors  
876 (3) and with PAR (4). PAR recruits RCD1 to NBs of yet uncharacterized nature. Unknown PARylated  
877 proteins involved in RCD1 recruitment are labeled with a question mark. RCD1 is phosphorylated by  
878 PPKs at multiple sites in IDR2 (5), which targets RCD1 for degradation (6). RCD1 structure was  
879 predicted in RaptorX (<http://raptorx.uchicago.edu/>). Structural model of the WWE domain is based on  
880 mouse RNF146 (2RSF), structures of RCD1 PARP-like (5NGO, Wirthmueller *et al*, 2018) and RST  
881 (5N9Q, Bugge *et al*, 2018) domains have been reported. Terminal and inter-domain regions of RCD1 are  
882 not drawn to scale.

883

884 **Supplementary information.**

885 **Supplementary figure 1. RCD1 localization and the domain deletion constructs used in the study.**

886 **A.** RCD1*nls*-Venus is localized outside the nuclei. Confocal images were taken from stable Arabidopsis  
887 lines expressing full-length RCD1-Venus and RCD1*nls*-Venus. DAPI staining was used to highlight  
888 nuclear structures. White bars indicate 10  $\mu$ m.

889 **B.** Schematic representation of RCD1 domain deletion constructs fused to triple HA or triple Venus tag  
890 and expressed in *rcd1* background.

891

892 **Supplementary figure 2. Characterization of stable transgenic lines expressing RCD1 domain**  
893 **deletion constructs fused to triple HA tag in *rcd1* background.**

894 **A.** MV sensitivity is not restored in lines expressing RCD1 $\Delta$ WWE-HA ( $\Delta$ W) and RCD1 $\Delta$ PARP-HA  
895 ( $\Delta$ P), and RCD1 $\Delta$ RST-HA ( $\Delta$ R). Two independent lines for each construct (A and B) were used in the  
896 experiments. PSII inhibition (Fv/Fm) by MV was measured in indicated lines using 0.5  $\mu$ M MV. For  
897 each experiment, leaf discs from three individual rosettes were used. The experiment was performed  
898 three times with similar results. Source data and statistics are presented in **Supplementary table 1.**

899 **B.** Early flowering time phenotype of *rcd1* is not restored in lines expressing RCD1 $\Delta$ WWE-HA ( $\Delta$ W)  
900 and RCD1 $\Delta$ PARP-like-HA ( $\Delta$ P), and RCD1 $\Delta$ RST-HA ( $\Delta$ R). The RCD1<sup>S/T</sup>IDR2<sup>A</sup>-HA variant is  
901 addressed below. Two independent lines for each construct (A and B) were used in the experiments.  
902 Flowering time defined as the day of the opening of the first flower after germination, is plotted against  
903 the number of expanded rosette leaves on the flowering day. The experiment was performed three times  
904 with similar results. Source data and statistics are presented in **Supplementary table 1.**

905

906 **Supplementary figure 3. RCD1 binds PAR but not ADP-ribose or cyclic ADP-ribose.**

907 **A.** The purity of recombinant proteins used in *in vitro* analyses of PAR binding. Proteins were purified,  
908 resolved by SDS-PAGE and stained with Coomassie.

909 **B.** GST-RCD1 $\Delta$ PARP-like binds PAR *in vitro*. PAR binding activity of immobilized GST-  
910 RCD1 $\Delta$ PARP-like and GST-RCD1 was assessed by dot-blot assay using PAR-specific antibody. GST  
911 was used as a negative control and GST antibody was used to assess protein loading.

912 **C.** PAR titration curve obtained by SPR analysis of PAR binding by RCD1-His. The curve was plotted  
913 using non-linear regression with the assumption of one-to-one binding.

914 **D, E.** RCD1-His binds neither mono-ADP-ribose (ADPR), nor cyclic ADP-ribose (cADPR). SPR  
915 sensorgrams do not show any response in case of ADPR or cADPR profiled at 1 mM concentrations over  
916 immobilized RCD1-His.

917

918 **Supplementary figure 4. RCD1 is phosphorylated *in vivo*.** RCD1-HA migrates in SDS-PAGE as a  
919 double band, as visualized by immunoblot analysis of protein extracts with HA-specific antibody. Upper  
920 band corresponding to phosphorylated form of RCD1-HA was diminished by treatment of plant extracts  
921 with alkaline phosphatase (CIP). Rubisco large subunit detected by amido black staining is shown as a  
922 control for equal protein loading.

923

924 **Supplementary figure 5. RCD1-GFP interacts with PPK-HA in tobacco.** RCD1-GFP was transiently  
925 co-expressed with HA-tagged versions of PPK1, 2, 3 or 4 in *N. benthamiana*. YFP served as negative  
926 control. At 72 hours post infiltration, RCD1-GFP and YFP were immunoprecipitated with GFP-specific  
927 antibody and co-precipitating PPK-HA proteins were detected by  $\alpha$ HA immunoblot.  
928 Immunoprecipitation of RCD1-GFP and YFP was confirmed by an  $\alpha$ GFP immunoblot. 'Input' samples  
929 were taken before immunoprecipitation and included on the immunoblots to test for equal expression  
930 and loading.

931

932 **Supplementary figure 6. Recombinant PPK2 and PPK4 are active in *in vitro* kinase assays.**  
933 Recombinant GST-PPK1-4 were used together with generic substrates casein and myelin basic protein  
934 (MBP) in an *in vitro* kinase assay. Upper panel shows autoradiograph, lower panel shows the Coomassie-  
935 stained SDS-PAGE.

936

937 **Supplementary figure 7. Effect of RCD1 phosphorylation in IDR2 by PPKs on the protein function.**

938 **A.** *In vivo* phosphorylation pattern of RCD1<sup>S/T</sup>IDR2<sup>A</sup>-HA is different from that of the wild type RCD1-  
939 HA. Upper band corresponding to phosphorylated form of RCD1 is not detectable in RCD1<sup>S/T</sup>IDR2<sup>A</sup>-  
940 HA line as visualized by immunoblot analysis of protein extracts with HA-specific antibody. The lines  
941 with approximately equal expression of RCD1 were selected for this comparison. 100% corresponds to  
942 100  $\mu$ g of total protein. Rubisco large subunit detected by amido black staining is shown as a control for  
943 equal protein loading.

944 **B.** Early flowering phenotype of *rcd1* is not restored by expression of RCD1<sup>S/T</sup>IDR2<sup>A</sup>-HA in *rcd1*  
945 background. Picture shows 5-week-old plants of representative lines under standard growth conditions.  
946 Domain deletion lines are shown in the same figure for comparison.

947 **C.** PPK phosphorylation in IDR2 does not affect PAR binding by RCD1 *in vitro*. PAR binding activity  
948 of immobilized GST-tagged RCD1<sup>S/T</sup>IDR2<sup>A</sup> and RCD1<sup>S/T</sup>IDR2<sup>D/E</sup>, mimicking non-phosphorylated or  
949 fully phosphorylated RCD1, respectively, was accessed by dot-blot assay using PAR-specific antibody.  
950 GST was used as a negative control. GST antibody was used to assess protein loading.

951

952 **Supplementary figure 8. ASK $\alpha$ , ASK $\gamma$ , and ASK $\epsilon$  phosphorylate RCD1 *in vitro*.**

953 **A.** Specificity of ASK $\alpha$ , ASK $\gamma$  and ASK $\epsilon$  towards RCD1. Recombinant ASK-GSTs were used together  
954 with recombinant GST-RCD1 protein in an *in vitro* kinase assay. P – phosphorylated protein; autoP –  
955 autophosphorylated protein.

956 **B.** Thr204 is the target for ASKs. ASK $\alpha,\gamma,\epsilon$ -GST were used with recombinant GST-RCD1 or GST-  
957 RCD1T204A in an *in vitro* kinase assay. LOF indicates loss-of-function constructs of ASKs.  
958 Upper panels show autoradiographs, lower panels show the Coomassie-stained SDS-PAGE.

959

960 **Supplementary table 1.** Source data and statistical analyses.

961

962 **Supplementary table 2.** Identified RCD1 phosphopeptides.

963

964 **Supplementary table 3.** Primers used in the study.

965

966

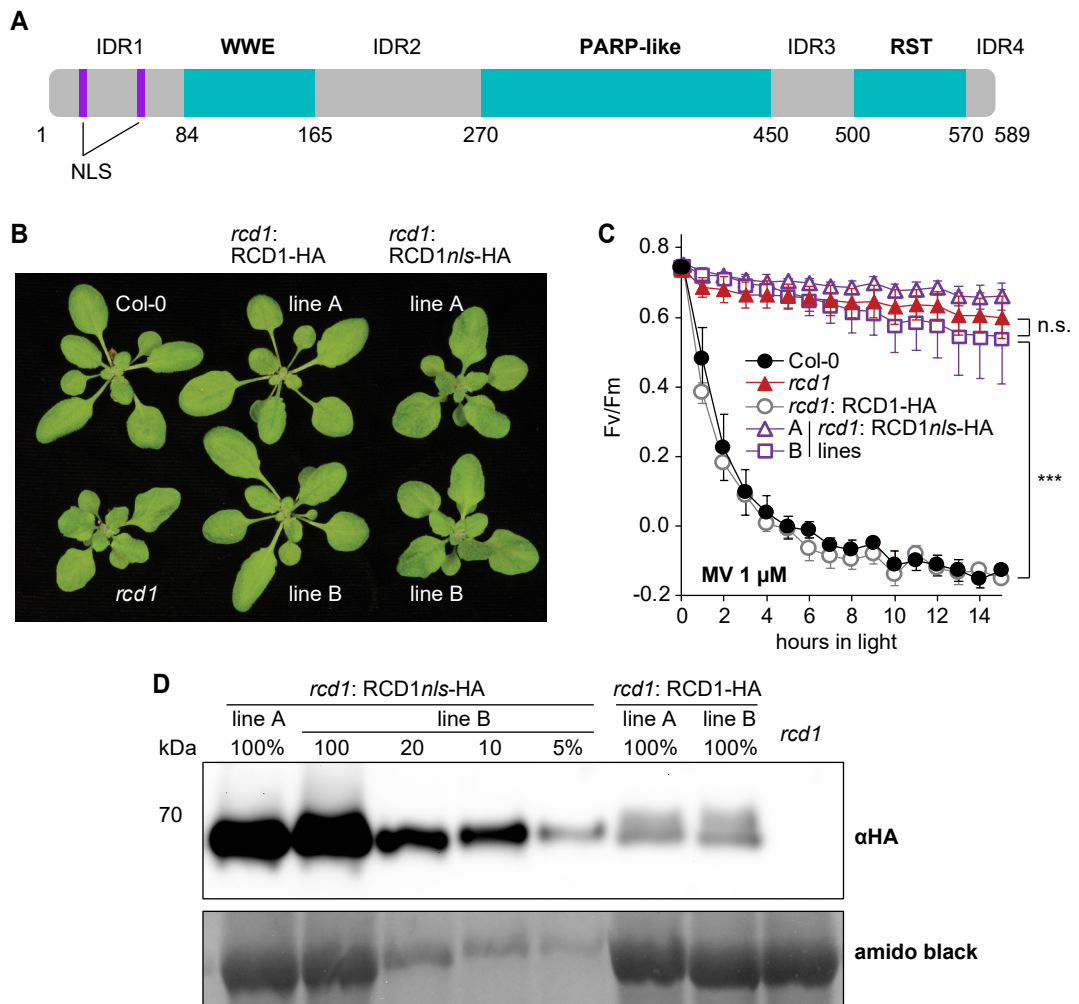

### Figure 1. Nuclear localization of RCD1 is essential for its function.

**A.** Schematic representation of RCD1 domain structure containing a bipartite NLS, WWE, PARP-like and RST domains. Intrinsically disordered regions between the domains are marked as IDR1-4.

**B.** Curly leaf phenotype of *rcd1* can be complemented by re-introduction of wild type RCD1-HA, but not of RCD1 with mutated NLS (RCD1*nls*-HA) into the mutant background. The photo shows 3-week-old plant rosettes of two independent lines (A and B) for each construct under standard growth conditions.

**C.** RCD1 requires its NLS to complement the *rcd1*-specific MV tolerance. PSII inhibition (Fv/Fm) by methyl viologen (MV) was measured in indicated lines using 1  $\mu$ M MV. For each experiment, leaf discs from three individual rosettes were used. The experiment was performed three times with similar results. Mean  $\pm$  SD are shown. \*\*\* – P-value < 0.001 with Tukey corrected *post hoc* test; n.s. – non-significant difference.

Source data and statistics are presented in **Supplementary table 1**.

**D.** Disruption of NLS leads to higher RCD1 accumulation in plants. Abundance of RCD1-HA in RCD1*nls*-HA and RCD1-HA lines was assessed by immunoblot analysis with HA-specific antibodies. A total protein amount of 100  $\mu$ g corresponds to 100%. Rubisco large subunit detected by amido black staining is shown as a control for protein loading.

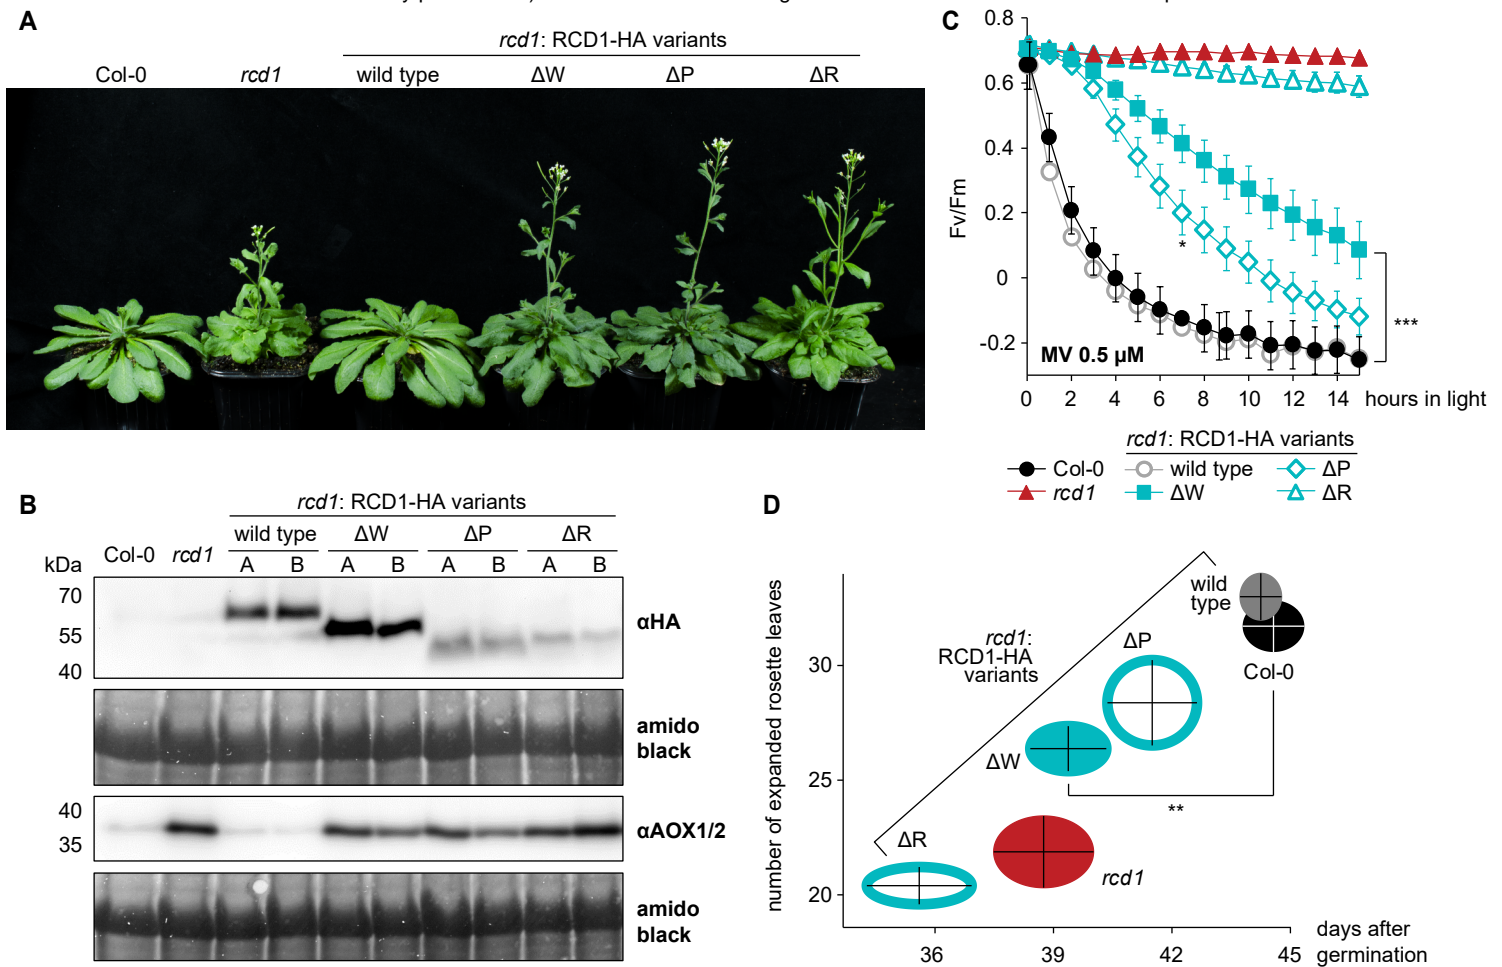

**Figure 2. WWE, PARP-like and RST domains are necessary for RCD1 functions.**

**A.** Deletion of RCD1 individual domains prevents complementation of *rcd1* early flowering phenotype in Arabidopsis. Depicted are lines expressing wild type RCD1 or RCD1 versions lacking the WWE ( $\Delta W$ ), PARP-like ( $\Delta P$ ) or RST ( $\Delta R$ ) domains. The photo shows 5-week-old plants of representative lines under standard growth conditions.

**B.** Immunoblot analysis of two independent domain deletion lines for each construct (A and B) shows presence of RCD1-HA in complementation lines (upper panel) and increased AOX1/2 expression in these lines at the level similar to the *rcd1* mutant (middle panel). Rubisco large subunit detected by amido black staining is shown as a control for equal protein loading.

**C.** Wild type MV sensitivity is not restored in lines expressing RCD1 $\Delta$ WWE-HA ( $\Delta W$ ), RCD1 $\Delta$ PARP-like-HA ( $\Delta P$ ), and RCD1 $\Delta$ RST-HA ( $\Delta R$ ) constructs. PSII inhibition (Fv/Fm) by MV was measured in indicated lines using 0.5  $\mu$ M MV. For each experiment, leaf discs from three individual rosettes were used. The experiment was performed three times with similar results. Mean  $\pm$  SD are shown. \* – P-value < 0.05 with Tukey corrected *post hoc* test at the selected time point between *rcd1*: RCD1 $\Delta$ PARP-like-HA and *rcd1*: RCD1-HA lines; \*\*\* – P-value < 0.001 with Tukey corrected *post hoc* test at the selected time point between *rcd1*: RCD1 $\Delta$ WWE-HA and *rcd1*: RCD1-HA lines. Source data and full statistics are presented in **Supplementary table 1**.

**D.** Early flowering phenotype of *rcd1* is not fully restored by RCD1-HA deletion constructs. Flowering time defined as the day of the opening of the first flower after germination, is plotted against the number of expanded rosette leaves on the flowering day. The experiment was performed three times with similar results. Mean  $\pm$  SE are shown as intersection and black error bars. \*\* – P-value < 0.01 with Tukey corrected *post hoc* test. Source data and full statistics are presented in **Supplementary table 1**.

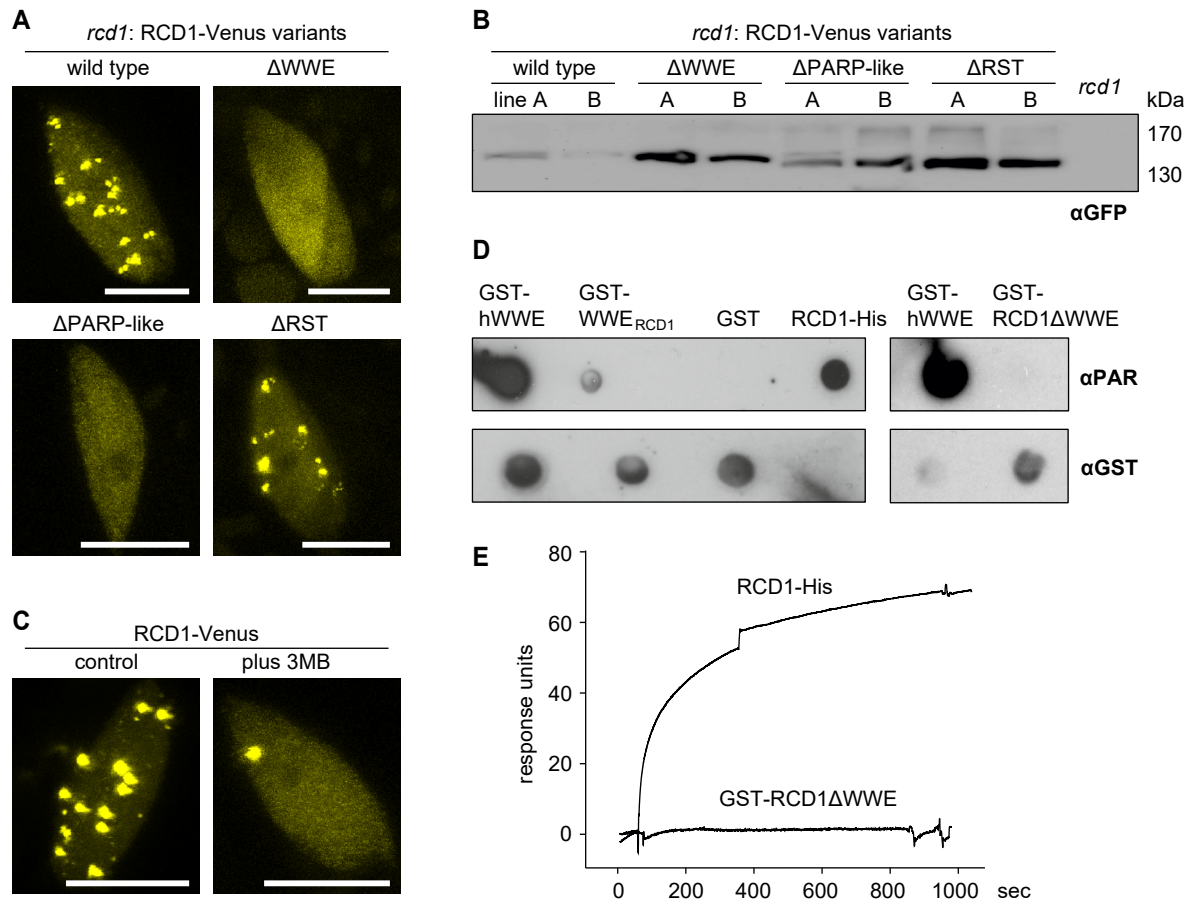

**Figure 3. RCD1 localizes to NBs dependent on WWE and PARP-like domains and binds PAR.**

**A.** Deletion of the WWE or PARP-like domains, but not the RST domain, prevents NB localization of RCD1. Confocal images were taken from stable Arabidopsis lines expressing full-length RCD1-Venus, RCD1 $\Delta$ WWE-Venus, RCD1 $\Delta$ PARP-Venus or RCD1 $\Delta$ RST-Venus in the *rcd1* background. Scale bars indicate 10  $\mu$ m.

**B.** Domain deletion does not lead to decreased expression of RCD1. RCD1 level in indicated lines was assessed by immunoblot analysis of total protein extracts with GFP-specific antibody. A total amount of 100  $\mu$ g protein was loaded per lane.

**C.** NB localization of RCD1 is diminished by PARP inhibitor 3MB. Plants expressing RCD1-Venus were pretreated overnight at 4°C without (control) or with 3MB, after which confocal microscopy was performed. Scale bars indicate 10  $\mu$ m.

**D.** RCD1 binds PAR *in vitro*. PAR binding activity of immobilized GST-tagged domains of RCD1 and full-length RCD1-His was assessed by dot-blot assay using PAR-specific antibody. GST tagged human WWE domain (hWWE) and GST were used as positive and negative controls, respectively. GST antibody was used to assess protein loading.

**E.** WWE domain of RCD1 is required for interaction with PAR. SPR sensorgrams of interaction between immobilized RCD1-His or GST-RCD1 $\Delta$ WWE and PAR profiled at 625 nM. Increase in response units shows association of PAR with RCD1-His but not with GST-RCD1 $\Delta$ WWE.



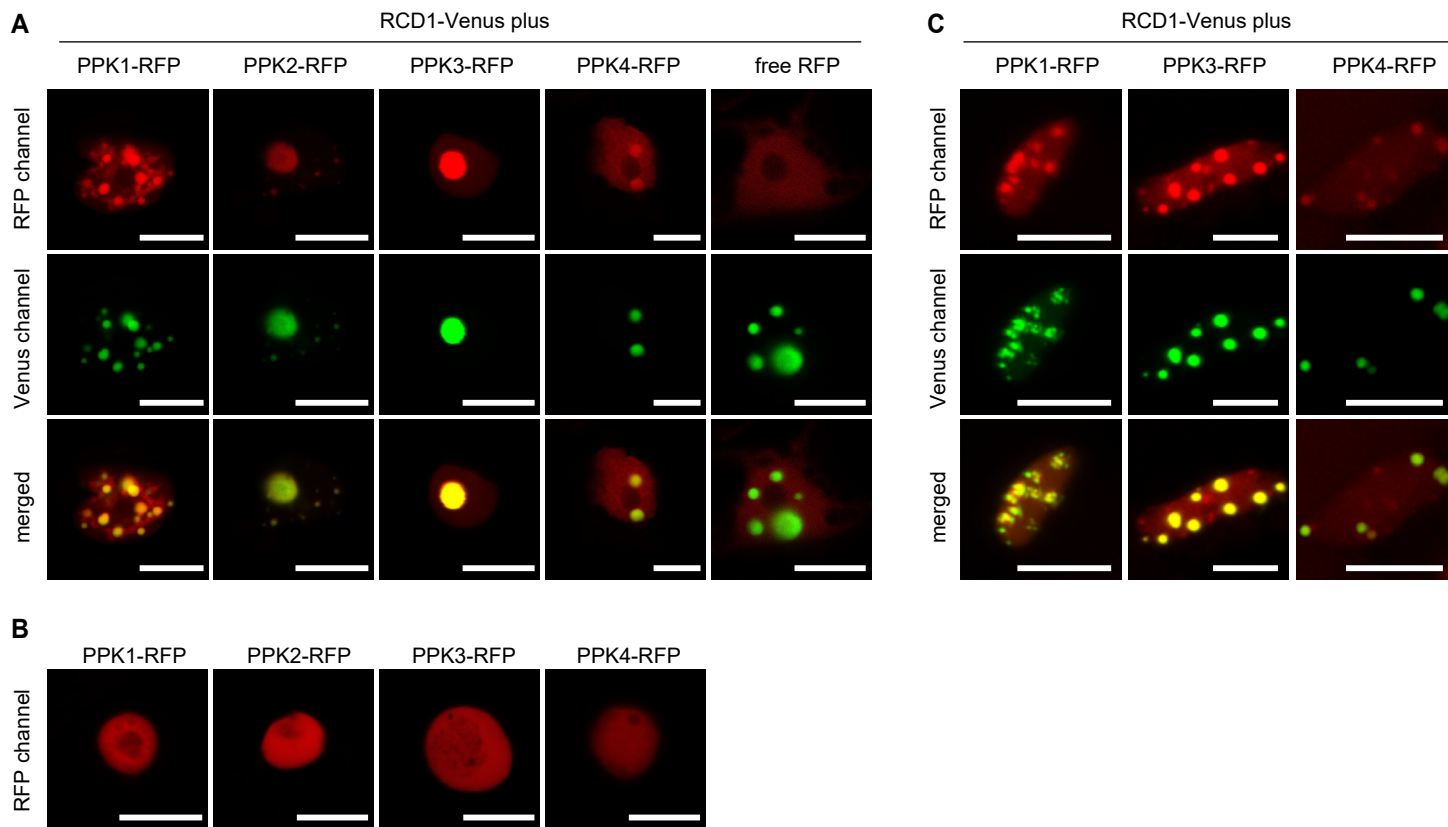

**Figure 4. PPKs and RCD1 co-localize in NB.**

**A.** RCD1 co-localizes with PPKs in NBs in tobacco. RCD1-Venus was co-expressed with RFP or RFP-tagged PPKs in epidermal cells of *N. benthamiana* and the subnuclear localization was analyzed by confocal microscopy.

Scale bars indicate 10  $\mu$ m.

**B.** PPK-RFPs alone do not form NBs when transiently expressed in tobacco. PPK-RFP fusion proteins were expressed as in (A) but without co-expression of RCD1-Venus.

**C.** RCD1 co-localizes with PPK1, PPK3 and PPK4 in NBs in Arabidopsis. RFP-tagged PPKs were transiently expressed in Arabidopsis seedlings expressing RCD1-Venus and the subnuclear localization was analyzed by confocal microscopy. Scale bars indicate 10  $\mu$ m.

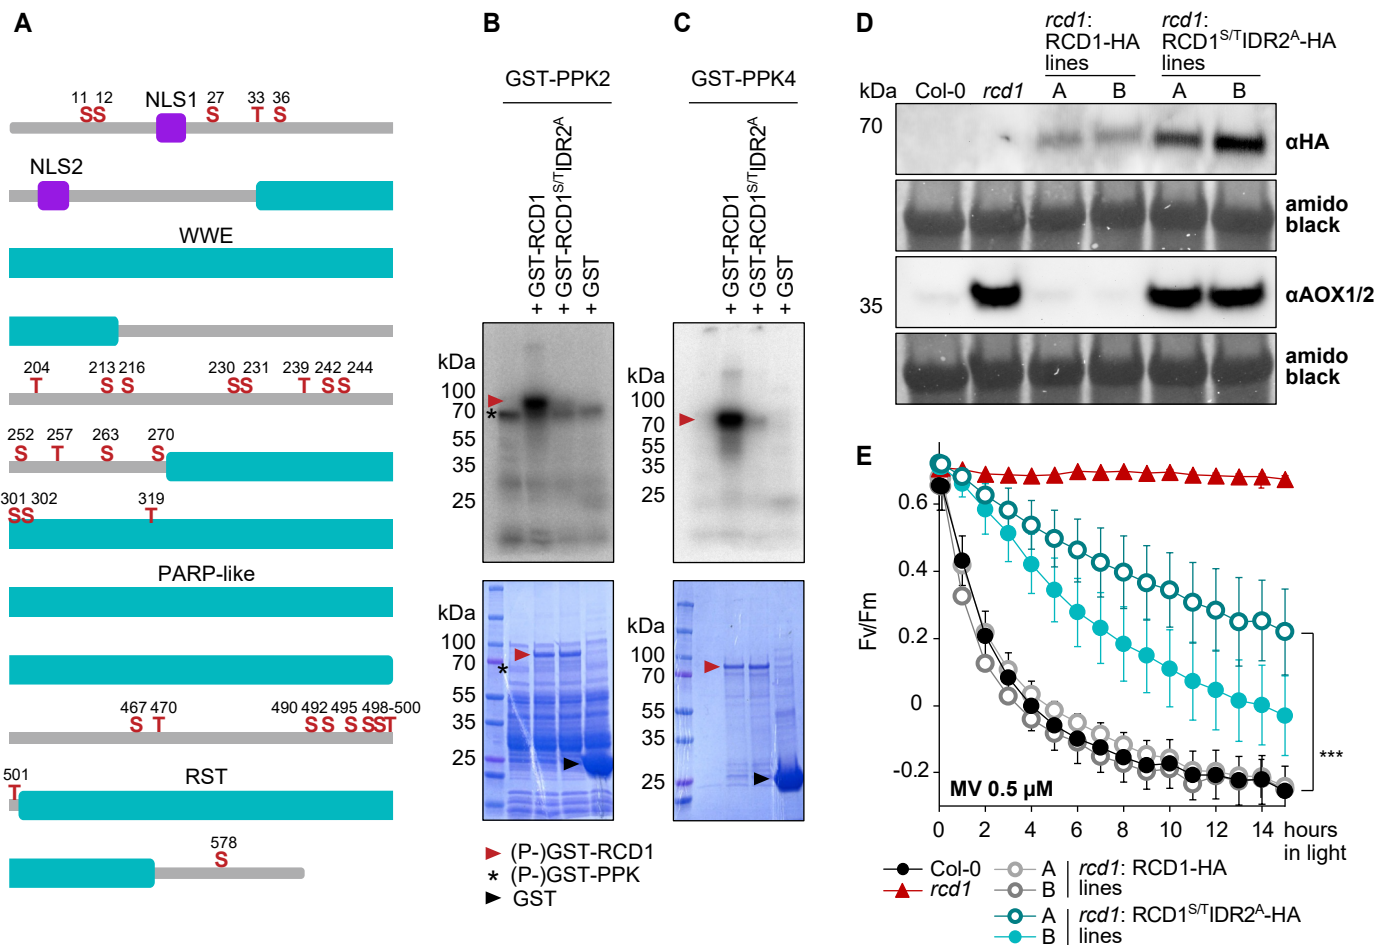

**Figure 5. PPKs phosphorylate RCD1 at multiple sites.**

**A.** RCD1 phosphosites identified by *in vivo* and *in vitro* analyses as described in **Table 1**. RCD1 domains are highlighted in blue. Individual phosphosites are marked in red and numbered.

**B, C.** Phosphosites in the region between WWE and PARP-like domains are targets for PPKs. Recombinant GST-PPK2 and GST-PPK4 were used together with recombinant GST-RCD1 protein in *in vitro* kinase assays. GST-PPK2 and 4 (asterisks) showed activity towards GST-RCD1 (red arrowhead). There was much less activity detected against the mutated GST-RCD1<sup>S/T</sup>IDR2<sup>A</sup> protein. Upper panel shows autoradiograph, lower panel shows the Coomassie-stained SDS-PAGE.

**D.** Phosphorylation of RCD1 IDR2 by PPKs affects its stability and function. *In vivo* abundance of RCD1<sup>S/T</sup>IDR2<sup>A</sup>-HA and of wild-type RCD1-HA variants was assessed in independent transgenic lines by immunoblot analysis with HA-specific antibody. The RCD1<sup>S/T</sup>IDR2<sup>A</sup>-HA variant did not fully complement *rcd1*-specific accumulation of alternative oxidases, as revealed by immunoblot with αAOX1/2 antibodies. Rubisco large subunit detected by amido black staining is shown as a control for equal protein loading.

**E.** RCD1<sup>S/T</sup>IDR2<sup>A</sup>-HA variant does not fully complement *rcd1*-specific tolerance to MV. PSII inhibition (Fv/Fm) by MV was measured in indicated lines using 0.5 μM MV. For each experiment, leaf discs from at least four individual rosettes were used. The experiment was performed three times with similar results. Mean ± SD are shown. \*\*\* – P-value < 0.001 with Tukey corrected *post hoc* test at the selected time point between *rcd1*: RCD1<sup>S/T</sup>IDR2<sup>A</sup>-HA (line A) and *rcd1*: RCD1-HA (line A) lines. Full source data and statistics are presented in **Supplementary table 1**.

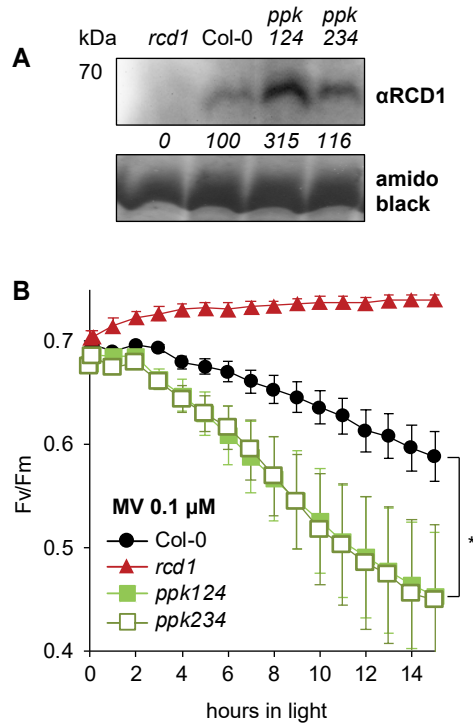

**Figure 6. Knockout of PPKs stabilizes native RCD1.**

**A.** RCD1 accumulation in *ppk* triple mutants is higher than in Col-0. RCD1 level was assessed in total protein extracts from 3-week-old plants by immunoblot analysis with RCD1-specific antibody. The signal was quantified using ImageJ. The abundance in percent relative to Col-0 (100%) is shown under the immunoblot panel. Rubisco large subunit detected by amido black staining is shown as a control for equal protein loading.

**B.** *ppk* triple mutants are more sensitive to MV than Col-0. PSII inhibition (Fv/Fm) by MV was measured in indicated lines using 0.1  $\mu$ M MV. For each experiment, leaf discs from four individual rosettes were used. The experiment was performed three times with similar results. Mean  $\pm$  SD are shown. \* – P-value < 0.05 with Tukey corrected *post hoc* test at the selected time point between *ppk124* and Col-0. Source data and statistics are presented in **Supplementary table 1**.

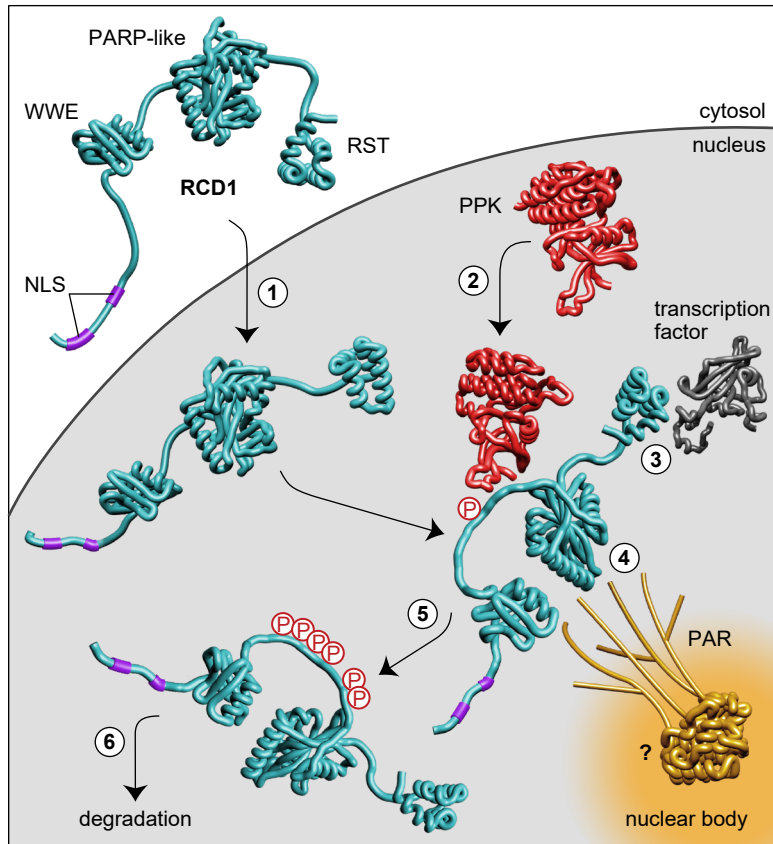

**Figure 7. A model describing the regulation of nuclear RCD1 function in dependence of PAR binding and phosphorylation by PPKs.** (1) RCD1 enters the nucleus by means of its bipartite N-terminal NLS sequence. In the nucleus, RCD1 interacts with PPKs (2), with diverse transcription factors (3) and with PAR (4). PAR recruits RCD1 to NBs of yet uncharacterized nature. Unknown PARylated proteins involved in RCD1 recruitment are labeled with a question mark. RCD1 is phosphorylated by PPKs at multiple sites in IDR2 (5), which targets RCD1 for degradation (6). RCD1 structure was predicted in RaptorX (<http://raptorx.uchicago.edu/>). Structural model of the WWE domain is based on mouse RNF146 (2RSF), structures of RCD1 PARP-like (5NGO, Wirthmueller et al, 2018) and RST (5N9Q, Bugge et al, 2018) domains have been reported. Terminal and inter-domain regions of RCD1 are not drawn to scale.
